# Supplementary material for: Protonation state control of electric field induced molecular switching mechanisms
Source: Royal Society of Chemistry journal article supplement (doi:10.1039/d2cp04494c), 2023-01-01
Supplement: d2cp04494c1.pdf [file d2cp04494c1.pdf]

# Supporting Information:

## Protonation State Control of Electric Field Induced Molecular Switching Mechanism

Emily M. Kempfer-Robertson, Irma Avdic, Meagan N. Haase, Thomas D. Pike,  
and Lee M. Thompson\*

*Department of Chemistry, University of Louisville, Louisville, Kentucky 40205, USA*

E-mail: lee.thompson.1@louisville.edu

### Contents

|          |                                                                                                               |             |
|----------|---------------------------------------------------------------------------------------------------------------|-------------|
| <b>1</b> | <b>Thermal Isomerization Pathways of 4,4'-dihydroxyazobenzene</b>                                             | <b>S-9</b>  |
| 1.1      | Electric Field Modification of the Ground State Potential Energy Surface of<br>HO-AB-OH . . . . .             | S-9         |
| 1.2      | Electric Field Modification of the Ground State Potential Energy Surface of<br>HO-AB-O <sup>-</sup> . . . . . | S-10        |
| <b>2</b> | <b>Photoisomerization Pathways of 4,4'-dihydroxyazobenzene</b>                                                | <b>S-12</b> |
| 2.1      | Electric Field Modification of Excited State Potential Energy Surfaces of<br>HO-AB-OH . . . . .               | S-12        |
| 2.2      | Electric Field Modification of Excited State Potential Energy Surfaces of<br>HO-AB-O <sup>-</sup> . . . . .   | S-13        |
| 2.3      | $S_0/S_1$ Branching Space Normal Modes . . . . .                                                              | S-14        |
| 2.4      | Potential Energy Surfaces of Deprotonated Molecule Under Applied Field . .                                    | S-17        |

### 3 Cartesian coordinates and energies of protonated OH–AB–OH structures

**in field free conditions** **S-18**

|     |                                                                           |      |
|-----|---------------------------------------------------------------------------|------|
| 3.1 | Field Free OH–AB–OH Trans Structure $S_0$ State . . . . .                 | S-18 |
| 3.2 | Field Free OH–AB–OH Rotation TS Structure $S_0$ State . . . . .           | S-19 |
| 3.3 | Field Free OH–AB–OH Rotation Inversion TS Structure $S_0$ State . . . . . | S-20 |
| 3.4 | Field Free OH–AB–OH Inversion TS Structure $S_0$ State . . . . .          | S-21 |
| 3.5 | Field Free OH–AB–OH Cis Structure $S_0$ State . . . . .                   | S-22 |

### 4 Cartesian coordinates and energies of protonated OH–AB–OH structures

**in  $F_{NN}$  conditions** **S-23**

|      |                                                                                    |      |
|------|------------------------------------------------------------------------------------|------|
| 4.1  | $F_{NN}$ -0.0025 au OH–AB–OH Trans Structure $S_0$ State . . . . .                 | S-23 |
| 4.2  | $F_{NN}$ -0.0025 au OH–AB–OH Rotation TS Structure $S_0$ State . . . . .           | S-24 |
| 4.3  | $F_{NN}$ -0.0025 au OH–AB–OH Rotation Inversion TS Structure $S_0$ State . . . . . | S-25 |
| 4.4  | $F_{NN}$ -0.0025 au OH–AB–OH Inversion TS Structure $S_0$ State . . . . .          | S-26 |
| 4.5  | $F_{NN}$ -0.0025 au OH–AB–OH Cis Structure $S_0$ State . . . . .                   | S-27 |
| 4.6  | $F_{NN}$ -0.0050 au OH–AB–OH Trans Structure $S_0$ State . . . . .                 | S-28 |
| 4.7  | $F_{NN}$ -0.0050 au OH–AB–OH Rotation TS Structure $S_0$ State . . . . .           | S-29 |
| 4.8  | $F_{NN}$ -0.0050 au OH–AB–OH Rotation Inversion TS Structure $S_0$ State . . . . . | S-30 |
| 4.9  | $F_{NN}$ -0.0050 au OH–AB–OH Inversion TS Structure $S_0$ State . . . . .          | S-31 |
| 4.10 | $F_{NN}$ -0.0050 au OH–AB–OH Cis Structure $S_0$ State . . . . .                   | S-32 |
| 4.11 | $F_{NN}$ -0.0075 au OH–AB–OH Trans Structure $S_0$ State . . . . .                 | S-33 |
| 4.12 | $F_{NN}$ -0.0075 au OH–AB–OH Rotation TS Structure $S_0$ State . . . . .           | S-34 |
| 4.13 | $F_{NN}$ -0.0075 au OH–AB–OH Rotation Inversion TS Structure $S_0$ State . . . . . | S-35 |
| 4.14 | $F_{NN}$ -0.0075 au OH–AB–OH Inversion TS Structure $S_0$ State . . . . .          | S-36 |
| 4.15 | $F_{NN}$ -0.0075 au OH–AB–OH Cis Structure $S_0$ State . . . . .                   | S-37 |
| 4.16 | $F_{NN}$ -0.0100 au OH–AB–OH Trans Structure $S_0$ State . . . . .                 | S-38 |
| 4.17 | $F_{NN}$ -0.0100 au OH–AB–OH Rotation TS Structure $S_0$ State . . . . .           | S-39 |
| 4.18 | $F_{NN}$ -0.0100 au OH–AB–OH Rotation Inversion TS Structure $S_0$ State . . . . . | S-40 |

|      |                                                                              |      |
|------|------------------------------------------------------------------------------|------|
| 4.19 | $F_{NN}$ -0.0100 au OH-AB-OH Inversion TS Structure $S_0$ State . . . . .    | S-41 |
| 4.20 | $F_{NN}$ -0.0100 au OH-AB-OH Cis Structure $S_0$ State . . . . .             | S-42 |
| 4.21 | $F_{NN}$ +0.0025 au OH-AB-OH Trans Structure $S_0$ State . . . . .           | S-43 |
| 4.22 | $F_{NN}$ +0.0025 au OH-AB-OH Rotation TS Structure $S_0$ State . . . . .     | S-44 |
| 4.23 | $F_{NN}$ +0.0025 au OH-AB-OH Rotation Inversion TS Structure $S_0$ State . . | S-45 |
| 4.24 | $F_{NN}$ +0.0025 au OH-AB-OH Inversion TS Structure $S_0$ State . . . . .    | S-46 |
| 4.25 | $F_{NN}$ +0.0025 au OH-AB-OH Cis Structure $S_0$ State . . . . .             | S-47 |
| 4.26 | $F_{NN}$ +0.0050 au OH-AB-OH Trans Structure $S_0$ State . . . . .           | S-48 |
| 4.27 | $F_{NN}$ +0.0050 au OH-AB-OH Rotation TS Structure $S_0$ State . . . . .     | S-49 |
| 4.28 | $F_{NN}$ +0.0050 au OH-AB-OH Rotation Inversion TS Structure $S_0$ State . . | S-50 |
| 4.29 | $F_{NN}$ +0.0050 au OH-AB-OH Inversion TS Structure $S_0$ State . . . . .    | S-51 |
| 4.30 | $F_{NN}$ +0.0050 au OH-AB-OH Cis Structure $S_0$ State . . . . .             | S-52 |
| 4.31 | $F_{NN}$ +0.0075 au OH-AB-OH Trans Structure $S_0$ State . . . . .           | S-53 |
| 4.32 | $F_{NN}$ +0.0075 au OH-AB-OH Rotation TS Structure $S_0$ State . . . . .     | S-54 |
| 4.33 | $F_{NN}$ +0.0075 au OH-AB-OH Rotation Inversion TS Structure $S_0$ State . . | S-55 |
| 4.34 | $F_{NN}$ +0.0075 au OH-AB-OH Inversion TS Structure $S_0$ State . . . . .    | S-56 |
| 4.35 | $F_{NN}$ +0.0075 au OH-AB-OH Cis Structure $S_0$ State . . . . .             | S-57 |
| 4.36 | $F_{NN}$ +0.0100 au OH-AB-OH Trans Structure $S_0$ State . . . . .           | S-58 |
| 4.37 | $F_{NN}$ +0.0100 au OH-AB-OH Rotation TS Structure $S_0$ State . . . . .     | S-59 |
| 4.38 | $F_{NN}$ +0.0100 au OH-AB-OH Rotation Inversion TS Structure $S_0$ State . . | S-60 |
| 4.39 | $F_{NN}$ +0.0100 au OH-AB-OH Inversion TS Structure $S_0$ State . . . . .    | S-61 |
| 4.40 | $F_{NN}$ +0.0100 au OH-AB-OH Cis Structure $S_0$ State . . . . .             | S-62 |

## 5 Cartesian coordinates and energies of protonated OH-AB-OH structures

|     |                                                                                |             |
|-----|--------------------------------------------------------------------------------|-------------|
|     | <b>in <math>F_{OC}</math> conditions</b>                                       | <b>S-63</b> |
| 5.1 | $F_{OC}$ -0.0025 au OH-AB-OH Trans Structure $S_0$ State . . . . .             | S-63        |
| 5.2 | $F_{OC}$ -0.0025 au OH-AB-OH Rotation TS Structure $S_0$ State . . . . .       | S-64        |
| 5.3 | $F_{OC}$ -0.0025 au OH-AB-OH Rotation Inversion TS Structure $S_0$ State . . . | S-65        |

|      |                                                                                |      |
|------|--------------------------------------------------------------------------------|------|
| 5.4  | $F_{OC}$ -0.0025 au OH-AB-OH Inversion TS Structure $S_0$ State . . . . .      | S-66 |
| 5.5  | $F_{OC}$ -0.0025 au OH-AB-OH Cis Structure $S_0$ State . . . . .               | S-67 |
| 5.6  | $F_{OC}$ -0.0050 au OH-AB-OH Trans Structure $S_0$ State . . . . .             | S-68 |
| 5.7  | $F_{OC}$ -0.0050 au OH-AB-OH Rotation TS Structure $S_0$ State . . . . .       | S-69 |
| 5.8  | $F_{OC}$ -0.0050 au OH-AB-OH Rotation Inversion TS Structure $S_0$ State . . . | S-70 |
| 5.9  | $F_{OC}$ -0.0050 au OH-AB-OH Inversion TS Structure $S_0$ State . . . . .      | S-71 |
| 5.10 | $F_{OC}$ -0.0050 au OH-AB-OH Cis Structure $S_0$ State . . . . .               | S-72 |
| 5.11 | $F_{OC}$ -0.0075 au OH-AB-OH Trans Structure $S_0$ State . . . . .             | S-73 |
| 5.12 | $F_{OC}$ -0.0075 au OH-AB-OH Rotation TS Structure $S_0$ State . . . . .       | S-74 |
| 5.13 | $F_{OC}$ -0.0075 au OH-AB-OH Rotation Inversion TS Structure $S_0$ State . . . | S-75 |
| 5.14 | $F_{OC}$ -0.0075 au OH-AB-OH Inversion TS Structure $S_0$ State . . . . .      | S-76 |
| 5.15 | $F_{OC}$ -0.0075 au OH-AB-OH Cis Structure $S_0$ State . . . . .               | S-77 |
| 5.16 | $F_{OC}$ -0.0100 au OH-AB-OH Trans Structure $S_0$ State . . . . .             | S-78 |
| 5.17 | $F_{OC}$ -0.0100 au OH-AB-OH Rotation TS Structure $S_0$ State . . . . .       | S-79 |
| 5.18 | $F_{OC}$ -0.0100 au OH-AB-OH Rotation Inversion TS Structure $S_0$ State . . . | S-80 |
| 5.19 | $F_{OC}$ -0.0100 au OH-AB-OH Inversion TS Structure $S_0$ State . . . . .      | S-81 |
| 5.20 | $F_{OC}$ -0.0100 au OH-AB-OH Cis Structure $S_0$ State . . . . .               | S-82 |
| 5.21 | $F_{OC}$ +0.0025 au OH-AB-OH Trans Structure $S_0$ State . . . . .             | S-83 |
| 5.22 | $F_{OC}$ +0.0025 au OH-AB-OH Rotation TS Structure $S_0$ State . . . . .       | S-84 |
| 5.23 | $F_{OC}$ +0.0025 au OH-AB-OH Rotation Inversion TS Structure $S_0$ State . .   | S-85 |
| 5.24 | $F_{OC}$ +0.0025 au OH-AB-OH Inversion TS Structure $S_0$ State . . . . .      | S-86 |
| 5.25 | $F_{OC}$ +0.0025 au OH-AB-OH Cis Structure $S_0$ State . . . . .               | S-87 |
| 5.26 | $F_{OC}$ +0.0050 au OH-AB-OH Trans Structure $S_0$ State . . . . .             | S-88 |
| 5.27 | $F_{OC}$ +0.0050 au OH-AB-OH Rotation TS Structure $S_0$ State . . . . .       | S-89 |
| 5.28 | $F_{OC}$ +0.0050 au OH-AB-OH Rotation Inversion TS Structure $S_0$ State . .   | S-90 |
| 5.29 | $F_{OC}$ +0.0050 au OH-AB-OH Inversion TS Structure $S_0$ State . . . . .      | S-91 |
| 5.30 | $F_{OC}$ +0.0050 au OH-AB-OH Cis Structure $S_0$ State . . . . .               | S-92 |

|          |                                                                                                                            |              |
|----------|----------------------------------------------------------------------------------------------------------------------------|--------------|
| 5.31     | $F_{OC} + 0.0075$ au OH-AB-OH Trans Structure $S_0$ State . . . . .                                                        | S-93         |
| 5.32     | $F_{OC} + 0.0075$ au OH-AB-OH Rotation TS Structure $S_0$ State . . . . .                                                  | S-94         |
| 5.33     | $F_{OC} + 0.0075$ au OH-AB-OH Rotation Inversion TS Structure $S_0$ State . .                                              | S-95         |
| 5.34     | $F_{OC} + 0.0075$ au OH-AB-OH Inversion TS Structure $S_0$ State . . . . .                                                 | S-96         |
| 5.35     | $F_{OC} + 0.0075$ au OH-AB-OH Cis Structure $S_0$ State . . . . .                                                          | S-97         |
| 5.36     | $F_{OC} + 0.0100$ au OH-AB-OH Trans Structure $S_0$ State . . . . .                                                        | S-98         |
| 5.37     | $F_{OC} + 0.0100$ au OH-AB-OH Rotation TS Structure $S_0$ State . . . . .                                                  | S-99         |
| 5.38     | $F_{OC} + 0.0100$ au OH-AB-OH Rotation Inversion TS Structure $S_0$ State . .                                              | S-100        |
| 5.39     | $F_{OC} + 0.0100$ au OH-AB-OH Inversion TS Structure $S_0$ State . . . . .                                                 | S-101        |
| 5.40     | $F_{OC} + 0.0100$ au OH-AB-OH Cis Structure $S_0$ State . . . . .                                                          | S-102        |
| <b>6</b> | <b>Cartesian coordinates and energies of deprotonated OH-AB-O<sup>-</sup> structures in field free conditions</b>          | <b>S-103</b> |
| 6.1      | Field Free OH-AB-O <sup>-</sup> Trans Structure $S_0$ State . . . . .                                                      | S-103        |
| 6.2      | Field Free OH-AB-O <sup>-</sup> Rotation TS Structure $S_0$ State . . . . .                                                | S-104        |
| 6.3      | Field Free OH-AB-O <sup>-</sup> Rotation Inversion TS Structure $S_0$ State . . . . .                                      | S-105        |
| 6.4      | Field Free OH-AB-O <sup>-</sup> Inversion TS Structure $S_0$ State . . . . .                                               | S-106        |
| 6.5      | Field Free OH-AB-O <sup>-</sup> Cis Structure $S_0$ State . . . . .                                                        | S-107        |
| <b>7</b> | <b>Cartesian coordinates and energies of deprotonated OH-AB-O<sup>-</sup> structures in <math>F_{NN}</math> conditions</b> | <b>S-108</b> |
| 7.1      | $F_{NN} - 0.0025$ au OH-AB-O <sup>-</sup> Trans Structure $S_0$ State . . . . .                                            | S-108        |
| 7.2      | $F_{NN} - 0.0025$ au OH-AB-O <sup>-</sup> Rotation TS Structure $S_0$ State . . . . .                                      | S-109        |
| 7.3      | $F_{NN} - 0.0025$ au OH-AB-O <sup>-</sup> Rotation Inversion TS Structure $S_0$ State . . .                                | S-110        |
| 7.4      | $F_{NN} - 0.0025$ au OH-AB-O <sup>-</sup> Inversion TS Structure $S_0$ State . . . . .                                     | S-111        |
| 7.5      | $F_{NN} - 0.0025$ au OH-AB-O <sup>-</sup> Cis Structure $S_0$ State . . . . .                                              | S-112        |
| 7.6      | $F_{NN} - 0.0050$ au OH-AB-O <sup>-</sup> Trans Structure $S_0$ State . . . . .                                            | S-113        |
| 7.7      | $F_{NN} - 0.0050$ au OH-AB-O <sup>-</sup> Rotation TS Structure $S_0$ State . . . . .                                      | S-114        |

|      |                                                                                            |       |
|------|--------------------------------------------------------------------------------------------|-------|
| 7.8  | $F_{NN}$ -0.0050 au OH-AB-O <sup>-</sup> Rotation Inversion TS Structure $S_0$ State . . . | S-115 |
| 7.9  | $F_{NN}$ -0.0050 au OH-AB-O <sup>-</sup> Inversion TS Structure $S_0$ State . . . . .      | S-116 |
| 7.10 | $F_{NN}$ -0.0050 au OH-AB-O <sup>-</sup> Cis Structure $S_0$ State . . . . .               | S-117 |
| 7.11 | $F_{NN}$ -0.0075 au OH-AB-O <sup>-</sup> Trans Structure $S_0$ State . . . . .             | S-118 |
| 7.12 | $F_{NN}$ -0.0075 au OH-AB-O <sup>-</sup> Rotation TS Structure $S_0$ State . . . . .       | S-119 |
| 7.13 | $F_{NN}$ -0.0075 au OH-AB-OH Rotation Inversion TS Structure $S_0$ State . .               | S-120 |
| 7.14 | $F_{NN}$ -0.0075 au OH-AB-O <sup>-</sup> Inversion TS Structure $S_0$ State . . . . .      | S-121 |
| 7.15 | $F_{NN}$ -0.0075 au OH-AB-O <sup>-</sup> Cis Structure $S_0$ State . . . . .               | S-122 |
| 7.16 | $F_{NN}$ -0.0100 au OH-AB-O <sup>-</sup> Trans Structure $S_0$ State . . . . .             | S-123 |
| 7.17 | $F_{NN}$ -0.0100 au OH-AB-O <sup>-</sup> Rotation TS Structure $S_0$ State . . . . .       | S-124 |
| 7.18 | $F_{NN}$ -0.0100 au OH-AB-O <sup>-</sup> Rotation Inversion TS Structure $S_0$ State . . . | S-125 |
| 7.19 | $F_{NN}$ -0.0100 au OH-AB-O <sup>-</sup> Inversion TS Structure $S_0$ State . . . . .      | S-126 |
| 7.20 | $F_{NN}$ -0.0100 au OH-AB-O <sup>-</sup> Cis Structure $S_0$ State . . . . .               | S-127 |
| 7.21 | $F_{NN}$ +0.0025 au OH-AB-O <sup>-</sup> Trans Structure $S_0$ State . . . . .             | S-128 |
| 7.22 | $F_{NN}$ +0.0025 au OH-AB-O <sup>-</sup> Rotation TS Structure $S_0$ State . . . . .       | S-129 |
| 7.23 | $F_{NN}$ +0.0025 au OH-AB-O <sup>-</sup> Rotation Inversion TS Structure $S_0$ State . .   | S-130 |
| 7.24 | $F_{NN}$ +0.0025 au OH-AB-O <sup>-</sup> Inversion TS Structure $S_0$ State . . . . .      | S-131 |
| 7.25 | $F_{NN}$ +0.0025 au OH-AB-O <sup>-</sup> Cis Structure $S_0$ State . . . . .               | S-132 |
| 7.26 | $F_{NN}$ +0.0050 au OH-AB-O <sup>-</sup> Trans Structure $S_0$ State . . . . .             | S-133 |
| 7.27 | $F_{NN}$ +0.0050 au OH-AB-O <sup>-</sup> Rotation TS Structure $S_0$ State . . . . .       | S-134 |
| 7.28 | $F_{NN}$ +0.0050 au OH-AB-O <sup>-</sup> Rotation Inversion TS Structure $S_0$ State . .   | S-135 |
| 7.29 | $F_{NN}$ +0.0050 au OH-AB-O <sup>-</sup> Inversion TS Structure $S_0$ State . . . . .      | S-136 |
| 7.30 | $F_{NN}$ +0.0050 au OH-AB-O <sup>-</sup> Cis Structure $S_0$ State . . . . .               | S-137 |
| 7.31 | $F_{NN}$ +0.0075 au OH-AB-O <sup>-</sup> Trans Structure $S_0$ State . . . . .             | S-138 |
| 7.32 | $F_{NN}$ +0.0075 au OH-AB-O <sup>-</sup> Rotation TS Structure $S_0$ State . . . . .       | S-139 |
| 7.33 | $F_{NN}$ +0.0075 au OH-AB-O <sup>-</sup> Rotation Inversion TS Structure $S_0$ State . .   | S-140 |
| 7.34 | $F_{NN}$ +0.0075 au OH-AB-O <sup>-</sup> Inversion TS Structure $S_0$ State . . . . .      | S-141 |

|      |                                                                                           |       |
|------|-------------------------------------------------------------------------------------------|-------|
| 7.35 | $F_{NN} + 0.0075$ au OH-AB-O <sup>-</sup> Cis Structure $S_0$ State . . . . .             | S-142 |
| 7.36 | $F_{NN} + 0.0100$ au OH-AB-O <sup>-</sup> Trans Structure $S_0$ State . . . . .           | S-143 |
| 7.37 | $F_{NN} + 0.0100$ au OH-AB-O <sup>-</sup> Rotation TS Structure $S_0$ State . . . . .     | S-144 |
| 7.38 | $F_{NN} + 0.0100$ au OH-AB-O <sup>-</sup> Rotation Inversion TS Structure $S_0$ State . . | S-145 |
| 7.39 | $F_{NN} + 0.0100$ au OH-AB-O <sup>-</sup> Inversion TS Structure $S_0$ State . . . . .    | S-146 |
| 7.40 | $F_{NN} + 0.0100$ au OH-AB-O <sup>-</sup> Cis Structure $S_0$ State . . . . .             | S-147 |

**8 Cartesian coordinates and energies of deprotonated OH-AB-O<sup>-</sup> structures in  $F_{OC}$  conditions** **S-148**

|      |                                                                                             |       |
|------|---------------------------------------------------------------------------------------------|-------|
| 8.1  | $F_{OC} - 0.0025$ au OH-AB-O <sup>-</sup> Trans Structure $S_0$ State . . . . .             | S-148 |
| 8.2  | $F_{OC} - 0.0025$ au OH-AB-O <sup>-</sup> Rotation TS Structure $S_0$ State . . . . .       | S-149 |
| 8.3  | $F_{OC} - 0.0025$ au OH-AB-O <sup>-</sup> Rotation Inversion TS Structure $S_0$ State . . . | S-150 |
| 8.4  | $F_{OC} - 0.0025$ au OH-AB-O <sup>-</sup> Inversion TS Structure $S_0$ State . . . . .      | S-151 |
| 8.5  | $F_{OC} - 0.0025$ au OH-AB-O <sup>-</sup> Cis Structure $S_0$ State . . . . .               | S-152 |
| 8.6  | $F_{OC} - 0.0050$ au OH-AB-O <sup>-</sup> Trans Structure $S_0$ State . . . . .             | S-153 |
| 8.7  | $F_{OC} - 0.0050$ au OH-AB-O <sup>-</sup> Rotation TS Structure $S_0$ State . . . . .       | S-154 |
| 8.8  | $F_{OC} - 0.0050$ au OH-AB-O <sup>-</sup> Rotation Inversion TS Structure $S_0$ State . . . | S-155 |
| 8.9  | $F_{OC} - 0.0050$ au OH-AB-O <sup>-</sup> Inversion TS Structure $S_0$ State . . . . .      | S-156 |
| 8.10 | $F_{OC} - 0.0050$ au OH-AB-O <sup>-</sup> Cis Structure $S_0$ State . . . . .               | S-157 |
| 8.11 | $F_{OC} - 0.0075$ au OH-AB-O <sup>-</sup> Trans Structure $S_0$ State . . . . .             | S-158 |
| 8.12 | $F_{OC} - 0.0075$ au OH-AB-O <sup>-</sup> Rotation TS Structure $S_0$ State . . . . .       | S-159 |
| 8.13 | $F_{OC} - 0.0075$ au OH-AB-OH Rotation Inversion TS Structure $S_0$ State . . .             | S-160 |
| 8.14 | $F_{OC} - 0.0075$ au OH-AB-O <sup>-</sup> Inversion TS Structure $S_0$ State . . . . .      | S-161 |
| 8.15 | $F_{OC} - 0.0075$ au OH-AB-O <sup>-</sup> Cis Structure $S_0$ State . . . . .               | S-162 |
| 8.16 | $F_{OC} - 0.0100$ au OH-AB-O <sup>-</sup> Trans Structure $S_0$ State . . . . .             | S-163 |
| 8.17 | $F_{OC} - 0.0100$ au OH-AB-O <sup>-</sup> Rotation TS Structure $S_0$ State . . . . .       | S-164 |
| 8.18 | $F_{OC} - 0.0100$ au OH-AB-O <sup>-</sup> Rotation Inversion TS Structure $S_0$ State . . . | S-165 |
| 8.19 | $F_{OC} - 0.0100$ au OH-AB-O <sup>-</sup> Inversion TS Structure $S_0$ State . . . . .      | S-166 |

|      |                                                                                          |       |
|------|------------------------------------------------------------------------------------------|-------|
| 8.20 | $F_{OC}$ -0.0100 au OH-AB-O <sup>-</sup> Cis Structure $S_0$ State . . . . .             | S-167 |
| 8.21 | $F_{OC}$ +0.0025 au OH-AB-O <sup>-</sup> Trans Structure $S_0$ State . . . . .           | S-168 |
| 8.22 | $F_{OC}$ +0.0025 au OH-AB-O <sup>-</sup> Rotation TS Structure $S_0$ State . . . . .     | S-169 |
| 8.23 | $F_{OC}$ +0.0025 au OH-AB-O <sup>-</sup> Rotation Inversion TS Structure $S_0$ State . . | S-170 |
| 8.24 | $F_{OC}$ +0.0025 au OH-AB-O <sup>-</sup> Inversion TS Structure $S_0$ State . . . . .    | S-171 |
| 8.25 | $F_{OC}$ +0.0025 au OH-AB-O <sup>-</sup> Cis Structure $S_0$ State . . . . .             | S-172 |
| 8.26 | $F_{OC}$ +0.0050 au OH-AB-O <sup>-</sup> Trans Structure $S_0$ State . . . . .           | S-173 |
| 8.27 | $F_{OC}$ +0.0050 au OH-AB-O <sup>-</sup> Rotation TS Structure $S_0$ State . . . . .     | S-174 |
| 8.28 | $F_{OC}$ +0.0050 au OH-AB-O <sup>-</sup> Rotation Inversion TS Structure $S_0$ State . . | S-175 |
| 8.29 | $F_{OC}$ +0.0050 au OH-AB-O <sup>-</sup> Inversion TS Structure $S_0$ State . . . . .    | S-176 |
| 8.30 | $F_{OC}$ +0.0050 au OH-AB-O <sup>-</sup> Cis Structure $S_0$ State . . . . .             | S-177 |
| 8.31 | $F_{OC}$ +0.0075 au OH-AB-O <sup>-</sup> Trans Structure $S_0$ State . . . . .           | S-178 |
| 8.32 | $F_{OC}$ +0.0075 au OH-AB-O <sup>-</sup> Rotation TS Structure $S_0$ State . . . . .     | S-179 |
| 8.33 | $F_{OC}$ +0.0075 au OH-AB-O <sup>-</sup> Rotation Inversion TS Structure $S_0$ State . . | S-180 |
| 8.34 | $F_{OC}$ +0.0075 au OH-AB-O <sup>-</sup> Inversion TS Structure $S_0$ State . . . . .    | S-181 |
| 8.35 | $F_{OC}$ +0.0075 au OH-AB-O <sup>-</sup> Cis Structure $S_0$ State . . . . .             | S-182 |
| 8.36 | $F_{OC}$ +0.0100 au OH-AB-O <sup>-</sup> Trans Structure $S_0$ State . . . . .           | S-183 |
| 8.37 | $F_{OC}$ +0.0100 au OH-AB-O <sup>-</sup> Rotation TS Structure $S_0$ State . . . . .     | S-184 |
| 8.38 | $F_{OC}$ +0.0100 au OH-AB-O <sup>-</sup> Rotation Inversion TS Structure $S_0$ State . . | S-185 |
| 8.39 | $F_{OC}$ +0.0100 au OH-AB-O <sup>-</sup> Inversion TS Structure $S_0$ State . . . . .    | S-186 |
| 8.40 | $F_{OC}$ +0.0100 au OH-AB-O <sup>-</sup> Cis Structure $S_0$ State . . . . .             | S-187 |



# 1 Thermal Isomerization Pathways of 4,4'-dihydroxyazobenzene

## 1.1 Electric Field Modification of the Ground State Potential Energy Surface of HO-AB-OH

Table S1: Relative energies in kcal mol<sup>-1</sup> of optimized  $S_0$  stationary points of HO-AB-OH under  $F_{NN}$  field computed using B3LYP. Energies are shown relative to the zero-field  $S_0$  trans.

| Structure        | $F_{NN}$ field (10 <sup>-3</sup> a.u.) |       |       |       |       |       |       |       |        |
|------------------|----------------------------------------|-------|-------|-------|-------|-------|-------|-------|--------|
|                  | -10.0                                  | -7.5  | -5.0  | -2.5  | 0.0   | 2.5   | 5.0   | 7.5   | 10.0   |
| $S_0$ trans      | -1.78                                  | 0.18  | 1.12  | 1.06  | 0.00  | -2.05 | -5.10 | -9.15 | -14.23 |
| $S_0$ rot ts     | 32.99                                  | 42.71 | 45.13 | 45.93 | 45.22 | 43.00 | 39.27 | 34.01 | 27.19  |
| $S_0$ rot inv ts | 42.45                                  | 45.18 | 46.24 | 45.89 | 44.21 | 41.19 | 36.80 | 31.00 | 23.59  |
| $S_0$ inv ts     | 32.36                                  | 38.32 | 42.66 | 45.47 | 46.78 | 46.60 | 44.90 | 41.60 | 36.65  |
| $S_0$ cis        | 12.58                                  | 15.52 | 17.21 | 17.71 | 17.05 | 15.23 | 12.23 | 8.02  | 2.54   |

Table S2: Relative energies in kcal mol<sup>-1</sup> of optimized  $S_0$  stationary points of HO-AB-OH under  $F_{OC}$  field computed using B3LYP. Energies are shown relative to the zero-field  $S_0$  trans.

| Structure        | $F_{OC}$ field (10 <sup>-3</sup> a.u.) |       |       |       |       |       |       |       |        |
|------------------|----------------------------------------|-------|-------|-------|-------|-------|-------|-------|--------|
|                  | -10.0                                  | -7.5  | -5.0  | -2.5  | 0.0   | 2.5   | 5.0   | 7.5   | 10.0   |
| $S_0$ trans      | -13.48                                 | -7.51 | -3.34 | -0.86 | 0.00  | -0.75 | -3.11 | -7.17 | -13.03 |
| $S_0$ rot ts     | 38.68                                  | 42.66 | 45.03 | 45.88 | 45.22 | 43.02 | 39.24 | 33.82 | 26.70  |
| $S_0$ rot inv ts | 43.23                                  | 45.22 | 46.05 | 45.72 | 44.21 | 41.34 | 36.99 | 30.84 | 23.38  |
| $S_0$ inv ts     | 40.91                                  | 44.23 | 46.31 | 47.16 | 46.79 | 45.17 | 42.26 | 38.01 | 32.34  |
| $S_0$ cis        | 17.92                                  | 19.11 | 19.35 | 18.67 | 17.05 | 14.50 | 11.01 | 6.55  | 1.11   |

Table S3: HO-AB-OH molecules  $\Delta G$  relative barrier heights from the  $S_0$  cis structure in kcal mol<sup>-1</sup> for the three transition states examined in all two electric fields.

| Structure               | Field Strength ( $10^{-3}$ a.u.) |       |       |       |       |       |       |       |       |
|-------------------------|----------------------------------|-------|-------|-------|-------|-------|-------|-------|-------|
|                         | -10.0                            | -7.5  | -5.0  | -2.5  | 0.0   | 2.5   | 5.0   | 7.5   | 10.0  |
| $F_{NN} S_0$ rot ts     | 20.56                            | 26.90 | 27.96 | 28.44 | 28.46 | 28.05 | 27.26 | 26.11 | 24.59 |
| $F_{NN} S_0$ rot inv ts | 28.60                            | 28.14 | 27.70 | 27.02 | 26.05 | 23.38 | 22.39 | 20.78 | 18.39 |
| $F_{NN} S_0$ inv ts     | 18.78                            | 21.50 | 25.40 | 27.64 | 29.51 | 31.02 | 32.14 | 32.88 | 33.18 |
| $F_{OC} S_0$ rot ts     | 20.20                            | 23.24 | 25.80 | 27.49 | 28.46 | 28.78 | 28.43 | 27.36 | 25.45 |
| $F_{OC} S_0$ rot inv ts | 23.92                            | 24.86 | 25.63 | 26.12 | 26.05 | 23.70 | 23.47 | 21.38 | 21.12 |
| $F_{OC} S_0$ inv ts     | 22.85                            | 24.95 | 26.78 | 28.31 | 29.51 | 30.35 | 30.84 | 30.93 | 30.56 |

## 1.2 Electric Field Modification of the Ground State Potential Energy Surface of HO-AB-O<sup>-</sup>

Table S4: Relative energies in kcal mol<sup>-1</sup> of optimized  $S_0$  stationary points of HO-AB-O<sup>-</sup> under  $F_{NN}$  field computed using B3LYP. Energies are shown relative to the zero-field  $S_0$  trans.

| Structure        | $F_{NN}$ field ( $10^{-3}$ a.u.) |       |       |       |       |       |       |        |        |
|------------------|----------------------------------|-------|-------|-------|-------|-------|-------|--------|--------|
|                  | -10.0                            | -7.5  | -5.0  | -2.5  | 0.0   | 2.5   | 5.0   | 7.5    | 10.0   |
| $S_0$ trans      | 3.27                             | 4.42  | 4.25  | 2.77  | 0.00  | -4.05 | -9.35 | -15.91 | -23.70 |
| $S_0$ rot ts     | 23.55                            | 27.07 | 29.32 | 30.28 | 29.89 | 28.09 | 24.81 | 19.92  | 13.29  |
| $S_0$ rot inv ts | 46.24                            | 48.03 | 47.85 | 45.78 | 41.89 | 36.22 | 28.79 | 19.61  | 8.55   |
| $S_0$ inv ts     | 46.29                            | 48.05 | 47.79 | 45.61 | 41.58 | 35.75 | 28.14 | 18.74  | 7.43   |
| $S_0$ cis        | 24.34                            | 25.08 | 24.10 | 21.40 | 17.02 | 10.95 | 3.24  | -6.10  | -17.14 |

Table S5: Relative energies in kcal mol<sup>-1</sup> of optimized  $S_0$  stationary points of HO-AB-O<sup>-</sup> under  $F_{OC}$  field computed using B3LYP. Energies are shown relative to the zero-field  $S_0$  trans.

| Structure        | $F_{OC}$ field ( $10^{-3}$ a.u.) |       |       |       |       |       |        |        |        |
|------------------|----------------------------------|-------|-------|-------|-------|-------|--------|--------|--------|
|                  | -10.0                            | -7.5  | -5.0  | -2.5  | 0.0   | 2.5   | 5.0    | 7.5    | 10.0   |
| $S_0$ trans      | 10.09                            | 11.17 | 9.82  | 6.08  | 0.00  | -8.37 | -18.95 | -31.69 | -46.54 |
| $S_0$ rot ts     | 24.19                            | 27.88 | 30.07 | 30.77 | 29.89 | 27.33 | 22.93  | 16.46  | 7.69   |
| $S_0$ rot inv ts | 49.27                            | 50.66 | 49.75 | 46.79 | 41.89 | 35.11 | 26.47  | 15.96  | 3.49   |
| $S_0$ inv ts     | 50.33                            | 51.09 | 49.48 | 46.28 | 41.58 | 35.44 | 27.83  | 18.71  | 8.01   |
| $S_0$ cis        | 24.55                            | 24.44 | 23.13 | 20.65 | 17.02 | 12.24 | 6.32   | -0.75  | -9.02  |

Table S6: HO-AB-O<sup>-</sup> molecules  $\Delta G$  relative barrier heights from the  $S_0$  cis structure in kcal mol<sup>-1</sup> for the three transition states examined in all two electric fields.

| Structure                 | Field Strength ( $10^{-3}$ a.u.) |       |       |       |       |       |       |       |       |
|---------------------------|----------------------------------|-------|-------|-------|-------|-------|-------|-------|-------|
|                           | -10.0                            | -7.5  | -5.0  | -2.5  | 0.0   | 2.5   | 5.0   | 7.5   | 10.0  |
| $F_{NN}$ $S_0$ rot ts     | -1.52                            | 1.10  | 4.18  | 7.64  | 11.31 | 15.97 | 20.41 | 24.89 | 29.45 |
| $F_{NN}$ $S_0$ rot inv ts | 20.52                            | 21.61 | 22.45 | 23.13 | 23.71 | 24.14 | 24.38 | 24.51 | 24.46 |
| $F_{NN}$ $S_0$ inv ts     | 20.63                            | 21.70 | 22.47 | 23.04 | 23.49 | 23.76 | 23.82 | 23.71 | 23.38 |
| $F_{OC}$ $S_0$ rot ts     | -1.46                            | 2.41  | 5.95  | 9.05  | 11.31 | 13.86 | 15.53 | 16.33 | 16.28 |
| $F_{OC}$ $S_0$ rot inv ts | 22.96                            | 24.66 | 25.24 | 24.90 | 23.71 | 21.68 | 18.90 | 15.38 | 11.19 |
| $F_{OC}$ $S_0$ inv ts     | 24.32                            | 25.09 | 25.05 | 24.49 | 23.49 | 22.16 | 20.41 | 18.22 | 15.60 |

## 2 Photoisomerization Pathways of 4,4'-dihydroxyazobenzene

### 2.1 Electric Field Modification of Excited State Potential Energy

#### Surfaces of HO–AB–OH

Table S7: Relative energies in kcal mol<sup>-1</sup> of  $S_1$  and  $S_2$  transition energies from the relative  $S_0$  stationary points of HO-AB-OH under  $F_{NN}$  field computed using TD-B3LYP. Energies are shown relative to the zero-field  $S_0$  trans.

| Structure        | $F_{NN}$ field (10 <sup>-3</sup> a.u.) |       |        |        |        |        |        |        |       |
|------------------|----------------------------------------|-------|--------|--------|--------|--------|--------|--------|-------|
|                  | -10.0                                  | -7.5  | -5.0   | -2.5   | 0.0    | 2.5    | 5.0    | 7.5    | 10.0  |
| $S_1$ trans      | 59.72                                  | 61.91 | 63.02  | 63.06  | 62.03  | 59.94  | 56.79  | 52.57  | 47.25 |
| $S_1$ rot ts     | 35.96                                  | 44.72 | 48.93  | 50.49  | 50.15  | 48.04  | 44.14  | 38.38  | 30.59 |
| $S_1$ rot inv ts | 51.74                                  | 55.86 | 59.58  | 62.25  | 63.62  | 63.67  | 62.43  | 59.95  | 57.23 |
| $S_1$ inv ts     | 58.68                                  | 63.94 | 67.48  | 69.49  | 70.10  | 69.40  | 67.47  | 64.21  | 59.61 |
| $S_1$ cis        | 70.84                                  | 73.83 | 75.33  | 75.65  | 74.85  | 72.98  | 70.03  | 65.94  | 60.62 |
| $S_2$ trans      | 59.14                                  | 75.78 | 78.21  | 79.17  | 78.51  | 76.19  | 72.26  | 66.88  | 60.16 |
| $S_2$ rot ts     | 86.52                                  | 98.67 | 109.91 | 115.03 | 114.12 | 111.48 | 107.14 | 101.11 | 85.34 |
| $S_2$ rot inv ts | 63.23                                  | 80.77 | 95.41  | 102.54 | 108.14 | 112.01 | 105.27 | 89.59  | 75.63 |
| $S_2$ inv ts     | 64.56                                  | 89.25 | 105.23 | 112.73 | 113.68 | 109.33 | 103.77 | 90.06  | 72.92 |
| $S_2$ cis        | 71.79                                  | 89.15 | 102.19 | 105.61 | 106.53 | 103.16 | 97.48  | 89.64  | 78.21 |

Table S8: Relative energies in kcal mol<sup>-1</sup> of  $S_1$  and  $S_2$  transition energies from the relative  $S_0$  stationary points of HO-AB-OH under  $F_{OC}$  field computed using TD-B3LYP. Energies are shown relative to the zero-field  $S_0$  trans.

| Structure        | $F_{OC}$ field (10 <sup>-3</sup> a.u.) |       |        |        |        |        |        |        |       |
|------------------|----------------------------------------|-------|--------|--------|--------|--------|--------|--------|-------|
|                  | -10.0                                  | -7.5  | -5.0   | -2.5   | 0.0    | 2.5    | 5.0    | 7.5    | 10.0  |
| $S_1$ trans      | 39.97                                  | 53.52 | 58.29  | 61.09  | 62.03  | 61.14  | 58.40  | 53.71  | 39.39 |
| $S_1$ rot ts     | 40.79                                  | 46.34 | 49.45  | 50.67  | 50.13  | 47.80  | 43.62  | 37.43  | 28.77 |
| $S_1$ rot inv ts | 53.08                                  | 57.44 | 60.68  | 62.75  | 63.62  | 63.52  | 62.77  | 60.46  | 55.72 |
| $S_1$ inv ts     | 64.10                                  | 67.42 | 69.52  | 70.40  | 70.10  | 68.60  | 65.90  | 61.95  | 56.68 |
| $S_1$ cis        | 75.79                                  | 76.97 | 77.19  | 76.47  | 74.85  | 72.33  | 68.92  | 64.61  | 59.35 |
| $S_2$ trans      | 46.70                                  | 63.38 | 71.80  | 76.64  | 78.51  | 76.99  | 72.47  | 62.90  | 46.99 |
| $S_2$ rot ts     | 86.62                                  | 99.37 | 111.05 | 114.84 | 114.13 | 111.77 | 107.77 | 102.11 | 94.72 |
| $S_2$ rot inv ts | 67.29                                  | 84.45 | 95.83  | 102.66 | 108.13 | 112.36 | 114.05 | 110.42 | 97.61 |
| $S_2$ inv ts     | 77.46                                  | 94.47 | 107.22 | 113.53 | 113.68 | 109.53 | 104.15 | 97.53  | 89.10 |
| $S_2$ cis        | 86.42                                  | 98.60 | 106.55 | 108.36 | 106.53 | 102.35 | 96.71  | 90.22  | 82.98 |

## 2.2 Electric Field Modification of Excited State Potential Energy Surfaces of HO–AB–O<sup>-</sup>

Table S9: Relative energies in kcal mol<sup>-1</sup> of  $S_1$  and  $S_2$  transition energies from the relative  $S_0$  stationary points of deprotonated HO-AB-O<sup>-</sup> under  $F_{NN}$  field computed using TD-B3LYP. Energies are shown relative to the zero-field  $S_0$  trans.

| Structure        | $F_{NN}$ field ( $10^{-3}$ a.u.) |       |       |       |       |       |       |       |       |
|------------------|----------------------------------|-------|-------|-------|-------|-------|-------|-------|-------|
|                  | -10.0                            | -7.5  | -5.0  | -2.5  | 0.0   | 2.5   | 5.0   | 7.5   | 10.0  |
| $S_1$ trans      | 34.11                            | 48.23 | 57.62 | 62.39 | 64.49 | 60.75 | 55.74 | 49.39 | 31.66 |
| $S_1$ rot ts     | 47.86                            | 47.33 | 45.71 | 43.21 | 39.87 | 35.62 | 30.10 | 22.39 | 16.83 |
| $S_1$ rot inv ts | 61.65                            | 77.85 | 80.69 | 77.85 | 73.10 | 66.44 | 57.92 | 47.70 | 36.38 |
| $S_1$ inv ts     | 61.36                            | 77.52 | 81.25 | 78.41 | 73.61 | 66.86 | 58.19 | 47.79 | 36.20 |
| $S_1$ cis        | 51.09                            | 62.88 | 71.45 | 77.63 | 75.24 | 69.73 | 61.76 | 51.52 | 39.23 |
| $S_2$ trans      | 45.79                            | 54.32 | 64.22 | 66.91 | 64.96 | 63.00 | 58.43 | 49.47 | 41.80 |
| $S_2$ rot ts     | 49.91                            | 64.15 | 74.38 | 81.09 | 85.44 | 87.36 | 75.80 | 59.50 | 41.15 |
| $S_2$ rot inv ts | 72.41                            | 81.65 | 88.31 | 93.91 | 96.62 | 95.79 | 92.65 | 79.25 | 57.81 |
| $S_2$ inv ts     | 71.33                            | 82.07 | 87.76 | 93.57 | 96.45 | 95.62 | 92.52 | 79.19 | 57.28 |
| $S_2$ cis        | 58.16                            | 70.88 | 78.81 | 78.82 | 83.34 | 85.04 | 81.18 | 62.54 | 40.70 |

Table S10: Relative energies in kcal mol<sup>-1</sup> of  $S_1$  and  $S_2$  transition energies from the relative  $S_0$  stationary points of deprotonated HO-AB-O<sup>-</sup> under  $F_{OC}$  field computed using TD-B3LYP. Energies are shown relative to the zero-field  $S_0$  trans.

| Structure        | $F_{OC}$ field ( $10^{-3}$ a.u.) |       |       |       |       |       |       |       |       |
|------------------|----------------------------------|-------|-------|-------|-------|-------|-------|-------|-------|
|                  | -10.0                            | -7.5  | -5.0  | -2.5  | 0.0   | 2.5   | 5.0   | 7.5   | 10.0  |
| $S_1$ trans      | 16.82                            | 31.86 | 44.86 | 55.88 | 64.51 | 56.16 | 45.40 | 32.27 | 16.86 |
| $S_1$ rot ts     | 45.00                            | 50.53 | 47.94 | 44.35 | 39.88 | 34.40 | 27.25 | 18.75 | 13.00 |
| $S_1$ rot inv ts | 57.61                            | 69.50 | 80.75 | 78.33 | 73.11 | 65.78 | 56.38 | 45.06 | 32.32 |
| $S_1$ inv ts     | 59.82                            | 65.05 | 76.98 | 78.06 | 73.62 | 67.41 | 59.43 | 49.73 | 38.29 |
| $S_1$ cis        | 43.09                            | 54.41 | 65.02 | 74.66 | 75.26 | 71.46 | 65.88 | 58.50 | 47.11 |
| $S_2$ trans      | 40.31                            | 57.46 | 70.44 | 70.11 | 64.98 | 59.10 | 49.58 | 37.83 | 19.66 |
| $S_2$ rot ts     | 52.97                            | 58.29 | 69.36 | 78.47 | 85.44 | 87.92 | 73.45 | 55.37 | 34.74 |
| $S_2$ rot inv ts | 66.26                            | 82.41 | 81.50 | 89.99 | 96.62 | 96.20 | 92.01 | 71.19 | 46.55 |
| $S_2$ inv ts     | 77.68                            | 81.81 | 80.76 | 87.77 | 96.48 | 96.33 | 90.99 | 70.79 | 47.97 |
| $S_2$ cis        | 68.63                            | 76.49 | 77.87 | 77.52 | 83.34 | 85.35 | 82.51 | 66.08 | 49.51 |

### 2.3 $S_0/S_1$ Branching Space Normal Modes

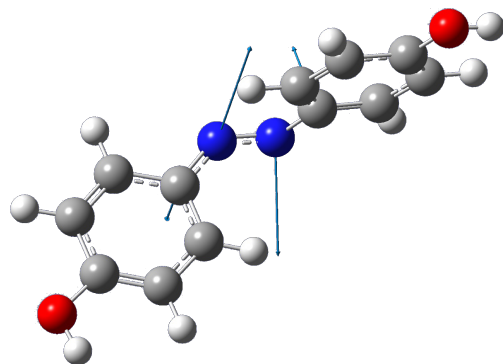

(a) Gradient Difference  $X_1$

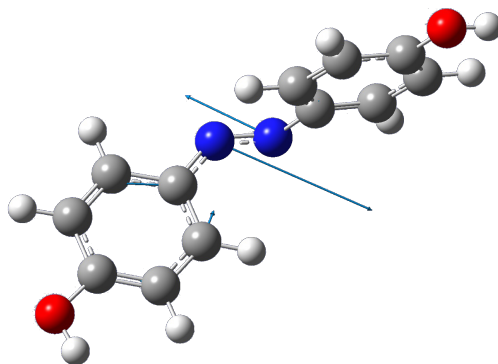

(b) Derivative Coupling  $X_2$

Figure S1: Gradient difference (a) and derivative coupling (b) vectors that define the branching space of the anti and syn protonated derivatives of AB around the  $S_0/S_1$  CI computed using CAS(10,8)/6-31+G(d)

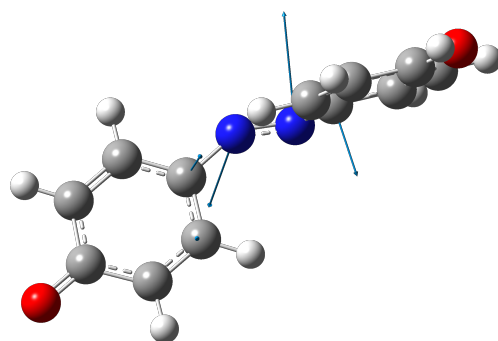

(a) Gradient Difference  $X_1$

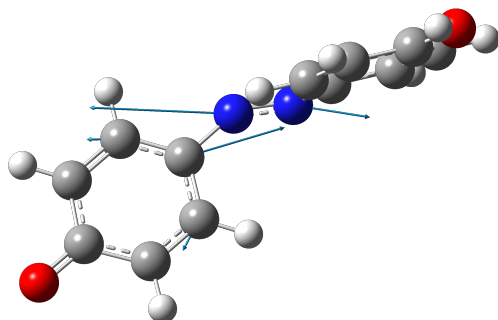

(b) Derivative Coupling  $X_2$

Figure S2: Gradient difference (a) and derivative coupling (b) vectors that define the branching space of the anti and syn deprotonated derivatives of AB around the  $S_0/S_1$  CI computed using CAS(10,8)/6-31+G(d).



## 2.4 Potential Energy Surfaces of Deprotonated Molecule Under Applied Field

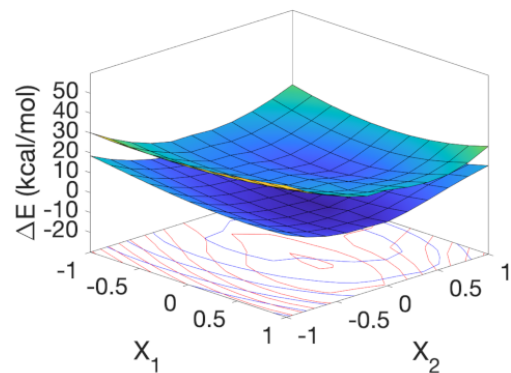

(a) OH-AB-O<sup>-</sup>  $F_{NN} = + 0.01$  au

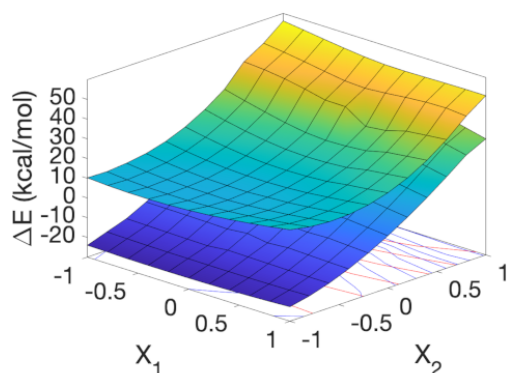

(b) OH-AB-O<sup>-</sup>  $F_{NN} = - 0.01$  au

Figure S3:  $S_0$  and  $S_1$  potential energy surfaces of HO-AB-O<sup>-</sup> under  $F_{NN}$  field in the  $S_0/S_1$  branching space. The difference between potential energy surfaces are shown in fig. ??.

### 3 Cartesian coordinates and energies of protonated OH–AB–O structures in field free conditions

#### 3.1 Field Free OH–AB–OH Trans Structure $S_0$ State

$$E_h = -723.3779$$

Cartesian Coordinates:

|   |          |          |          |
|---|----------|----------|----------|
| N | -0.00128 | 0.00192  | -0.62662 |
| N | 0.00021  | -0.00016 | 0.62917  |
| C | -1.63098 | 1.89578  | -0.53855 |
| C | -2.41183 | 2.80297  | -1.23120 |
| C | -2.41157 | 2.80258  | -2.63255 |
| C | -1.62373 | 1.88723  | -3.33267 |
| H | -0.22229 | 0.25891  | -3.15788 |
| H | -1.62424 | 1.88798  | 0.54417  |
| H | -3.03234 | 3.52400  | -0.71059 |
| H | -1.62170 | 1.88476  | -4.41983 |
| C | -0.84061 | 0.97742  | -2.63111 |
| C | -0.83271 | 0.96824  | -1.23266 |
| C | 0.83167  | -0.96659 | 1.23674  |
| C | 0.83966  | -0.97584 | 2.63818  |
| C | 1.62763  | -1.89171 | 0.54396  |
| C | 1.61912  | -1.88170 | 3.34265  |
| H | 0.22039  | -0.25602 | 3.16217  |
| C | 2.40834  | -2.79906 | 1.24276  |
| H | 1.62296  | -1.88635 | -0.53884 |
| C | 2.40720  | -2.79771 | 2.64428  |
| H | 1.63032  | -1.89469 | 4.42646  |
| H | 3.02392  | -3.51464 | 0.70212  |
| O | 3.15800  | -3.67052 | 3.37796  |
| H | 3.66018  | -4.25460 | 2.79682  |
| O | -3.20427 | 3.72357  | -3.25436 |
| H | -3.13162 | 3.63913  | -4.21287 |

### 3.2 Field Free OH–AB–OH Rotation TS Structure $S_0$ State

$$E_h = -723.3058$$

Cartesian Coordinates:

|   |          |          |          |
|---|----------|----------|----------|
| N | -1.28728 | -1.24392 | -0.54024 |
| N | -1.28728 | -1.24392 | 0.76630  |
| C | 1.15263  | -1.26580 | -0.62002 |
| C | 2.29877  | -1.23145 | -1.39471 |
| C | 2.21155  | -1.30819 | -2.78695 |
| C | 0.95370  | -1.40757 | -3.40982 |
| H | -1.17134 | -1.49208 | -3.12017 |
| H | 1.21557  | -1.19841 | 0.45836  |
| H | 3.27802  | -1.13704 | -0.93806 |
| H | 0.88895  | -1.46442 | -4.49399 |
| C | -0.19616 | -1.42354 | -2.65148 |
| C | -0.13279 | -1.34011 | -1.23199 |
| C | -1.29239 | -0.00756 | 1.34283  |
| C | -1.29261 | 0.04453  | 2.76556  |
| C | -1.15967 | 1.21197  | 0.62686  |
| C | -1.16027 | 1.23862  | 3.43475  |
| H | -1.38562 | -0.88937 | 3.30851  |
| C | -1.02470 | 2.41053  | 1.30960  |
| H | -1.14064 | 1.19170  | -0.45433 |
| C | -1.02815 | 2.43479  | 2.70796  |
| H | -1.14680 | 1.28086  | 4.51796  |
| H | -0.89582 | 3.33608  | 0.75287  |
| O | -0.87577 | 3.58229  | 3.42606  |
| H | -0.80380 | 4.34360  | 2.83696  |
| O | 3.37642  | -1.25489 | -3.49642 |
| H | 3.19879  | -1.31257 | -4.44316 |

### 3.3 Field Free OH-AB-OH Rotation Inversion TS Structure $S_0$ State

$$E_h = -723.3074$$

Cartesian Coordinates:

|   |          |          |          |
|---|----------|----------|----------|
| N | 0.98742  | -0.75489 | -1.29485 |
| N | 0.98742  | -0.75489 | -0.07228 |
| C | -0.84900 | 0.96675  | -1.32185 |
| C | -1.70375 | 1.76260  | -2.06295 |
| C | -1.65223 | 1.72376  | -3.46387 |
| C | -0.74243 | 0.88597  | -4.11454 |
| H | 0.82839  | -0.57107 | -3.84266 |
| H | -0.87867 | 0.99026  | -0.23775 |
| H | -2.41907 | 2.42253  | -1.58523 |
| H | -0.70390 | 0.85844  | -5.20046 |
| C | 0.11322  | 0.08885  | -3.36327 |
| C | 0.06416  | 0.12458  | -1.97068 |
| C | 0.91462  | -0.84606 | 1.26123  |
| C | 1.63007  | 0.04990  | 2.09602  |
| C | 0.13967  | -1.85914 | 1.87526  |
| C | 1.56902  | -0.07683 | 3.47598  |
| H | 2.23699  | 0.82723  | 1.64663  |
| C | 0.07882  | -1.94578 | 3.26332  |
| H | -0.40862 | -2.56213 | 1.25947  |
| C | 0.79122  | -1.06649 | 4.07463  |
| H | 2.12842  | 0.60600  | 4.10653  |
| H | -0.53367 | -2.72718 | 3.70829  |
| O | 0.76774  | -1.11847 | 5.45464  |
| H | 0.22728  | -1.86160 | 5.74597  |
| O | -2.51953 | 2.53118  | -4.13442 |
| H | -2.40703 | 2.43576  | -5.08823 |

### 3.4 Field Free OH–AB–OH Inversion TS Structure $S_0$ State

$$E_h = -723.3033$$

Cartesian Coordinates:

|   |          |          |          |
|---|----------|----------|----------|
| N | 0.96424  | -0.91484 | -1.28492 |
| N | 0.96437  | -0.91475 | -0.03953 |
| C | -0.47814 | 1.15997  | -1.41711 |
| C | -1.26535 | 2.00272  | -2.18651 |
| C | -1.49703 | 1.69882  | -3.53255 |
| C | -0.91811 | 0.56302  | -4.10442 |
| H | 0.36327  | -1.13982 | -3.75701 |
| H | -0.27945 | 1.40393  | -0.37992 |
| H | -1.70414 | 2.90355  | -1.77120 |
| H | -1.09056 | 0.33124  | -5.15286 |
| C | -0.11191 | -0.26294 | -3.32941 |
| C | 0.09635  | 0.01111  | -1.97642 |
| C | 0.87055  | -0.84421 | 1.30279  |
| C | 1.81204  | -1.54989 | 2.10133  |
| C | -0.20004 | -0.20725 | 1.98361  |
| C | 1.72801  | -1.56847 | 3.48005  |
| H | 2.61295  | -2.07128 | 1.59015  |
| C | -0.31781 | -0.26954 | 3.36405  |
| H | -0.95668 | 0.31024  | 1.40633  |
| C | 0.65572  | -0.93320 | 4.11829  |
| H | 2.45912  | -2.09492 | 4.08340  |
| H | -1.15890 | 0.20865  | 3.86119  |
| O | 0.60919  | -1.00467 | 5.47713  |
| H | -0.16964 | -0.54580 | 5.81538  |
| O | -2.29025 | 2.55913  | -4.23880 |
| H | -2.37570 | 2.26312  | -5.15314 |

### 3.5 Field Free OH-AB-OH Cis Structure $S_0$ State

$$E_h = -723.3507$$

Cartesian Coordinates:

|   |          |          |          |
|---|----------|----------|----------|
| N | 0.50021  | -2.26792 | -0.35763 |
| N | 0.48368  | -2.12615 | 0.88121  |
| C | 1.05689  | 0.02044  | -1.20722 |
| C | 0.99868  | 0.94203  | -2.24162 |
| C | 0.23050  | 0.67203  | -3.37782 |
| C | -0.44775 | -0.54381 | -3.48659 |
| H | -0.83621 | -2.44826 | -2.55834 |
| H | 1.65727  | 0.23880  | -0.33244 |
| H | 1.54485  | 1.87711  | -2.18778 |
| H | -1.02743 | -0.77016 | -4.37813 |
| C | -0.35143 | -1.48245 | -2.46487 |
| C | 0.36373  | -1.19628 | -1.29893 |
| C | 0.11487  | -0.91722 | 1.55456  |
| C | 0.83430  | -0.60312 | 2.71474  |
| C | -1.02094 | -0.16423 | 1.23505  |
| C | 0.48373  | 0.48823  | 3.49597  |
| H | 1.67870  | -1.22623 | 2.98927  |
| C | -1.40135 | 0.90416  | 2.03878  |
| H | -1.61915 | -0.41978 | 0.36890  |
| C | -0.63985 | 1.24652  | 3.15972  |
| H | 1.05101  | 0.75095  | 4.38161  |
| H | -2.29490 | 1.47256  | 1.79201  |
| O | -0.95586 | 2.29750  | 3.97413  |
| H | -1.75058 | 2.74299  | 3.65661  |
| O | 0.19872  | 1.62850  | -4.35372 |
| H | -0.33795 | 1.33202  | -5.09870 |

## 4 Cartesian coordinates and energies of protonated OH–AB–O structures in $F_{NN}$ conditions

### 4.1 $F_{NN}$ -0.0025 au OH–AB–OH Trans Structure $S_0$ State

$$E_h = -723.3762$$

Cartesian Coordinates:

|   |          |          |          |
|---|----------|----------|----------|
| N | 0.00150  | -0.00132 | -0.63066 |
| N | 0.00338  | -0.00390 | 0.62536  |
| C | -1.62836 | 1.89274  | -0.53993 |
| C | -2.41136 | 2.80247  | -1.22830 |
| C | -2.41368 | 2.80505  | -2.62828 |
| C | -1.62746 | 1.89152  | -3.33150 |
| H | -0.22429 | 0.26115  | -3.16326 |
| H | -1.61943 | 1.88244  | 0.54280  |
| H | -3.02996 | 3.52134  | -0.70242 |
| H | -1.62825 | 1.89234  | -4.41940 |
| C | -0.84197 | 0.97894  | -2.63426 |
| C | -0.83119 | 0.96643  | -1.23682 |
| C | 0.83377  | -0.96904 | 1.23134  |
| C | 0.83929  | -0.97546 | 2.63405  |
| C | 1.63097  | -1.89557 | 0.54076  |
| C | 1.61671  | -1.87893 | 3.34160  |
| H | 0.21962  | -0.25525 | 3.15654  |
| C | 2.41006  | -2.80100 | 1.24284  |
| H | 1.62802  | -1.89218 | -0.54206 |
| C | 2.40631  | -2.79665 | 2.64589  |
| H | 1.62636  | -1.89013 | 4.42513  |
| H | 3.02729  | -3.51845 | 0.70658  |
| O | 3.15254  | -3.66407 | 3.38291  |
| H | 3.65940  | -4.25378 | 2.81161  |
| O | -3.20829 | 3.72828  | -3.25288 |
| H | -3.13056 | 3.63791  | -4.20995 |

## 4.2 $F_{NN}$ -0.0025 au OH-AB-OH Rotation TS Structure $S_0$ State

$$E_h = -723.3047$$

Cartesian Coordinates:

|   |          |          |          |
|---|----------|----------|----------|
| N | -1.28836 | -1.23016 | -0.54525 |
| N | -1.28807 | -1.23316 | 0.76130  |
| C | 1.15148  | -1.24146 | -0.62737 |
| C | 2.30043  | -1.21838 | -1.40218 |
| C | 2.21675  | -1.31433 | -2.79091 |
| C | 0.96040  | -1.42194 | -3.41194 |
| H | -1.16653 | -1.50687 | -3.12617 |
| H | 1.21731  | -1.16182 | 0.44995  |
| H | 3.27755  | -1.12217 | -0.94112 |
| H | 0.89660  | -1.49614 | -4.49593 |
| C | -0.19270 | -1.42796 | -2.65578 |
| C | -0.13397 | -1.32588 | -1.23757 |
| C | -1.29187 | 0.00132  | 1.34042  |
| C | -1.29169 | 0.04312  | 2.76421  |
| C | -1.16312 | 1.22444  | 0.62889  |
| C | -1.16013 | 1.23185  | 3.44058  |
| H | -1.38299 | -0.89431 | 3.30095  |
| C | -1.02905 | 2.41755  | 1.31682  |
| H | -1.14745 | 1.20637  | -0.45251 |
| C | -1.03152 | 2.43234  | 2.71846  |
| H | -1.14550 | 1.26984  | 4.52361  |
| H | -0.90126 | 3.34798  | 0.76822  |
| O | -0.88323 | 3.56978  | 3.44065  |
| H | -0.81217 | 4.34083  | 2.86393  |
| O | 3.38575  | -1.27256 | -3.50843 |
| H | 3.19662  | -1.36416 | -4.44961 |



### 4.3 $F_{NN}$ -0.0025 au OH–AB–OH Rotation Inversion TS Structure

#### $S_0$ State

$$E_h = -723.3047$$

Cartesian Coordinates:

|   |          |          |          |
|---|----------|----------|----------|
| N | 0.98068  | -0.76500 | -1.29450 |
| N | 0.98199  | -0.76292 | -0.07336 |
| C | -0.86293 | 0.95614  | -1.32598 |
| C | -1.71750 | 1.75499  | -2.06670 |
| C | -1.65389 | 1.72813  | -3.46568 |
| C | -0.73581 | 0.90023  | -4.11611 |
| H | 0.83924  | -0.55580 | -3.84260 |
| H | -0.89966 | 0.96982  | -0.24183 |
| H | -2.43946 | 2.40631  | -1.58706 |
| H | -0.68890 | 0.88356  | -5.20264 |
| C | 0.11736  | 0.09869  | -3.36505 |
| C | 0.05788  | 0.12376  | -1.97424 |
| C | 0.90968  | -0.85176 | 1.26690  |
| C | 1.63275  | 0.04199  | 2.09362  |
| C | 0.13904  | -1.86416 | 1.88106  |
| C | 1.57652  | -0.08176 | 3.47356  |
| H | 2.24025  | 0.81698  | 1.64082  |
| C | 0.07847  | -1.94682 | 3.27034  |
| H | -0.41081 | -2.56868 | 1.26821  |
| C | 0.79548  | -1.06707 | 4.07789  |
| H | 2.14016  | 0.59869  | 4.10245  |
| H | -0.53490 | -2.72487 | 3.71872  |
| O | 0.78021  | -1.10797 | 5.45136  |
| H | 0.23021  | -1.83546 | 5.76444  |
| O | -2.52035 | 2.53776  | -4.14379 |
| H | -2.38917 | 2.44447  | -5.09493 |

#### 4.4 $F_{NN}$ -0.0025 au OH-AB-OH Inversion TS Structure $S_0$ State

$$E_h = -723.3054$$

Cartesian Coordinates:

|   |          |          |          |
|---|----------|----------|----------|
| N | 0.97838  | -0.90249 | -1.28268 |
| N | 0.96859  | -0.91227 | -0.03756 |
| C | -0.47020 | 1.17109  | -1.42158 |
| C | -1.25713 | 2.01446  | -2.19349 |
| C | -1.49329 | 1.70442  | -3.53543 |
| C | -0.92085 | 0.56370  | -4.10263 |
| H | 0.35655  | -1.14330 | -3.74915 |
| H | -0.27131 | 1.41683  | -0.38476 |
| H | -1.69316 | 2.91684  | -1.77852 |
| H | -1.09958 | 0.32646  | -5.14961 |
| C | -0.11487 | -0.26190 | -3.32583 |
| C | 0.09960  | 0.01840  | -1.97591 |
| C | 0.86303  | -0.85379 | 1.30443  |
| C | 1.81032  | -1.55268 | 2.10292  |
| C | -0.20802 | -0.21549 | 1.98499  |
| C | 1.72657  | -1.57119 | 3.48005  |
| H | 2.61545  | -2.06808 | 1.59228  |
| C | -0.32437 | -0.27366 | 3.36412  |
| H | -0.96553 | 0.30066  | 1.40725  |
| C | 0.65218  | -0.93675 | 4.11968  |
| H | 2.46009  | -2.09091 | 4.08590  |
| H | -1.16413 | 0.20468  | 3.86226  |
| O | 0.61306  | -1.00964 | 5.47100  |
| H | -0.15887 | -0.55181 | 5.82740  |
| O | -2.28590 | 2.56448  | -4.25252 |
| H | -2.39452 | 2.23587  | -5.15270 |

#### 4.5 $F_{NN}$ -0.0025 au OH-AB-OH Cis Structure $S_0$ State

$$E_h = -723.3496$$

Cartesian Coordinates:

|   |          |          |          |
|---|----------|----------|----------|
| N | 0.52793  | -2.25981 | -0.35359 |
| N | 0.50698  | -2.11993 | 0.88487  |
| C | 1.10046  | 0.01115  | -1.22644 |
| C | 1.04356  | 0.92880  | -2.26607 |
| C | 0.24601  | 0.67038  | -3.38259 |
| C | -0.46753 | -0.52593 | -3.46683 |
| H | -0.89196 | -2.41188 | -2.51391 |
| H | 1.71937  | 0.22078  | -0.36230 |
| H | 1.60967  | 1.85270  | -2.22487 |
| H | -1.07541 | -0.74109 | -4.34300 |
| C | -0.37601 | -1.46046 | -2.43993 |
| C | 0.37589  | -1.18794 | -1.29497 |
| C | 0.11853  | -0.92006 | 1.55783  |
| C | 0.83291  | -0.59811 | 2.72017  |
| C | -1.01778 | -0.17234 | 1.22724  |
| C | 0.47473  | 0.49487  | 3.49341  |
| H | 1.67548  | -1.21890 | 3.00469  |
| C | -1.40790 | 0.89636  | 2.02550  |
| H | -1.61307 | -0.43677 | 0.36164  |
| C | -0.65274 | 1.24641  | 3.14958  |
| H | 1.03244  | 0.76148  | 4.38366  |
| H | -2.30532 | 1.45724  | 1.77613  |
| O | -0.97246 | 2.29539  | 3.95756  |
| H | -1.80057 | 2.70516  | 3.67936  |
| O | 0.21710  | 1.61867  | -4.37449 |
| H | -0.38657 | 1.34204  | -5.07389 |

## 4.6 $F_{NN}$ -0.0050 au OH-AB-OH Trans Structure $S_0$ State

$$E_h = -723.3761$$

Cartesian Coordinates:

|   |          |          |          |
|---|----------|----------|----------|
| N | 0.00412  | -0.00440 | -0.63493 |
| N | 0.00646  | -0.00751 | 0.62198  |
| C | -1.62564 | 1.88957  | -0.54117 |
| C | -2.41084 | 2.80187  | -1.22532 |
| C | -2.41550 | 2.80718  | -2.62399 |
| C | -1.63097 | 1.89561  | -3.33056 |
| H | -0.22617 | 0.26329  | -3.16902 |
| H | -1.61447 | 1.87666  | 0.54155  |
| H | -3.02748 | 3.51848  | -0.69410 |
| H | -1.63474 | 1.89988  | -4.41919 |
| C | -0.84313 | 0.98026  | -2.63764 |
| C | -0.82934 | 0.96425  | -1.24077 |
| C | 0.83550  | -0.97109 | 1.22612  |
| C | 0.83894  | -0.97508 | 2.63044  |
| C | 1.63402  | -1.89912 | 0.53773  |
| C | 1.61426  | -1.87607 | 3.34081  |
| H | 0.21884  | -0.25438 | 3.15147  |
| C | 2.41140  | -2.80255 | 1.24284  |
| H | 1.63288  | -1.89784 | -0.54523 |
| C | 2.40555  | -2.79574 | 2.64764  |
| H | 1.62252  | -1.88566 | 4.42427  |
| H | 3.03016  | -3.52177 | 0.71055  |
| O | 3.14720  | -3.65781 | 3.38729  |
| H | 3.65857  | -4.25278 | 2.82554  |
| O | -3.21223 | 3.73291  | -3.25143 |
| H | -3.12949 | 3.63670  | -4.20716 |

#### 4.7 $F_{NN}$ -0.0050 au OH-AB-OH Rotation TS Structure $S_0$ State

$$E_h = -723.3059$$

Cartesian Coordinates:

|   |          |          |          |
|---|----------|----------|----------|
| N | -1.28506 | -1.20793 | -0.55374 |
| N | -1.28397 | -1.21695 | 0.75400  |
| C | 1.15540  | -1.20799 | -0.64076 |
| C | 2.30604  | -1.20410 | -1.41676 |
| C | 2.22403  | -1.32428 | -2.80171 |
| C | 0.96804  | -1.43580 | -3.41924 |
| H | -1.16058 | -1.51497 | -3.13429 |
| H | 1.22601  | -1.11420 | 0.43510  |
| H | 3.28202  | -1.11013 | -0.95256 |
| H | 0.90369  | -1.52954 | -4.50264 |
| C | -0.18728 | -1.42605 | -2.66385 |
| C | -0.13165 | -1.30145 | -1.24691 |
| C | -1.28631 | 0.01344  | 1.33811  |
| C | -1.28522 | 0.04134  | 2.76354  |
| C | -1.16741 | 1.24368  | 0.63498  |
| C | -1.16048 | 1.22321  | 3.45087  |
| H | -1.37067 | -0.90155 | 3.29138  |
| C | -1.04063 | 2.42941  | 1.33168  |
| H | -1.15593 | 1.23154  | -0.44673 |
| C | -1.04232 | 2.43087  | 2.73726  |
| H | -1.14531 | 1.25365  | 4.53398  |
| H | -0.91999 | 3.36719  | 0.79417  |
| O | -0.90571 | 3.55723  | 3.46639  |
| H | -0.84043 | 4.34001  | 2.90457  |
| O | 3.39662  | -1.30083 | -3.52868 |
| H | 3.20039  | -1.48170 | -4.45492 |

## 4.8 $F_{NN}$ -0.0050 au OH–AB–OH Rotation Inversion TS Structure

### $S_0$ State

$$E_h = -723.3042$$

Cartesian Coordinates:

|   |          |          |          |
|---|----------|----------|----------|
| N | 0.9662   | -0.77731 | -1.29243 |
| N | 0.96890  | -0.77086 | -0.07230 |
| C | -0.88369 | 0.94444  | -1.33268 |
| C | -1.73664 | 1.74550  | -2.07552 |
| C | -1.65532 | 1.73287  | -3.47223 |
| C | -0.72502 | 0.91714  | -4.11971 |
| H | 0.85445  | -0.53659 | -3.84021 |
| H | -0.93137 | 0.94745  | -0.24873 |
| H | -2.46808 | 2.38643  | -1.59610 |
| H | -0.66514 | 0.91335  | -5.20663 |
| C | 0.12352  | 0.11137  | -3.36655 |
| C | 0.04884  | 0.12392  | -1.97749 |
| C | 0.89676  | -0.85441 | 1.27460  |
| C | 1.63222  | 0.03497  | 2.09201  |
| C | 0.13436  | -1.86846 | 1.89154  |
| C | 1.58794  | -0.08872 | 3.47182  |
| H | 2.23921  | 0.80762  | 1.63433  |
| C | 0.07804  | -1.94758 | 3.28186  |
| H | -0.41855 | -2.57447 | 1.28291  |
| C | 0.80474  | -1.06945 | 4.08406  |
| H | 2.16047  | 0.58691  | 4.09751  |
| H | -0.53575 | -2.72168 | 3.73539  |
| O | 0.80362  | -1.10162 | 5.45080  |
| H | 0.24774  | -1.81461 | 5.78715  |
| O | -2.51952 | 2.54405  | -4.16055 |
| H | -2.36133 | 2.45898  | -5.10796 |

#### 4.9 $F_{NN}$ -0.0050 au OH-AB-OH Inversion TS Structure $S_0$ State

$$E_h = -723.3099$$

Cartesian Coordinates:

|   |          |          |          |
|---|----------|----------|----------|
| N | 0.98887  | -0.89106 | -1.28011 |
| N | 0.97110  | -0.90902 | -0.03456 |
| C | -0.46294 | 1.18315  | -1.42669 |
| C | -1.24744 | 2.02757  | -2.20274 |
| C | -1.48624 | 1.71165  | -3.54113 |
| C | -0.92054 | 0.56524  | -4.10258 |
| H | 0.34919  | -1.14780 | -3.74023 |
| H | -0.26571 | 1.43082  | -0.38991 |
| H | -1.68095 | 2.93172  | -1.78878 |
| H | -1.10357 | 0.32311  | -5.14867 |
| C | -0.11788 | -0.26104 | -3.32226 |
| C | 0.10149  | 0.02518  | -1.97458 |
| C | 0.85620  | -0.86059 | 1.30584  |
| C | 1.80898  | -1.55432 | 2.10467  |
| C | -0.21558 | -0.22160 | 1.98800  |
| C | 1.72577  | -1.57425 | 3.47993  |
| H | 2.61780  | -2.06399 | 1.59404  |
| C | -0.33034 | -0.27742 | 3.36564  |
| H | -0.97442 | 0.29363  | 1.41070  |
| C | 0.64919  | -0.94108 | 4.12207  |
| H | 2.46123  | -2.08880 | 4.08757  |
| H | -1.16886 | 0.20037  | 3.86546  |
| O | 0.61714  | -1.01752 | 5.46581  |
| H | -0.14823 | -0.56251 | 5.84120  |
| O | -2.27535 | 2.57240  | -4.27125 |
| H | -2.42681 | 2.20011  | -5.14757 |

#### 4.10 $F_{NN}$ -0.0050 au OH-AB-OH Cis Structure $S_0$ State

$$E_h = -723.3504$$

Cartesian Coordinates:

|   |          |          |          |
|---|----------|----------|----------|
| N | 0.55211  | -2.24937 | -0.34995 |
| N | 0.52699  | -2.11163 | 0.88882  |
| C | 1.14145  | 0.00349  | -1.24796 |
| C | 1.08808  | 0.91376  | -2.29589 |
| C | 0.26544  | 0.66395  | -3.39423 |
| C | -0.48135 | -0.51247 | -3.45220 |
| H | -0.94387 | -2.37469 | -2.46845 |
| H | 1.77674  | 0.20697  | -0.39409 |
| H | 1.67300  | 1.82651  | -2.26859 |
| H | -1.11276 | -0.71908 | -4.31449 |
| C | -0.39799 | -1.43845 | -2.41622 |
| C | 0.38649  | -1.17758 | -1.29073 |
| C | 0.12140  | -0.92118 | 1.56125  |
| C | 0.83114  | -0.59260 | 2.72611  |
| C | -1.01603 | -0.17814 | 1.22158  |
| C | 0.46558  | 0.50075  | 3.49315  |
| H | 1.67208  | -1.21123 | 3.01939  |
| C | -1.41595 | 0.88894  | 2.01651  |
| H | -1.60926 | -0.45095 | 0.35700  |
| C | -0.66653 | 1.24538  | 3.14399  |
| H | 1.01445  | 0.77034  | 4.38783  |
| H | -2.31814 | 1.44170  | 1.76675  |
| O | -0.99034 | 2.29071  | 3.94766  |
| H | -1.84535 | 2.66867  | 3.70789  |
| O | 0.24204  | 1.59985  | -4.40647 |
| H | -0.44567 | 1.36457  | -5.03989 |



#### 4.11 $F_{NN}$ -0.0075 au OH-AB-OH Trans Structure $S_0$ State

$$E_h = -723.3776$$

Cartesian Coordinates:

|   |          |          |          |
|---|----------|----------|----------|
| N | 0.00689  | -0.00767 | -0.63998 |
| N | 0.00973  | -0.01134 | 0.61843  |
| C | -1.62257 | 1.88598  | -0.54253 |
| C | -2.40997 | 2.80088  | -1.22188 |
| C | -2.41751 | 2.80955  | -2.61954 |
| C | -1.63476 | 1.90002  | -3.32979 |
| H | -0.22825 | 0.26566  | -3.17597 |
| H | -1.60899 | 1.87026  | 0.54024  |
| H | -3.02453 | 3.51508  | -0.68494 |
| H | -1.64182 | 1.90813  | -4.41936 |
| C | -0.84436 | 0.98166  | -2.64169 |
| C | -0.82697 | 0.96144  | -1.24518 |
| C | 0.83716  | -0.97306 | 1.22048  |
| C | 0.83846  | -0.97455 | 2.62669  |
| C | 1.63725  | -1.90291 | 0.53442  |
| C | 1.61161  | -1.87299 | 3.34021  |
| H | 0.21792  | -0.25334 | 3.14626  |
| C | 2.41282  | -2.80420 | 1.24283  |
| H | 1.63802  | -1.90384 | -0.54868 |
| C | 2.40458  | -2.79460 | 2.64961  |
| H | 1.61843  | -1.88088 | 4.42365  |
| H | 3.03316  | -3.52523 | 0.71471  |
| O | 3.14157  | -3.65120 | 3.39221  |
| H | 3.65774  | -4.25173 | 2.84077  |
| O | -3.21638 | 3.73781  | -3.24943 |
| H | -3.12880 | 3.63597  | -4.20385 |

## 4.12 $F_{NN}$ -0.0075 au OH-AB-OH Rotation TS Structure $S_0$ State

$$E_h = -723.3098$$

Cartesian Coordinates:

|   |          |          |          |
|---|----------|----------|----------|
| N | -1.27796 | -1.17222 | -0.56945 |
| N | -1.27363 | -1.19294 | 0.74008  |
| C | 1.16283  | -1.14490 | -0.66792 |
| C | 2.31307  | -1.16844 | -1.44764 |
| C | 2.23072  | -1.32796 | -2.82672 |
| C | 0.97363  | -1.44741 | -3.43726 |
| H | -1.15592 | -1.52338 | -3.14740 |
| H | 1.24126  | -1.02881 | 0.40522  |
| H | 3.28917  | -1.07529 | -0.98297 |
| H | 0.90781  | -1.56674 | -4.51897 |
| C | -0.18211 | -1.41674 | -2.68061 |
| C | -0.12706 | -1.25816 | -1.26571 |
| C | -1.27593 | 0.03048  | 1.33432  |
| C | -1.27131 | 0.03579  | 2.76189  |
| C | -1.17561 | 1.27277  | 0.64704  |
| C | -1.15877 | 1.20671  | 3.46766  |
| H | -1.34529 | -0.91615 | 3.27488  |
| C | -1.06179 | 2.44701  | 1.35956  |
| H | -1.17164 | 1.27374  | -0.43501 |
| C | -1.06005 | 2.42617  | 2.76964  |
| H | -1.14193 | 1.22321  | 4.55099  |
| H | -0.95658 | 3.39588  | 0.83883  |
| O | -0.94208 | 3.53719  | 3.51224  |
| H | -0.88965 | 4.33625  | 2.97175  |
| O | 3.40526  | -1.32806 | -3.56920 |
| H | 3.23685  | -1.76388 | -4.41197 |

### 4.13 $F_{NN}$ -0.0075 au OH-AB-OH Rotation Inversion TS Structure $S_0$ State

$$E_h = -723.3058$$

Cartesian Coordinates:

|   |          |          |          |
|---|----------|----------|----------|
| N | 0.93749  | -0.79276 | -1.28702 |
| N | 0.94164  | -0.77800 | -0.06686 |
| C | -0.91509 | 0.93107  | -1.34343 |
| C | -1.76528 | 1.73164  | -2.09279 |
| C | -1.65748 | 1.73662  | -3.48617 |
| C | -0.70760 | 0.93773  | -4.12583 |
| H | 0.87806  | -0.50962 | -3.83352 |
| H | -0.98008 | 0.92273  | -0.26027 |
| H | -2.51138 | 2.35855  | -1.61719 |
| H | -0.62763 | 0.94938  | -5.21255 |
| C | 0.13404  | 0.12938  | -3.36689 |
| C | 0.03680  | 0.12670  | -1.97962 |
| C | 0.86883  | -0.85095 | 1.28521  |
| C | 1.62621  | 0.02931  | 2.09123  |
| C | 0.12331  | -1.87213 | 1.90981  |
| C | 1.60727  | -0.09996 | 3.47009  |
| H | 2.23032  | 0.79976  | 1.62584  |
| C | 0.07756  | -1.94809 | 3.30054  |
| H | -0.43508 | -2.57958 | 1.30760  |
| C | 0.82320  | -1.07525 | 4.09417  |
| H | 2.19740  | 0.56576  | 4.08977  |
| H | -0.53604 | -2.71670 | 3.76263  |
| O | 0.84699  | -1.10301 | 5.45317  |
| H | 0.28419  | -1.79805 | 5.81606  |
| O | -2.51890 | 2.54618  | -4.18962 |
| H | -2.31218 | 2.48854  | -5.12946 |

#### 4.14 $F_{NN}$ -0.0075 au OH-AB-OH Inversion TS Structure $S_0$ State

$$E_h = -723.3168$$

Cartesian Coordinates:

|   |          |          |          |
|---|----------|----------|----------|
| N | 0.99790  | -0.87954 | -1.27765 |
| N | 0.97324  | -0.90432 | -0.03074 |
| C | -0.45235 | 1.19794  | -1.43342 |
| C | -1.23268 | 2.04344  | -2.21527 |
| C | -1.47453 | 1.72047  | -3.54989 |
| C | -0.91689 | 0.56694  | -4.10410 |
| H | 0.34123  | -1.15406 | -3.73004 |
| H | -0.25727 | 1.44859  | -0.39681 |
| H | -1.66318 | 2.95009  | -1.80338 |
| H | -1.10317 | 0.31995  | -5.14957 |
| C | -0.11993 | -0.26053 | -3.31873 |
| C | 0.10476  | 0.03235  | -1.97291 |
| C | 0.85052  | -0.86419 | 1.30688  |
| C | 1.80809  | -1.55450 | 2.10685  |
| C | -0.22290 | -0.22552 | 1.99180  |
| C | 1.72460  | -1.57787 | 3.47989  |
| H | 2.62055  | -2.05838 | 1.59612  |
| C | -0.33698 | -0.28119 | 3.36763  |
| H | -0.98293 | 0.28946  | 1.41527  |
| C | 0.64501  | -0.94695 | 4.12497  |
| H | 2.46121  | -2.08871 | 4.08909  |
| H | -1.17465 | 0.19521  | 3.86937  |
| O | 0.61892  | -1.02923 | 5.46092  |
| H | -0.14034 | -0.57896 | 5.85596  |
| O | -2.25814 | 2.58220  | -4.29570 |
| H | -2.48801 | 2.15124  | -5.12663 |

#### 4.15 $F_{NN}$ -0.0075 au OH-AB-OH Cis Structure $S_0$ State

$$E_h = -723.3531$$

Cartesian Coordinates:

|   |          |          |          |
|---|----------|----------|----------|
| N | 0.57605  | -2.23714 | -0.34609 |
| N | 0.54650  | -2.10112 | 0.89345  |
| C | 1.18375  | -0.00540 | -1.27306 |
| C | 1.13482  | 0.89422  | -2.33207 |
| C | 0.28764  | 0.65185  | -3.41156 |
| C | -0.49247 | -0.50300 | -3.44015 |
| H | -0.99526 | -2.33552 | -2.41935 |
| H | 1.83599  | 0.19277  | -0.43059 |
| H | 1.73908  | 1.79480  | -2.32133 |
| H | -1.14548 | -0.70229 | -4.28873 |
| C | -0.41898 | -1.41641 | -2.39191 |
| C | 0.39740  | -1.16652 | -1.28613 |
| C | 0.12419  | -0.92051 | 1.56452  |
| C | 0.82926  | -0.58517 | 2.73223  |
| C | -1.01522 | -0.18248 | 1.21681  |
| C | 0.45548  | 0.50730  | 3.49431  |
| H | 1.66931  | -1.20099 | 3.03343  |
| C | -1.42616 | 0.88106  | 2.01004  |
| H | -1.60664 | -0.46363 | 0.35346  |
| C | -0.68272 | 1.24353  | 3.14139  |
| H | 0.99586  | 0.77991  | 4.39320  |
| H | -2.33412 | 1.42447  | 1.76112  |
| O | -1.01229 | 2.28352  | 3.94240  |
| H | -1.88911 | 2.63238  | 3.73922  |
| O | 0.26927  | 1.57203  | -4.44774 |
| H | -0.51242 | 1.41058  | -4.98810 |

#### 4.16 $F_{NN}$ -0.0100 au OH-AB-OH Trans Structure $S_0$ State

$$E_h = -723.3807$$

Cartesian Coordinates:

|   |          |          |          |
|---|----------|----------|----------|
| N | 0.00977  | -0.01106 | -0.64566 |
| N | 0.01311  | -0.01531 | 0.61490  |
| C | -1.61915 | 1.88198  | -0.54398 |
| C | -2.40882 | 2.79955  | -1.21814 |
| C | -2.41956 | 2.81196  | -2.61497 |
| C | -1.63869 | 1.90459  | -3.32927 |
| H | -0.23047 | 0.26819  | -3.18407 |
| H | -1.60302 | 1.86328  | 0.53886  |
| H | -3.02114 | 3.51117  | -0.67511 |
| H | -1.64935 | 1.91690  | -4.41990 |
| C | -0.84558 | 0.98303  | -2.64639 |
| C | -0.82410 | 0.95806  | -1.24993 |
| C | 0.83862  | -0.97479 | 1.21462  |
| C | 0.83791  | -0.97393 | 2.62307  |
| C | 1.64056  | -1.90678 | 0.53104  |
| C | 1.60879  | -1.86971 | 3.33986  |
| H | 0.21689  | -0.25218 | 3.14116  |
| C | 2.41416  | -2.80576 | 1.24281  |
| H | 1.64331  | -1.91003 | -0.55225 |
| C | 2.40353  | -2.79336 | 2.65188  |
| H | 1.61419  | -1.87593 | 4.42340  |
| H | 3.03610  | -3.52863 | 0.71890  |
| O | 3.13578  | -3.64441 | 3.39734  |
| H | 3.65685  | -4.25060 | 2.85665  |
| O | -3.22073 | 3.74294  | -3.24698 |
| H | -3.12851 | 3.63572  | -4.20014 |

#### 4.17 $F_{NN}$ -0.0100 au OH-AB-OH Rotation TS Structure $S_0$ State

$$E_h = -723.3253$$

Cartesian Coordinates:

|   |          |          |          |
|---|----------|----------|----------|
| N | -1.33364 | -1.14256 | -0.59504 |
| N | -1.29117 | -1.17716 | 0.71622  |
| C | 1.10068  | -1.18281 | -0.76040 |
| C | 2.22722  | -1.23240 | -1.57487 |
| C | 2.10973  | -1.37230 | -2.95462 |
| C | 0.83714  | -1.44879 | -3.53266 |
| H | -1.28378 | -1.45946 | -3.18568 |
| H | 1.21507  | -1.08428 | 0.31128  |
| H | 3.21098  | -1.16794 | -1.11292 |
| H | 0.75433  | -1.57498 | -4.60954 |
| C | -0.29560 | -1.38158 | -2.74285 |
| C | -0.20726 | -1.24272 | -1.32472 |
| C | -1.25264 | 0.03770  | 1.32136  |
| C | -1.20597 | 0.02548  | 2.75034  |
| C | -1.17999 | 1.29042  | 0.64566  |
| C | -1.07210 | 1.18675  | 3.46718  |
| H | -1.26503 | -0.93217 | 3.25462  |
| C | -1.05082 | 2.45427  | 1.36683  |
| H | -1.21841 | 1.30174  | -0.43589 |
| C | -1.00405 | 2.41556  | 2.78037  |
| H | -1.02296 | 1.19230  | 4.54983  |
| H | -0.97415 | 3.41200  | 0.85742  |
| O | -0.87486 | 3.51333  | 3.52954  |
| H | -0.85752 | 4.32620  | 3.00696  |
| O | 3.21747  | -1.42503 | -3.80090 |
| H | 4.01064  | -1.47746 | -3.25427 |

#### 4.18 $F_{NN}$ -0.0100 au OH-AB-OH Rotation Inversion TS Structure $S_0$ State

$$E_h = -723.3102$$

Cartesian Coordinates:

|   |          |          |          |
|---|----------|----------|----------|
| N | 0.88044  | -0.81585 | -1.27633 |
| N | 0.88715  | -0.78565 | -0.05282 |
| C | -0.97168 | 0.90308  | -1.36078 |
| C | -1.81579 | 1.69947  | -2.12526 |
| C | -1.66274 | 1.73332  | -3.51176 |
| C | -0.67705 | 0.96311  | -4.13393 |
| H | 0.92078  | -0.46581 | -3.81770 |
| H | -1.06915 | 0.87950  | -0.28035 |
| H | -2.58689 | 2.30397  | -1.66022 |
| H | -0.56261 | 0.99755  | -5.21851 |
| C | 0.15353  | 0.15534  | -3.36338 |
| C | 0.01691  | 0.12652  | -1.97789 |
| C | 0.81387  | -0.83845 | 1.29823  |
| C | 1.61008  | 0.02640  | 2.08788  |
| C | 0.09951  | -1.87456 | 1.94304  |
| C | 1.64165  | -0.11595 | 3.46273  |
| H | 2.20661  | 0.79355  | 1.60724  |
| C | 0.07642  | -1.94554 | 3.33207  |
| H | -0.47088 | -2.58287 | 1.35289  |
| C | 0.85867  | -1.08269 | 4.10805  |
| H | 2.26497  | 0.53145  | 4.06897  |
| H | -0.53566 | -2.70413 | 3.81161  |
| O | 0.92577  | -1.11003 | 5.45610  |
| H | 0.35986  | -1.78450 | 5.85376  |
| O | -2.51998 | 2.53594  | -4.24087 |
| H | -2.19722 | 2.58611  | -5.14786 |



#### 4.19 $F_{NN}$ -0.0100 au OH-AB-OH Inversion TS Structure $S_0$ State

$$E_h = -723.3263$$

Cartesian Coordinates:

|   |          |          |          |
|---|----------|----------|----------|
| N | 1.01257  | -0.86411 | -1.27575 |
| N | 0.97998  | -0.89510 | -0.02660 |
| C | -0.42533 | 1.22178  | -1.44569 |
| C | -1.20096 | 2.06698  | -2.23575 |
| C | -1.45414 | 1.72996  | -3.56316 |
| C | -0.91179 | 0.56387  | -4.10609 |
| H | 0.32854  | -1.16787 | -3.71570 |
| H | -0.22746 | 1.48042  | -0.41137 |
| H | -1.62355 | 2.97996  | -1.82933 |
| H | -1.10579 | 0.30859  | -5.14911 |
| C | -0.12100 | -0.26334 | -3.31432 |
| C | 0.11623  | 0.04245  | -1.97215 |
| C | 0.84855  | -0.86253 | 1.30689  |
| C | 1.80979  | -1.54978 | 2.11052  |
| C | -0.23069 | -0.22834 | 1.99352  |
| C | 1.72149  | -1.58044 | 3.48071  |
| H | 2.62844  | -2.04515 | 1.60122  |
| C | -0.34878 | -0.28826 | 3.36676  |
| H | -0.99100 | 0.28622  | 1.41634  |
| C | 0.63470  | -0.95631 | 4.12698  |
| H | 2.45804  | -2.08799 | 4.09270  |
| H | -1.18857 | 0.18315  | 3.86905  |
| O | 0.60929  | -1.04913 | 5.45466  |
| H | -0.14621 | -0.60726 | 5.86833  |
| O | -2.23300 | 2.59087  | -4.32893 |
| H | -2.61725 | 2.08528  | -5.05382 |

## 4.20 $F_{NN}$ -0.0100 au OH-AB-OH Cis Structure $S_0$ State

$$E_h = -723.3578$$

Cartesian Coordinates:

|   |          |          |          |
|---|----------|----------|----------|
| N | 0.60025  | -2.22443 | -0.34117 |
| N | 0.56596  | -2.08878 | 0.89947  |
| C | 1.22779  | -0.01786 | -1.30254 |
| C | 1.18311  | 0.86682  | -2.37608 |
| C | 0.31142  | 0.63010  | -3.43551 |
| C | -0.50141 | -0.50169 | -3.43095 |
| H | -1.04432 | -2.29788 | -2.36588 |
| H | 1.89793  | 0.17628  | -0.47307 |
| H | 1.80704  | 1.75409  | -2.38566 |
| H | -1.17383 | -0.69541 | -4.26601 |
| C | -0.43823 | -1.39754 | -2.36698 |
| C | 0.40943  | -1.15682 | -1.28108 |
| C | 0.12758  | -0.91774 | 1.56749  |
| C | 0.82773  | -0.57443 | 2.73817  |
| C | -1.01513 | -0.18596 | 1.21218  |
| C | 0.44448  | 0.51653  | 3.49548  |
| H | 1.66780  | -1.18619 | 3.04711  |
| C | -1.43862 | 0.87275  | 2.00428  |
| H | -1.60492 | -0.47665 | 0.35064  |
| C | -0.70145 | 1.24216  | 3.13964  |
| H | 0.97654  | 0.79310  | 4.39820  |
| H | -2.35357 | 1.40489  | 1.75705  |
| O | -1.03876 | 2.27552  | 3.93880  |
| H | -1.93378 | 2.59653  | 3.77073  |
| O | 0.29456  | 1.53158  | -4.49988 |
| H | -0.58384 | 1.50925  | -4.89569 |

#### 4.21 $F_{NN} + 0.0025$ au OH-AB-OH Trans Structure $S_0$ State

$$E_h = -723.3811$$

Cartesian Coordinates:

|   |          |          |          |
|---|----------|----------|----------|
| N | -0.00399 | 0.00512  | -0.62249 |
| N | -0.00298 | 0.00356  | 0.63363  |
| C | -1.63359 | 1.89883  | -0.53721 |
| C | -2.41221 | 2.80341  | -1.23428 |
| C | -2.40947 | 2.80012  | -2.63714 |
| C | -1.61996 | 1.88283  | -3.33417 |
| H | -0.22030 | 0.25662  | -3.15290 |
| H | -1.62916 | 1.89375  | 0.54554  |
| H | -3.03450 | 3.52653  | -0.71870 |
| H | -1.61512 | 1.87708  | -4.42072 |
| C | -0.83924 | 0.97584  | -2.62820 |
| C | -0.83419 | 0.96999  | -1.22851 |
| C | 0.82895  | -0.96338 | 1.24242  |
| C | 0.84003  | -0.97626 | 2.64294  |
| C | 1.62411  | -1.88757 | 0.54732  |
| C | 1.62174  | -1.88476 | 3.34396  |
| H | 0.22132  | -0.25712 | 3.16901  |
| C | 2.40647  | -2.79686 | 1.24236  |
| H | 1.61742  | -1.87984 | -0.53545 |
| C | 2.40823  | -2.79890 | 2.64266  |
| H | 1.63480  | -1.89993 | 4.42816  |
| H | 3.02040  | -3.51051 | 0.69723  |
| O | 3.16364  | -3.67707 | 3.37261  |
| H | 3.66094  | -4.25571 | 2.78184  |
| O | -3.20024 | 3.71884  | -3.25613 |
| H | -3.13268 | 3.64027  | -4.21608 |

## 4.22 $F_{NN} + 0.0025$ au OH-AB-OH Rotation TS Structure $S_0$ State

$$E_h = -723.3093$$

Cartesian Coordinates:

|   |          |          |          |
|---|----------|----------|----------|
| N | -1.28203 | -1.25058 | -0.53763 |
| N | -1.28212 | -1.24978 | 0.76998  |
| C | 1.15857  | -1.28687 | -0.61697 |
| C | 2.30107  | -1.24908 | -1.39263 |
| C | 2.20846  | -1.30924 | -2.78840 |
| C | 0.94809  | -1.39436 | -3.41179 |
| H | -1.17497 | -1.46886 | -3.11544 |
| H | 1.22033  | -1.23148 | 0.46224  |
| H | 3.28337  | -1.16198 | -0.94142 |
| H | 0.88126  | -1.43610 | -4.49580 |
| C | -0.19771 | -1.41319 | -2.64983 |
| C | -0.12823 | -1.34668 | -1.22879 |
| C | -1.28775 | -0.01330 | 1.34565  |
| C | -1.28811 | 0.04653  | 2.76790  |
| C | -1.15636 | 1.20562  | 0.62821  |
| C | -1.16105 | 1.24516  | 3.43273  |
| H | -1.37922 | -0.88535 | 3.31518  |
| C | -1.02679 | 2.40825  | 1.30845  |
| H | -1.13479 | 1.18595  | -0.45288 |
| C | -1.03177 | 2.43922  | 2.70415  |
| H | -1.14969 | 1.28930  | 4.51644  |
| H | -0.90233 | 3.33099  | 0.74575  |
| O | -0.88271 | 3.59664  | 3.42012  |
| H | -0.81457 | 4.34944  | 2.82005  |
| O | 3.36900  | -1.25331 | -3.49070 |
| H | 3.20332  | -1.29282 | -4.44131 |

### 4.23 $F_{NN} + 0.0025$ au OH-AB-OH Rotation Inversion TS Structure $S_0$ State

$$E_h = -723.3122$$

Cartesian Coordinates:

|   |          |          |          |
|---|----------|----------|----------|
| N | 0.98879  | -0.74602 | -1.29338 |
| N | 0.98695  | -0.74623 | -0.06915 |
| C | -0.83973 | 0.97768  | -1.32018 |
| C | -1.69313 | 1.77000  | -2.06392 |
| C | -1.64974 | 1.71974  | -3.46673 |
| C | -0.74570 | 0.87285  | -4.11529 |
| H | 0.82040  | -0.58486 | -3.84088 |
| H | -0.86504 | 1.01127  | -0.23625 |
| H | -2.40348 | 2.43802  | -1.59009 |
| H | -0.71222 | 0.83522  | -5.20052 |
| C | 0.11039  | 0.08029  | -3.36159 |
| C | 0.06809  | 0.12612  | -1.96714 |
| C | 0.91281  | -0.83744 | 1.25786  |
| C | 1.62317  | 0.05986  | 2.10008  |
| C | 0.13497  | -1.85196 | 1.87328  |
| C | 1.56247  | -0.07240 | 3.47998  |
| H | 2.22902  | 0.83943  | 1.65328  |
| C | 0.07633  | -1.94289 | 3.26009  |
| H | -0.41324 | -2.55302 | 1.25540  |
| C | 0.78863  | -1.06648 | 4.07435  |
| H | 2.12123  | 0.61063  | 4.11149  |
| H | -0.53615 | -2.72641 | 3.70268  |
| O | 0.76014  | -1.13097 | 5.46090  |
| H | 0.25588  | -1.90665 | 5.73082  |
| O | -2.51646 | 2.52431  | -4.13210 |
| H | -2.41781 | 2.42917  | -5.08808 |

4.24  $F_{NN}$  +0.0025 au OH-AB-OH Inversion TS Structure  $S_0$   
State

$E_h = -723.3036$

Cartesian Coordinates:

|   |          |          |          |
|---|----------|----------|----------|
| N | 0.94606  | -0.92771 | -1.28656 |
| N | 0.95815  | -0.91631 | -0.04031 |
| C | -0.48802 | 1.14976  | -1.41309 |
| C | -1.27327 | 1.99218  | -2.18170 |
| C | -1.49834 | 1.69457  | -3.53253 |
| C | -0.91321 | 0.56278  | -4.10775 |
| H | 0.36854  | -1.13766 | -3.76330 |
| H | -0.29143 | 1.39211  | -0.37520 |
| H | -1.71519 | 2.89171  | -1.76698 |
| H | -1.07756 | 0.33668  | -5.15808 |
| C | -0.10987 | -0.26445 | -3.33260 |
| C | 0.09076  | 0.00323  | -1.97576 |
| C | 0.87851  | -0.83207 | 1.30093  |
| C | 1.81436  | -1.54571 | 2.09981  |
| C | -0.19193 | -0.19728 | 1.98424  |
| C | 1.73063  | -1.56593 | 3.47985  |
| H | 2.61070  | -2.07306 | 1.58750  |
| C | -0.31044 | -0.26545 | 3.36583  |
| H | -0.94856 | 0.32159  | 1.40858  |
| C | 0.66039  | -0.93059 | 4.11804  |
| H | 2.45919  | -2.10058 | 4.07962  |
| H | -1.15291 | 0.21173  | 3.86291  |
| O | 0.60651  | -1.00254 | 5.48463  |
| H | -0.17966 | -0.54449 | 5.80543  |
| O | -2.28913 | 2.55610  | -4.22994 |
| H | -2.36219 | 2.28532  | -5.15371 |

#### 4.25 $F_{NN} + 0.0025$ au OH-AB-OH Cis Structure $S_0$ State

$$E_h = -723.3536$$

Cartesian Coordinates:

|   |          |          |          |
|---|----------|----------|----------|
| N | 0.46968  | -2.27292 | -0.36239 |
| N | 0.45789  | -2.12931 | 0.87750  |
| C | 1.01081  | 0.03156  | -1.19106 |
| C | 0.95349  | 0.95389  | -2.22299 |
| C | 0.21842  | 0.66992  | -3.37986 |
| C | -0.42336 | -0.56468 | -3.51049 |
| H | -0.77848 | -2.48270 | -2.60077 |
| H | 1.59130  | 0.26061  | -0.30585 |
| H | 1.47917  | 1.89987  | -2.15821 |
| H | -0.97146 | -0.80408 | -4.41780 |
| C | -0.32535 | -1.50356 | -2.49043 |
| C | 0.34964  | -1.20245 | -1.30275 |
| C | 0.11024  | -0.91191 | 1.55103  |
| C | 0.83567  | -0.60704 | 2.70916  |
| C | -1.02566 | -0.15308 | 1.24509  |
| C | 0.49289  | 0.48082  | 3.50097  |
| H | 1.68230  | -1.23257 | 2.97181  |
| C | -1.39643 | 0.91260  | 2.05721  |
| H | -1.62760 | -0.39823 | 0.37859  |
| C | -0.62803 | 1.24522  | 3.17537  |
| H | 1.07068  | 0.73844  | 4.38170  |
| H | -2.28686 | 1.48824  | 1.81542  |
| O | -0.94086 | 2.29625  | 3.99900  |
| H | -1.69794 | 2.77818  | 3.64505  |
| O | 0.18643  | 1.63085  | -4.34331 |
| H | -0.29281 | 1.32431  | -5.12324 |

## 4.26 $F_{NN} + 0.0050$ au OH-AB-OH Trans Structure $S_0$ State

$$E_h = -723.3860$$

Cartesian Coordinates:

|   |          |          |          |
|---|----------|----------|----------|
| N | -0.00671 | 0.00830  | -0.61908 |
| N | -0.00605 | 0.00715  | 0.63806  |
| C | -1.63599 | 1.90163  | -0.53582 |
| C | -2.41227 | 2.80348  | -1.23681 |
| C | -2.40756 | 2.79788  | -2.64167 |
| C | -1.61633 | 1.87860  | -3.33570 |
| H | -0.21842 | 0.25445  | -3.14851 |
| H | -1.63379 | 1.89914  | 0.54704  |
| H | -3.03639 | 3.52872  | -0.72624 |
| H | -1.60890 | 1.86983  | -4.42186 |
| C | -0.83796 | 0.97435  | -2.62565 |
| C | -0.83510 | 0.97105  | -1.22442 |
| C | 0.82619  | -0.96015 | 1.24774  |
| C | 0.84027  | -0.97652 | 2.64753  |
| C | 1.62069  | -1.88357 | 0.55028  |
| C | 1.62422  | -1.88764 | 3.34540  |
| H | 0.22216  | -0.25808 | 3.17578  |
| C | 2.40463  | -2.79470 | 1.24184  |
| H | 1.61206  | -1.87358 | -0.53246 |
| C | 2.40896  | -2.79975 | 2.64109  |
| H | 1.63902  | -1.90486 | 4.43002  |
| H | 3.01688  | -3.50639 | 0.69227  |
| O | 3.16912  | -3.68345 | 3.36772  |
| H | 3.66180  | -4.25680 | 2.76783  |
| O | -3.19619 | 3.71410  | -3.25764 |
| H | -3.13393 | 3.64170  | -4.21905 |



#### 4.27 $F_{NN} + 0.0050$ au OH-AB-OH Rotation TS Structure $S_0$ State

$$E_h = -723.3153$$

Cartesian Coordinates:

|   |          |          |          |
|---|----------|----------|----------|
| N | -1.27302 | -1.24952 | -0.53773 |
| N | -1.27296 | -1.25008 | 0.77218  |
| C | 1.16891  | -1.30378 | -0.61826 |
| C | 2.30672  | -1.27137 | -1.39578 |
| C | 2.20782  | -1.31913 | -2.79549 |
| C | 0.94415  | -1.38462 | -3.41758 |
| H | -1.17698 | -1.43888 | -3.11235 |
| H | 1.23089  | -1.25861 | 0.46156  |
| H | 3.29315  | -1.19680 | -0.95144 |
| H | 0.87419  | -1.41511 | -4.50133 |
| C | -0.19711 | -1.39837 | -2.65088 |
| C | -0.12087 | -1.34518 | -1.22819 |
| C | -1.27808 | -0.01529 | 1.34862  |
| C | -1.27828 | 0.04922  | 2.77112  |
| C | -1.15288 | 1.20604  | 0.63289  |
| C | -1.16267 | 1.25141  | 3.43484  |
| H | -1.36397 | -0.88225 | 3.32061  |
| C | -1.03463 | 2.41127  | 1.31348  |
| H | -1.12892 | 1.18993  | -0.44819 |
| C | -1.04235 | 2.44551  | 2.70725  |
| H | -1.15448 | 1.29486  | 4.51923  |
| H | -0.91913 | 3.33309  | 0.74716  |
| O | -0.90403 | 3.61210  | 3.42366  |
| H | -0.84558 | 4.35866  | 2.81498  |
| O | 3.36402  | -1.27130 | -3.49164 |
| H | 3.20940  | -1.29766 | -4.44548 |

## 4.28 $F_{NN} + 0.0050$ au OH-AB-OH Rotation Inversion TS Structure $S_0$ State

$$E_h = -723.3192$$

Cartesian Coordinates:

|   |          |          |          |
|---|----------|----------|----------|
| N | 0.98343  | -0.73837 | -1.28934 |
| N | 0.97883  | -0.73671 | -0.06323 |
| C | -0.83694 | 0.98851  | -1.32135 |
| C | -1.68594 | 1.77750  | -2.07093 |
| C | -1.64494 | 1.71672  | -3.47569 |
| C | -0.74419 | 0.86085  | -4.11897 |
| H | 0.81554  | -0.59804 | -3.83612 |
| H | -0.86212 | 1.03182  | -0.23773 |
| H | -2.39317 | 2.45351  | -1.60381 |
| H | -0.71141 | 0.81398  | -5.20346 |
| C | 0.10888  | 0.07238  | -3.35964 |
| C | 0.06810  | 0.12779  | -1.96318 |
| C | 0.90216  | -0.82551 | 1.25733  |
| C | 1.60943  | 0.07294  | 2.10630  |
| C | 0.12206  | -1.84152 | 1.87613  |
| C | 1.55525  | -0.06790 | 3.48603  |
| H | 2.21314  | 0.85495  | 1.66098  |
| C | 0.06954  | -1.93776 | 3.26159  |
| H | -0.42838 | -2.53978 | 1.25719  |
| C | 0.78731  | -1.06716 | 4.07756  |
| H | 2.11725  | 0.61315  | 4.11755  |
| H | -0.54373 | -2.72195 | 3.70327  |
| O | 0.75885  | -1.14759 | 5.47126  |
| H | 0.33470  | -1.97668 | 5.71880  |
| O | -2.50804 | 2.51890  | -4.13893 |
| H | -2.41907 | 2.42523  | -5.09672 |

## 4.29 $F_{NN}$ +0.0050 au OH-AB-OH Inversion TS Structure $S_0$

### State

$$E_h = -723.3063$$

Cartesian Coordinates:

|   |          |          |          |
|---|----------|----------|----------|
| N | 0.92362  | -0.94097 | -1.28710 |
| N | 0.94995  | -0.91664 | -0.03973 |
| C | -0.50017 | 1.14041  | -1.40941 |
| C | -1.28116 | 1.98287  | -2.17911 |
| C | -1.49778 | 1.69135  | -3.53531 |
| C | -0.90719 | 0.56222  | -4.11239 |
| H | 0.37142  | -1.13749 | -3.76767 |
| H | -0.30730 | 1.38150  | -0.37061 |
| H | -1.72617 | 2.88168  | -1.76625 |
| H | -1.06215 | 0.34168  | -5.16479 |
| C | -0.10955 | -0.26692 | -3.33517 |
| C | 0.08201  | -0.00540 | -1.97380 |
| C | 0.88707  | -0.81694 | 1.29899  |
| C | 1.81791  | -1.53936 | 2.09831  |
| C | -0.18413 | -0.18625 | 1.98696  |
| C | 1.73496  | -1.56322 | 3.47931  |
| H | 2.60967  | -2.07200 | 1.58423  |
| C | -0.30231 | -0.26222 | 3.36958  |
| H | -0.94214 | 0.33357  | 1.41428  |
| C | 0.66653  | -0.92901 | 4.11907  |
| H | 2.46107  | -2.10752 | 4.07414  |
| H | -1.14666 | 0.21244  | 3.86753  |
| O | 0.60489  | -1.00362 | 5.49381  |
| H | -0.18868 | -0.54714 | 5.79727  |
| O | -2.28295 | 2.55510  | -4.22559 |
| H | -2.34865 | 2.30583  | -5.15666 |

### 4.30 $F_{NN} + 0.0050$ au OH-AB-OH Cis Structure $S_0$ State

$$E_h = -723.3584$$

Cartesian Coordinates:

|   |          |          |          |
|---|----------|----------|----------|
| N | 0.43617  | -2.27435 | -0.36801 |
| N | 0.42990  | -2.12925 | 0.87378  |
| C | 0.96175  | 0.04531  | -1.17832 |
| C | 0.90781  | 0.96509  | -2.21070 |
| C | 0.20981  | 0.66461  | -3.38889 |
| C | -0.39490 | -0.58786 | -3.53805 |
| H | -0.72016 | -2.51453 | -2.64016 |
| H | 1.52076  | 0.28729  | -0.28301 |
| H | 1.41266  | 1.92164  | -2.13701 |
| H | -0.90823 | -0.84209 | -4.46101 |
| C | -0.29870 | -1.52313 | -2.51605 |
| C | 0.33287  | -1.20567 | -1.30648 |
| C | 0.10501  | -0.90457 | 1.54750  |
| C | 0.83742  | -0.60997 | 2.70360  |
| C | -1.03168 | -0.13938 | 1.25775  |
| C | 0.50245  | 0.47242  | 3.50842  |
| H | 1.68672  | -1.23786 | 2.95257  |
| C | -1.39293 | 0.92118  | 2.08093  |
| H | -1.63839 | -0.37323 | 0.39149  |
| C | -0.61699 | 1.24227  | 3.19652  |
| H | 1.09155  | 0.72380  | 4.38399  |
| H | -2.28121 | 1.50348  | 1.84667  |
| O | -0.92701 | 2.29155  | 4.03197  |
| H | -1.64291 | 2.80998  | 3.64554  |
| O | 0.18120  | 1.62617  | -4.34363 |
| H | -0.24922 | 1.31529  | -5.15068 |

### 4.31 $F_{NN} + 0.0075$ au OH-AB-OH Trans Structure $S_0$ State

$$E_h = -723.3924$$

Cartesian Coordinates:

|   |          |          |          |
|---|----------|----------|----------|
| N | -0.00961 | 0.01170  | -0.61546 |
| N | -0.00932 | 0.01096  | 0.64329  |
| C | -1.63853 | 1.90458  | -0.53429 |
| C | -2.41236 | 2.80356  | -1.23952 |
| C | -2.40537 | 2.79532  | -2.64653 |
| C | -1.61238 | 1.87401  | -3.33754 |
| H | -0.21633 | 0.25206  | -3.14409 |
| H | -1.63867 | 1.90480  | 0.54869  |
| H | -3.03832 | 3.53092  | -0.73406 |
| H | -1.60232 | 1.86219  | -4.42335 |
| C | -0.83649 | 0.97266  | -2.62312 |
| C | -0.83592 | 0.97202  | -1.21997 |
| C | 0.82286  | -0.95625 | 1.25362  |
| C | 0.84054  | -0.97680 | 2.65299  |
| C | 1.61680  | -1.87904 | 0.55352  |
| C | 1.62691  | -1.89076 | 3.34714  |
| H | 0.22317  | -0.25919 | 3.18390  |
| C | 2.40238  | -2.79209 | 1.24104  |
| H | 1.60608  | -1.86661 | -0.52926 |
| C | 2.40988  | -2.80083 | 2.63941  |
| H | 1.64384  | -1.91045 | 4.43237  |
| H | 3.01276  | -3.50163 | 0.68649  |
| O | 3.17494  | -3.69025 | 3.36193  |
| H | 3.66272  | -4.25792 | 2.75253  |
| O | -3.19189 | 3.70908  | -3.25954 |
| H | -3.13496 | 3.64287  | -4.22248 |

### 4.32 $F_{NN} + 0.0075$ au OH-AB-OH Rotation TS Structure $S_0$ State

$$E_h = -723.3236$$

Cartesian Coordinates:

|   |          |          |          |
|---|----------|----------|----------|
| N | -1.26025 | -1.24186 | -0.53979 |
| N | -1.25979 | -1.24579 | 0.77342  |
| C | 1.18326  | -1.31831 | -0.62312 |
| C | 2.31545  | -1.29871 | -1.40367 |
| C | 2.20889  | -1.33648 | -2.80763 |
| C | 0.94147  | -1.37671 | -3.42714 |
| H | -1.17712 | -1.40139 | -3.11068 |
| H | 1.24684  | -1.28298 | 0.45712  |
| H | 3.30656  | -1.24249 | -0.96722 |
| H | 0.86741  | -1.39841 | -4.51050 |
| C | -0.19435 | -1.37866 | -2.65428 |
| C | -0.11048 | -1.33673 | -1.22960 |
| C | -1.26350 | -0.01420 | 1.35221  |
| C | -1.26323 | 0.05284  | 2.77558  |
| C | -1.14878 | 1.21207  | 0.64078  |
| C | -1.16518 | 1.25789  | 3.44057  |
| H | -1.34051 | -0.87946 | 3.32579  |
| C | -1.04765 | 2.41848  | 1.32394  |
| H | -1.12297 | 1.20190  | -0.44037 |
| C | -1.05934 | 2.45382  | 2.71643  |
| H | -1.16150 | 1.29865  | 4.52596  |
| H | -0.94528 | 3.34092  | 0.75574  |
| O | -0.93896 | 3.62943  | 3.43486  |
| H | -0.89523 | 4.37064  | 2.81857  |
| O | 3.36047  | -1.30598 | -3.49840 |
| H | 3.21706  | -1.32430 | -4.45530 |

### 4.33 $F_{NN} + 0.0075$ au OH-AB-OH Rotation Inversion TS Structure $S_0$ State

$$E_h = -723.3284$$

Cartesian Coordinates:

|   |          |          |          |
|---|----------|----------|----------|
| N | 0.96890  | -0.73205 | -1.28145 |
| N | 0.95981  | -0.72575 | -0.05304 |
| C | -0.84215 | 1.00003  | -1.32628 |
| C | -1.68209 | 1.78613  | -2.08610 |
| C | -1.63612 | 1.71524  | -3.49293 |
| C | -0.73599 | 0.84978  | -4.12645 |
| H | 0.81417  | -0.61173 | -3.82698 |
| H | -0.87278 | 1.05313  | -0.24315 |
| H | -2.38823 | 2.47037  | -1.62941 |
| H | -0.69817 | 0.79405  | -5.21009 |
| C | 0.10898  | 0.06466  | -3.35705 |
| C | 0.06307  | 0.12940  | -1.95831 |
| C | 0.87848  | -0.80898 | 1.26122  |
| C | 1.58452  | 0.09036  | 2.11628  |
| C | 0.09576  | -1.82620 | 1.88504  |
| C | 1.54424  | -0.06380 | 3.49551  |
| H | 2.18445  | 0.87567  | 1.67169  |
| C | 0.05530  | -1.93111 | 3.26871  |
| H | -0.46016 | -2.51961 | 1.26556  |
| C | 0.78542  | -1.07025 | 4.08531  |
| H | 2.11403  | 0.61223  | 4.12635  |
| H | -0.55867 | -2.71482 | 3.71122  |
| O | 0.76611  | -1.17461 | 5.48655  |
| H | 0.49617  | -2.07253 | 5.70856  |
| O | -2.49124 | 2.51582  | -4.15829 |
| H | -2.40721 | 2.42385  | -5.11756 |

4.34  $F_{NN} +0.0075$  au OH-AB-OH Inversion TS Structure  $S_0$   
State

$$E_h = -723.3115$$

Cartesian Coordinates:

|   |          |          |          |
|---|----------|----------|----------|
| N | 0.89937  | -0.95259 | -1.28726 |
| N | 0.94075  | -0.91519 | -0.03820 |
| C | -0.51376 | 1.13250  | -1.40645 |
| C | -1.28867 | 1.97492  | -2.17869 |
| C | -1.49564 | 1.68870  | -3.54044 |
| C | -0.90152 | 0.56028  | -4.11792 |
| H | 0.37037  | -1.14042 | -3.77022 |
| H | -0.32636 | 1.37275  | -0.36645 |
| H | -1.73624 | 2.87363  | -1.76841 |
| H | -1.04729 | 0.34383  | -5.17211 |
| C | -0.11199 | -0.27108 | -3.33721 |
| C | 0.07102  | -0.01459 | -1.97084 |
| C | 0.89540  | -0.80022 | 1.29659  |
| C | 1.82276  | -1.53052 | 2.09700  |
| C | -0.17558 | -0.17268 | 1.99167  |
| C | 1.74120  | -1.55914 | 3.47868  |
| H | 2.60959  | -2.06832 | 1.58046  |
| C | -0.29216 | -0.25662 | 3.37524  |
| H | -0.93580 | 0.34786  | 1.42274  |
| C | 0.67437  | -0.92672 | 4.12169  |
| H | 2.46430  | -2.11412 | 4.06816  |
| H | -1.13709 | 0.21673  | 3.87526  |
| O | 0.60641  | -1.00507 | 5.50410  |
| H | -0.20502 | -0.57003 | 5.79056  |
| O | -2.27376 | 2.55485  | -4.22530 |
| H | -2.33256 | 2.32521  | -5.16277 |



### 4.35 $F_{NN} + 0.0075$ au OH-AB-OH Cis Structure $S_0$ State

$$E_h = -723.3651$$

Cartesian Coordinates:

|   |          |          |          |
|---|----------|----------|----------|
| N | 0.40041  | -2.27201 | -0.37460 |
| N | 0.40033  | -2.12574 | 0.87004  |
| C | 0.91019  | 0.06180  | -1.16953 |
| C | 0.86189  | 0.97583  | -2.20505 |
| C | 0.20436  | 0.65650  | -3.40459 |
| C | -0.36315 | -0.61294 | -3.56840 |
| H | -0.66219 | -2.54361 | -2.67557 |
| H | 1.44643  | 0.31895  | -0.26480 |
| H | 1.34567  | 1.94265  | -2.12478 |
| H | -0.83933 | -0.88354 | -4.50613 |
| C | -0.27196 | -1.54096 | -2.54119 |
| C | 0.31368  | -1.20598 | -1.31017 |
| C | 0.09923  | -0.89519 | 1.54383  |
| C | 0.83960  | -0.61182 | 2.69793  |
| C | -1.03873 | -0.12307 | 1.27276  |
| C | 0.51227  | 0.46288  | 3.51830  |
| H | 1.69200  | -1.24186 | 2.93140  |
| C | -1.39076 | 0.92982  | 2.10972  |
| H | -1.65101 | -0.34438 | 0.40712  |
| C | -0.60695 | 1.23735  | 3.22315  |
| H | 1.11332  | 0.70685  | 4.38851  |
| H | -2.27776 | 1.51820  | 1.88544  |
| O | -0.91460 | 2.28296  | 4.07311  |
| H | -1.58649 | 2.83747  | 3.65880  |
| O | 0.18254  | 1.61524  | -4.35388 |
| H | -0.20526 | 1.30284  | -5.18267 |

### 4.36 $F_{NN} + 0.0100$ au OH-AB-OH Trans Structure $S_0$ State

$$E_h = -723.4005$$

Cartesian Coordinates:

|   |          |          |          |
|---|----------|----------|----------|
| N | -0.01266 | 0.01525  | -0.61183 |
| N | -0.01270 | 0.01491  | 0.64923  |
| C | -1.64117 | 1.90763  | -0.53265 |
| C | -2.41238 | 2.80357  | -1.24223 |
| C | -2.40308 | 2.79265  | -2.65170 |
| C | -1.60823 | 1.86918  | -3.33963 |
| H | -0.21412 | 0.24951  | -3.13970 |
| H | -1.64375 | 1.91068  | 0.55047  |
| H | -3.04021 | 3.53309  | -0.74199 |
| H | -1.59553 | 1.85431  | -4.42519 |
| C | -0.83494 | 0.97087  | -2.62068 |
| C | -0.83655 | 0.97275  | -1.21522 |
| C | 0.81903  | -0.95177 | 1.25987  |
| C | 0.84081  | -0.97708 | 2.65912  |
| C | 1.61255  | -1.87410 | 0.55686  |
| C | 1.62979  | -1.89410 | 3.34915  |
| H | 0.22433  | -0.26050 | 3.19322  |
| C | 2.39984  | -2.78915 | 1.23993  |
| H | 1.59957  | -1.85905 | -0.52598 |
| C | 2.41085  | -2.80197 | 2.63761  |
| H | 1.64913  | -1.91659 | 4.43510  |
| H | 3.00821  | -3.49635 | 0.68001  |
| O | 3.18102  | -3.69735 | 3.35556  |
| H | 3.66377  | -4.25917 | 2.73657  |
| O | -3.18736 | 3.70380  | -3.26185 |
| H | -3.13581 | 3.64386  | -4.22637 |

### 4.37 $F_{NN} + 0.0100$ au OH-AB-OH Rotation TS Structure $S_0$ State

$$E_h = -723.3345$$

Cartesian Coordinates:

|   |          |          |          |
|---|----------|----------|----------|
| N | -1.24354 | -1.22741 | -0.54371 |
| N | -1.24246 | -1.23666 | 0.77379  |
| C | 1.20162  | -1.33041 | -0.63152 |
| C | 2.32697  | -1.33133 | -1.41633 |
| C | 2.21153  | -1.36161 | -2.82489 |
| C | 0.94015  | -1.37084 | -3.44040 |
| H | -1.17488 | -1.35632 | -3.11045 |
| H | 1.26824  | -1.30442 | 0.44898  |
| H | 3.32300  | -1.29960 | -0.98879 |
| H | 0.86100  | -1.38627 | -4.52332 |
| C | -0.18909 | -1.35419 | -2.65998 |
| C | -0.09681 | -1.32129 | -1.23292 |
| C | -1.24376 | -0.00968 | 1.35646  |
| C | -1.24271 | 0.05772  | 2.78137  |
| C | -1.14338 | 1.22382  | 0.65190  |
| C | -1.16872 | 1.26478  | 3.44999  |
| H | -1.30903 | -0.87648 | 3.33085  |
| C | -1.06502 | 2.42978  | 1.33976  |
| H | -1.11607 | 1.22191  | -0.42935 |
| C | -1.08251 | 2.46397  | 2.73164  |
| H | -1.17131 | 1.30085  | 4.53666  |
| H | -0.97932 | 3.35409  | 0.77135  |
| O | -0.98743 | 3.64809  | 3.45362  |
| H | -0.96620 | 4.38479  | 2.83079  |
| O | 3.35774  | -1.35790 | -3.51120 |
| H | 3.22528  | -1.37125 | -4.47106 |

### 4.38 $F_{NN} + 0.0100$ au OH-AB-OH Rotation Inversion TS Structure $S_0$ State

$$E_h = -723.3403$$

Cartesian Coordinates:

|   |          |          |          |
|---|----------|----------|----------|
| N | 0.91882  | -0.73756 | -1.25724 |
| N | 0.89443  | -0.72047 | -0.02644 |
| C | -0.87612 | 1.00711  | -1.34201 |
| C | -1.68610 | 1.79685  | -2.12686 |
| C | -1.60306 | 1.72376  | -3.53531 |
| C | -0.69309 | 0.84829  | -4.14351 |
| H | 0.83191  | -0.62501 | -3.79982 |
| H | -0.93772 | 1.06421  | -0.26030 |
| H | -2.39990 | 2.48817  | -1.69341 |
| H | -0.62554 | 0.78971  | -5.22543 |
| C | 0.12093  | 0.05838  | -3.34926 |
| C | 0.03979  | 0.12594  | -1.94849 |
| C | 0.79604  | -0.79072 | 1.27958  |
| C | 1.50665  | 0.10814  | 2.13986  |
| C | -0.00365 | -1.80050 | 1.91006  |
| C | 1.49298  | -0.07267 | 3.51569  |
| H | 2.09719  | 0.90048  | 1.69518  |
| C | -0.01476 | -1.92856 | 3.28938  |
| H | -0.58192 | -2.47423 | 1.28902  |
| C | 0.74958  | -1.09256 | 4.10508  |
| H | 2.07653  | 0.59251  | 4.14701  |
| H | -0.62575 | -2.70852 | 3.73935  |
| O | 0.77394  | -1.26527 | 5.51326  |
| H | 1.16007  | -2.13063 | 5.69258  |
| O | -2.43083 | 2.52984  | -4.21674 |
| H | -2.33385 | 2.44258  | -5.17632 |

### 4.39 $F_{NN}$ +0.0100 au OH-AB-OH Inversion TS Structure $S_0$

#### State

$$E_h = -723.3195$$

Cartesian Coordinates:

|   |          |          |          |
|---|----------|----------|----------|
| N | 0.87232  | -0.96279 | -1.28595 |
| N | 0.93008  | -0.91147 | -0.03499 |
| C | -0.52892 | 1.12708  | -1.40453 |
| C | -1.29543 | 1.96927  | -2.18154 |
| C | -1.49188 | 1.68680  | -3.54917 |
| C | -0.89589 | 0.55670  | -4.12466 |
| H | 0.36536  | -1.14666 | -3.76975 |
| H | -0.34805 | 1.36761  | -0.36341 |
| H | -1.74508 | 2.86904  | -1.77591 |
| H | -1.03189 | 0.34313  | -5.18053 |
| C | -0.11723 | -0.27688 | -3.33818 |
| C | 0.05684  | -0.02377 | -1.96643 |
| C | 0.90349  | -0.78060 | 1.29453  |
| C | 1.82899  | -1.51854 | 2.09581  |
| C | -0.16756 | -0.15732 | 1.99935  |
| C | 1.74931  | -1.55469 | 3.47781  |
| H | 2.61122  | -2.06016 | 1.57594  |
| C | -0.28045 | -0.25042 | 3.38381  |
| H | -0.93131 | 0.36381  | 1.43586  |
| C | 0.68421  | -0.92513 | 4.12592  |
| H | 2.46962  | -2.12204 | 4.06000  |
| H | -1.12558 | 0.22110  | 3.88734  |
| O | 0.60960  | -1.01030 | 5.51672  |
| H | -0.22417 | -0.60766 | 5.78536  |
| O | -2.25936 | 2.55609  | -4.23063 |
| H | -2.31613 | 2.34172  | -5.17289 |

#### 4.40 $F_{NN} + 0.0100$ au OH-AB-OH Cis Structure $S_0$ State

$$E_h = -723.3738$$

Cartesian Coordinates:

|   |          |          |          |
|---|----------|----------|----------|
| N | 0.36471  | -2.26622 | -0.38190 |
| N | 0.37128  | -2.11882 | 0.86640  |
| C | 0.85747  | 0.08030  | -1.16478 |
| C | 0.81675  | 0.98600  | -2.20556 |
| C | 0.20212  | 0.64616  | -3.42576 |
| C | -0.32931 | -0.63913 | -3.60008 |
| H | -0.60665 | -2.56958 | -2.70650 |
| H | 1.36999  | 0.35423  | -0.25147 |
| H | 1.27970  | 1.96259  | -2.12115 |
| H | -0.76729 | -0.92686 | -4.55099 |
| C | -0.24611 | -1.55694 | -2.56515 |
| C | 0.29265  | -1.20373 | -1.31406 |
| C | 0.09296  | -0.88409 | 1.53992  |
| C | 0.84217  | -0.61206 | 2.69198  |
| C | -1.04669 | -0.10478 | 1.28938  |
| C | 0.52168  | 0.45256  | 3.53017  |
| H | 1.69835  | -1.24355 | 2.90819  |
| C | -1.39044 | 0.93762  | 2.14275  |
| H | -1.66481 | -0.31240 | 0.42446  |
| C | -0.59889 | 1.23009  | 3.25454  |
| H | 1.13515  | 0.68852  | 4.39474  |
| H | -2.27711 | 1.53118  | 1.93046  |
| O | -0.90541 | 2.27021  | 4.12140  |
| H | -1.52953 | 2.86079  | 3.68291  |
| O | 0.19059  | 1.59908  | -4.37222 |
| H | -0.15959 | 1.28707  | -5.21891 |

## 5 Cartesian coordinates and energies of protonated OH–AB–O structures in $F_{OC}$ conditions

### 5.1 $F_{OC}$ -0.0025 au OH–AB–OH Trans Structure $S_0$ State

$$E_h = -723.3792$$

Cartesian Coordinates:

|   |          |          |          |
|---|----------|----------|----------|
| O | 0.40457  | -0.47019 | -5.86933 |
| C | 0.40615  | -0.47206 | -4.49682 |
| C | 1.13248  | -1.31596 | -2.36080 |
| C | 0.32825  | -0.38154 | -1.70230 |
| C | -0.44182 | 0.51317  | -2.46644 |
| C | -0.40325 | 0.46834  | -3.84990 |
| C | 1.17468  | -1.36498 | -3.75058 |
| H | 1.72325  | -2.00238 | -1.76427 |
| H | -1.06435 | 1.23648  | -1.95447 |
| H | -0.99279 | 1.15332  | -4.45000 |
| H | 1.80495  | -2.09726 | -4.25048 |
| N | 0.36288  | -0.42178 | -0.28965 |
| N | -0.36267 | 0.42152  | 0.29429  |
| C | -0.32906 | 0.38243  | 1.70218  |
| C | -1.13706 | 1.32179  | 2.36009  |
| C | 0.43989  | -0.51155 | 2.46601  |
| C | -1.18513 | 1.37770  | 3.74364  |
| H | -1.72615 | 2.00665  | 1.76004  |
| C | 0.39606  | -0.46058 | 3.84907  |
| H | 1.06457  | -1.23784 | 1.96161  |
| C | -0.41671 | 0.48439  | 4.49497  |
| H | -1.80601 | 2.09954  | 4.26110  |
| H | 0.99204  | -1.15351 | 4.43775  |
| O | -0.49941 | 0.58057  | 5.84666  |
| H | 0.06318  | -0.07351 | 6.28000  |
| H | 0.99680  | -1.15822 | -6.19532 |

## 5.2 $F_{OC}$ -0.0025 au OH-AB-OH Rotation TS Structure $S_0$ State

$$E_h = -723.3047$$

Cartesian Coordinates:

|   |          |          |          |
|---|----------|----------|----------|
| O | 1.30080  | -1.42534 | -4.66810 |
| C | 1.27858  | -1.41403 | -3.29359 |
| C | 1.13151  | -2.54068 | -1.16238 |
| C | 1.18063  | -1.29181 | -0.48141 |
| C | 1.30017  | -0.10773 | -1.26524 |
| C | 1.33053  | -0.17872 | -2.64972 |
| C | 1.17958  | -2.59541 | -2.53900 |
| H | 1.05199  | -3.44651 | -0.57206 |
| H | 1.33496  | 0.85123  | -0.76466 |
| H | 1.39128  | 0.72357  | -3.24914 |
| H | 1.13609  | -3.55918 | -3.04237 |
| N | 1.03256  | -1.27961 | 0.85954  |
| N | 1.15886  | -0.17099 | 1.53531  |
| C | -0.01018 | 0.48531  | 1.79049  |
| C | 0.08374  | 1.70033  | 2.52594  |
| C | -1.27650 | 0.10511  | 1.27165  |
| C | -1.01713 | 2.50023  | 2.72061  |
| H | 1.05264  | 1.98053  | 2.92336  |
| C | -2.38018 | 0.91549  | 1.47147  |
| H | -1.36102 | -0.81365 | 0.70695  |
| C | -2.26175 | 2.10878  | 2.19649  |
| H | -0.95224 | 3.42852  | 3.27630  |
| H | -3.34315 | 0.63201  | 1.05285  |
| O | -3.30840 | 2.94891  | 2.40130  |
| H | -4.12989 | 2.56057  | 2.07501  |
| H | 1.26827  | -2.33569 | -4.98501 |



### 5.3 $F_{OC}$ -0.0025 au OH–AB–OH Rotation Inversion TS Structure

#### $S_0$ State

$$E_h = -723.3050$$

Cartesian Coordinates:

|   |          |          |          |
|---|----------|----------|----------|
| O | 1.22553  | -1.41680 | -5.15678 |
| C | 1.21051  | -1.40723 | -3.78849 |
| C | 1.84114  | -2.28989 | -1.63847 |
| C | 1.10827  | -1.28367 | -1.01442 |
| C | 0.42346  | -0.33401 | -1.78151 |
| C | 0.47288  | -0.39368 | -3.16449 |
| C | 1.89448  | -2.35661 | -3.02658 |
| H | 2.36328  | -3.01296 | -1.02084 |
| H | -0.14117 | 0.44715  | -1.28341 |
| H | -0.04768 | 0.33155  | -3.78013 |
| H | 2.46672  | -3.14191 | -3.51477 |
| N | 1.11517  | -1.31846 | 0.43566  |
| N | 0.48276  | -0.46128 | 1.03134  |
| C | -0.30176 | 0.40550  | 1.69194  |
| C | 0.16343  | 1.70207  | 2.02181  |
| C | -1.59643 | 0.02578  | 2.11500  |
| C | -0.64106 | 2.56962  | 2.74588  |
| H | 1.16298  | 2.00166  | 1.72901  |
| C | -2.39326 | 0.92995  | 2.81183  |
| H | -1.96356 | -0.96965 | 1.89519  |
| C | -1.92637 | 2.20062  | 3.14032  |
| H | -0.27070 | 3.55218  | 3.01751  |
| H | -3.39055 | 0.61893  | 3.11407  |
| O | -2.67601 | 3.13062  | 3.82710  |
| H | -3.43955 | 2.70871  | 4.23780  |
| H | 1.76622  | -2.14964 | -5.47531 |

## 5.4 $F_{OC}$ -0.0025 au OH-AB-OH Inversion TS Structure $S_0$ State

$$E_h = -723.3027$$

Cartesian Coordinates:

|   |          |          |          |
|---|----------|----------|----------|
| O | 1.23567  | -1.41164 | -5.14309 |
| C | 1.22204  | -1.40103 | -3.76916 |
| C | 1.63188  | -2.41374 | -1.62157 |
| C | 1.14545  | -1.27411 | -0.97936 |
| C | 0.72271  | -0.18542 | -1.75099 |
| C | 0.76453  | -0.24180 | -3.13777 |
| C | 1.65521  | -2.48971 | -3.00979 |
| H | 1.98451  | -3.23775 | -1.00975 |
| H | 0.38702  | 0.71855  | -1.25559 |
| H | 0.45642  | 0.60153  | -3.74691 |
| H | 2.01857  | -3.38980 | -3.50142 |
| N | 1.20413  | -1.31124 | 0.46842  |
| N | 0.52365  | -0.49307 | 1.11329  |
| C | -0.26577 | 0.42113  | 1.71031  |
| C | -0.14457 | 0.62613  | 3.11264  |
| C | -1.30423 | 1.12248  | 1.04270  |
| C | -0.96253 | 1.50657  | 3.79178  |
| H | 0.62241  | 0.06937  | 3.63804  |
| C | -2.16089 | 1.96771  | 1.72995  |
| H | -1.44654 | 0.96469  | -0.01991 |
| C | -1.98211 | 2.17711  | 3.10357  |
| H | -0.85701 | 1.66879  | 4.85841  |
| H | -2.96459 | 2.47774  | 1.20351  |
| O | -2.77038 | 3.01159  | 3.82690  |
| H | -3.45662 | 3.40669  | 3.27502  |
| H | 1.58331  | -2.25513 | -5.45627 |

## 5.5 $F_{OC}$ -0.0025 au OH-AB-OH Cis Structure $S_0$ State

$$E_h = -723.3481$$

Cartesian Coordinates:

|   |          |          |          |
|---|----------|----------|----------|
| O | 1.03726  | -1.74312 | -4.21379 |
| C | 1.04609  | -1.67857 | -2.84206 |
| C | 0.84182  | -2.66841 | -0.65282 |
| C | 1.08352  | -1.42840 | -0.05654 |
| C | 1.35155  | -0.32057 | -0.87355 |
| C | 1.34235  | -0.44671 | -2.25583 |
| C | 0.79095  | -2.78999 | -2.03763 |
| H | 0.69229  | -3.53537 | -0.01840 |
| H | 1.58505  | 0.63785  | -0.42560 |
| H | 1.56648  | 0.40095  | -2.89398 |
| H | 0.58039  | -3.75710 | -2.48864 |
| N | 1.25774  | -1.42349 | 1.36701  |
| N | 0.82462  | -0.53746 | 2.12757  |
| C | -0.08854 | 0.49186  | 1.73573  |
| C | 0.11291  | 1.75397  | 2.31014  |
| C | -1.24740 | 0.26134  | 0.98593  |
| C | -0.77598 | 2.79177  | 2.07398  |
| H | 0.97827  | 1.90573  | 2.94603  |
| C | -2.16378 | 1.28696  | 0.78376  |
| H | -1.44797 | -0.72234 | 0.57897  |
| C | -1.92198 | 2.55903  | 1.31007  |
| H | -0.61893 | 3.77443  | 2.50361  |
| H | -3.07317 | 1.09440  | 0.21930  |
| O | -2.77764 | 3.60828  | 1.12412  |
| H | -3.57924 | 3.31362  | 0.67551  |
| H | 0.85282  | -2.64686 | -4.49588 |

## 5.6 $F_{OC}$ -0.0050 au OH-AB-OH Trans Structure $S_0$ State

$$E_h = -723.3832$$

Cartesian Coordinates:

|   |          |          |          |
|---|----------|----------|----------|
| O | 0.40635  | -0.47225 | -5.87865 |
| C | 0.40303  | -0.46844 | -4.49853 |
| C | 1.13131  | -1.31457 | -2.36312 |
| C | 0.32817  | -0.38147 | -1.70151 |
| C | -0.44189 | 0.51318  | -2.46589 |
| C | -0.40495 | 0.47025  | -3.85112 |
| C | 1.17131  | -1.36102 | -3.75370 |
| H | 1.72260  | -2.00154 | -1.76775 |
| H | -1.06361 | 1.23551  | -1.95112 |
| H | -0.99623 | 1.15721  | -4.44816 |
| H | 1.80188  | -2.09360 | -4.25442 |
| N | 0.36435  | -0.42351 | -0.28855 |
| N | -0.36171 | 0.42042  | 0.29819  |
| C | -0.32667 | 0.37967  | 1.70154  |
| C | -1.13600 | 1.32062  | 2.36000  |
| C | 0.44307  | -0.51528 | 2.46730  |
| C | -1.18465 | 1.37722  | 3.74147  |
| H | -1.72509 | 2.00552  | 1.76004  |
| C | 0.39904  | -0.46407 | 3.84887  |
| H | 1.06835  | -1.24230 | 1.96502  |
| C | -0.41550 | 0.48300  | 4.49521  |
| H | -1.80472 | 2.09814  | 4.26068  |
| H | 0.99404  | -1.15592 | 4.43881  |
| O | -0.50319 | 0.58496  | 5.83839  |
| H | 0.05353  | -0.06236 | 6.29059  |
| H | 1.00251  | -1.16479 | -6.18660 |

## 5.7 $F_{OC}$ -0.0050 au OH-AB-OH Rotation TS Structure $S_0$ State

$$E_h = -723.3061$$

Cartesian Coordinates:

|   |          |          |          |
|---|----------|----------|----------|
| O | 1.35654  | -1.44867 | -4.69138 |
| C | 1.30308  | -1.42219 | -3.30827 |
| C | 1.11090  | -2.53892 | -1.17421 |
| C | 1.15491  | -1.28859 | -0.49430 |
| C | 1.28595  | -0.10878 | -1.28297 |
| C | 1.34461  | -0.18696 | -2.66863 |
| C | 1.18297  | -2.59773 | -2.55040 |
| H | 1.02161  | -3.44334 | -0.58310 |
| H | 1.31762  | 0.85322  | -0.78794 |
| H | 1.42592  | 0.71488  | -3.26718 |
| H | 1.14565  | -3.56503 | -3.04905 |
| N | 1.00954  | -1.27375 | 0.84574  |
| N | 1.14128  | -0.16576 | 1.51882  |
| C | -0.02484 | 0.49552  | 1.77520  |
| C | 0.08379  | 1.71033  | 2.50899  |
| C | -1.29938 | 0.11135  | 1.27921  |
| C | -1.01134 | 2.51410  | 2.71710  |
| H | 1.05732  | 1.98273  | 2.90017  |
| C | -2.39733 | 0.92162  | 1.49437  |
| H | -1.39211 | -0.81500 | 0.72797  |
| C | -2.26409 | 2.11958  | 2.21502  |
| H | -0.94000 | 3.43828  | 3.27842  |
| H | -3.37001 | 0.63586  | 1.10094  |
| O | -3.30435 | 2.95681  | 2.43505  |
| H | -4.14122 | 2.54915  | 2.17790  |
| H | 1.37475  | -2.36750 | -4.98290 |

## 5.8 $F_{OC}$ -0.0050 au OH–AB–OH Rotation Inversion TS Structure

### $S_0$ State

$$E_h = -723.3045$$

Cartesian Coordinates:

|   |          |          |          |
|---|----------|----------|----------|
| O | 1.25152  | -1.43177 | -5.17156 |
| C | 1.22190  | -1.41139 | -3.79674 |
| C | 1.82881  | -2.29460 | -1.64026 |
| C | 1.10464  | -1.27815 | -1.02495 |
| C | 0.43590  | -0.32414 | -1.79832 |
| C | 0.49290  | -0.38811 | -3.18270 |
| C | 1.88871  | -2.36632 | -3.02846 |
| H | 2.33885  | -3.02044 | -1.01561 |
| H | -0.12112 | 0.46479  | -1.30343 |
| H | -0.01475 | 0.34316  | -3.80255 |
| H | 2.45492  | -3.16042 | -3.51064 |
| N | 1.10653  | -1.30864 | 0.43204  |
| N | 0.47100  | -0.45221 | 1.02208  |
| C | -0.32008 | 0.41742  | 1.67923  |
| C | 0.14373  | 1.71383  | 2.00485  |
| C | -1.60443 | 0.02609  | 2.11900  |
| C | -0.65805 | 2.57619  | 2.73830  |
| H | 1.14337  | 2.01417  | 1.71296  |
| C | -2.40144 | 0.92647  | 2.82024  |
| H | -1.96170 | -0.97625 | 1.91482  |
| C | -1.93835 | 2.20067  | 3.14371  |
| H | -0.28708 | 3.55611  | 3.01787  |
| H | -3.39155 | 0.60894  | 3.13735  |
| O | -2.68687 | 3.12844  | 3.82864  |
| H | -3.38220 | 2.69779  | 4.33998  |
| H | 1.79356  | -2.17308 | -5.46661 |

## 5.9 $F_{OC}$ -0.0050 au OH-AB-OH Inversion TS Structure $S_0$ State

$$E_h = -723.3041$$

Cartesian Coordinates:

|   |          |          |          |
|---|----------|----------|----------|
| O | 1.26099  | -1.42485 | -5.15621 |
| C | 1.23014  | -1.40274 | -3.77555 |
| C | 1.61476  | -2.41326 | -1.62286 |
| C | 1.13422  | -1.26778 | -0.98661 |
| C | 0.72360  | -0.17962 | -1.76402 |
| C | 0.77651  | -0.23973 | -3.15249 |
| C | 1.64675  | -2.49315 | -3.01064 |
| H | 1.95890  | -3.23638 | -1.00483 |
| H | 0.38911  | 0.72705  | -1.27219 |
| H | 0.48045  | 0.60612  | -3.76483 |
| H | 2.00605  | -3.39854 | -3.49693 |
| N | 1.20452  | -1.29872 | 0.46424  |
| N | 0.52072  | -0.48566 | 1.11088  |
| C | -0.27334 | 0.42208  | 1.71018  |
| C | -0.14064 | 0.63121  | 3.11172  |
| C | -1.31606 | 1.12194  | 1.04634  |
| C | -0.95563 | 1.50949  | 3.79520  |
| H | 0.63074  | 0.07721  | 3.63335  |
| C | -2.16819 | 1.96705  | 1.73727  |
| H | -1.46379 | 0.96146  | -0.01553 |
| C | -1.98141 | 2.17725  | 3.11195  |
| H | -0.84482 | 1.67301  | 4.86094  |
| H | -2.97661 | 2.47611  | 1.21716  |
| O | -2.76232 | 3.00819  | 3.83884  |
| H | -3.46767 | 3.39176  | 3.30303  |
| H | 1.61534  | -2.27386 | -5.44546 |

## 5.10 $F_{OC}$ -0.0050 au OH-AB-OH Cis Structure $S_0$ State

$$E_h = -723.3470$$

Cartesian Coordinates:

|   |          |          |          |
|---|----------|----------|----------|
| O | 1.07214  | -1.76626 | -4.22707 |
| C | 1.06482  | -1.68343 | -2.84980 |
| C | 0.80404  | -2.65258 | -0.65721 |
| C | 1.07886  | -1.41700 | -0.06617 |
| C | 1.38456  | -0.32254 | -0.88695 |
| C | 1.38679  | -0.45685 | -2.26985 |
| C | 0.76630  | -2.78055 | -2.04203 |
| H | 0.62257  | -3.51091 | -0.01941 |
| H | 1.63933  | 0.63115  | -0.44016 |
| H | 1.64188  | 0.38153  | -2.90906 |
| H | 0.53221  | -3.74456 | -2.48919 |
| N | 1.26483  | -1.40702 | 1.35680  |
| N | 0.83320  | -0.52230 | 2.11763  |
| C | -0.08810 | 0.49934  | 1.73088  |
| C | 0.11319  | 1.76347  | 2.30186  |
| C | -1.24999 | 0.26123  | 0.98830  |
| C | -0.78016 | 2.79739  | 2.06701  |
| H | 0.97639  | 1.91690  | 2.94006  |
| C | -2.17125 | 1.28320  | 0.78947  |
| H | -1.45217 | -0.72630 | 0.59143  |
| C | -1.93033 | 2.55726  | 1.31159  |
| H | -0.62908 | 3.77880  | 2.50134  |
| H | -3.08636 | 1.08571  | 0.23591  |
| O | -2.79103 | 3.60294  | 1.12493  |
| H | -3.63274 | 3.28754  | 0.77484  |
| H | 0.87957  | -2.67438 | -4.48816 |



## 5.11 $F_{OC}$ -0.0075 au OH-AB-OH Trans Structure $S_0$ State

$$E_h = -723.3898$$

Cartesian Coordinates:

|   |          |          |          |
|---|----------|----------|----------|
| O | 0.40841  | -0.47465 | -5.88867 |
| C | 0.40011  | -0.46506 | -4.49968 |
| C | 1.13053  | -1.31355 | -2.36514 |
| C | 0.32791  | -0.38121 | -1.69915 |
| C | -0.44212 | 0.51325  | -2.46514 |
| C | -0.40656 | 0.47194  | -3.85242 |
| C | 1.16851  | -1.35763 | -3.75624 |
| H | 1.72227  | -2.00094 | -1.77086 |
| H | -1.06321 | 1.23471  | -1.94822 |
| H | -0.99963 | 1.16084  | -4.44613 |
| H | 1.79928  | -2.09033 | -4.25785 |
| N | 0.36599  | -0.42548 | -0.28831 |
| N | -0.36157 | 0.42033  | 0.30273  |
| C | -0.32478 | 0.37751  | 1.69926  |
| C | -1.13547 | 1.32019  | 2.36060  |
| C | 0.44577  | -0.51853 | 2.46834  |
| C | -1.18452 | 1.37724  | 3.73909  |
| H | -1.72465 | 2.00531  | 1.76076  |
| C | 0.40182  | -0.46743 | 3.84784  |
| H | 1.07165  | -1.24635 | 1.96796  |
| C | -0.41434 | 0.48166  | 4.49637  |
| H | -1.80371 | 2.09726  | 4.26058  |
| H | 0.99613  | -1.15857 | 4.43889  |
| O | -0.50580 | 0.58801  | 5.83058  |
| H | 0.04500  | -0.05260 | 6.30090  |
| H | 1.00831  | -1.17136 | -6.17911 |

## 5.12 $F_{OC}$ -0.0075 au OH-AB-OH Rotation TS Structure $S_0$ State

$$E_h = -723.3099$$

Cartesian Coordinates:

|   |          |          |          |
|---|----------|----------|----------|
| O | 1.42977  | -1.48421 | -4.72019 |
| C | 1.33245  | -1.43671 | -3.32948 |
| C | 1.07540  | -2.53615 | -1.19232 |
| C | 1.11728  | -1.28229 | -0.51560 |
| C | 1.26579  | -0.10911 | -1.31246 |
| C | 1.36351  | -0.19954 | -2.69759 |
| C | 1.17893  | -2.60379 | -2.56654 |
| H | 0.96989  | -3.43698 | -0.59832 |
| H | 1.29604  | 0.85739  | -0.82603 |
| H | 1.47591  | 0.69939  | -3.29649 |
| H | 1.14451  | -3.57558 | -3.05802 |
| N | 0.97867  | -1.26426 | 0.82291  |
| N | 1.11839  | -0.15603 | 1.49290  |
| C | -0.04328 | 0.51063  | 1.75353  |
| C | 0.08354  | 1.72554  | 2.48500  |
| C | -1.32971 | 0.11989  | 1.29264  |
| C | -1.00517 | 2.53140  | 2.71576  |
| H | 1.06445  | 1.99210  | 2.86134  |
| C | -2.42117 | 0.92727  | 1.53382  |
| H | -1.43377 | -0.81446 | 0.75674  |
| C | -2.26940 | 2.13089  | 2.24830  |
| H | -0.92393 | 3.45200  | 3.28137  |
| H | -3.40615 | 0.63621  | 1.17701  |
| O | -3.30275 | 2.96197  | 2.49444  |
| H | -4.15126 | 2.53972  | 2.30709  |
| H | 1.56380  | -2.40410 | -4.97527 |

### 5.13 $F_{OC}$ -0.0075 au OH-AB-OH Rotation Inversion TS Structure $S_0$ State

$$E_h = -723.3058$$

Cartesian Coordinates:

|   |          |          |          |
|---|----------|----------|----------|
| O | 1.27853  | -1.45090 | -5.18810 |
| C | 1.23405  | -1.41717 | -3.80687 |
| C | 1.81729  | -2.29727 | -1.64274 |
| C | 1.10124  | -1.27016 | -1.03705 |
| C | 0.44784  | -0.31370 | -1.81849 |
| C | 0.51260  | -0.38414 | -3.20414 |
| C | 1.88446  | -2.37580 | -3.03064 |
| H | 2.31509  | -3.02476 | -1.00989 |
| H | -0.10223 | 0.48320  | -1.32807 |
| H | 0.01731  | 0.35163  | -3.82941 |
| H | 2.44564  | -3.17865 | -3.50561 |
| N | 1.09484  | -1.29846 | 0.42657  |
| N | 0.45619  | -0.44227 | 1.01103  |
| C | -0.34126 | 0.43041  | 1.66408  |
| C | 0.12275  | 1.72573  | 1.98849  |
| C | -1.61370 | 0.02695  | 2.12490  |
| C | -0.67357 | 2.58157  | 2.73552  |
| H | 1.12187  | 2.02707  | 1.69554  |
| C | -2.40890 | 0.92243  | 2.83385  |
| H | -1.96144 | -0.98163 | 1.93552  |
| C | -1.94825 | 2.19950  | 3.15394  |
| H | -0.30060 | 3.55794  | 3.02415  |
| H | -3.39073 | 0.59810  | 3.16802  |
| O | -2.69262 | 3.12312  | 3.84232  |
| H | -3.33213 | 2.69456  | 4.42439  |
| H | 1.82445  | -2.19874 | -5.45808 |

## 5.14 $F_{OC}$ -0.0075 au OH-AB-OH Inversion TS Structure $S_0$ State

$$E_h = -723.3074$$

Cartesian Coordinates:

|   |          |          |          |
|---|----------|----------|----------|
| O | 1.29191  | -1.44013 | -5.17047 |
| C | 1.23984  | -1.40582 | -3.78334 |
| C | 1.59386  | -2.41339 | -1.62462 |
| C | 1.11870  | -1.26142 | -0.99483 |
| C | 0.72176  | -0.17410 | -1.77989 |
| C | 0.78919  | -0.23864 | -3.16969 |
| C | 1.63701  | -2.49810 | -3.01158 |
| H | 1.92828  | -3.23536 | -0.99953 |
| H | 0.38790  | 0.73580  | -1.29299 |
| H | 0.50787  | 0.60990  | -3.78615 |
| H | 1.99223  | -3.40948 | -3.49124 |
| N | 1.20236  | -1.28572 | 0.45774  |
| N | 0.51611  | -0.47703 | 1.10716  |
| C | -0.28108 | 0.42421  | 1.70932  |
| C | -0.13516 | 0.63808  | 3.11023  |
| C | -1.33039 | 1.12163  | 1.05117  |
| C | -0.94664 | 1.51362  | 3.79930  |
| H | 0.64176  | 0.08740  | 3.62699  |
| C | -2.17727 | 1.96606  | 1.74705  |
| H | -1.48553 | 0.95787  | -0.00963 |
| C | -1.98041 | 2.17763  | 3.12268  |
| H | -0.82912 | 1.67867  | 4.86407  |
| H | -2.99175 | 2.47329  | 1.23467  |
| O | -2.75340 | 3.00441  | 3.85419  |
| H | -3.47800 | 3.37683  | 3.33630  |
| H | 1.66229  | -2.29060 | -5.43397 |

### 5.15 $F_{OC}$ -0.0075 au OH-AB-OH Cis Structure $S_0$ State

$$E_h = -723.3474$$

Cartesian Coordinates:

|   |          |          |          |
|---|----------|----------|----------|
| O | 1.10978  | -1.79455 | -4.24185 |
| C | 1.08437  | -1.69110 | -2.85942 |
| C | 0.76769  | -2.63626 | -0.66372 |
| C | 1.07120  | -1.40451 | -0.07779 |
| C | 1.41181  | -0.32426 | -0.90313 |
| C | 1.42765  | -0.46875 | -2.28625 |
| C | 0.74474  | -2.77274 | -2.04809 |
| H | 0.55662  | -3.48497 | -0.02217 |
| H | 1.68534  | 0.62529  | -0.45833 |
| H | 1.71305  | 0.35927  | -2.92664 |
| H | 0.49041  | -3.73415 | -2.49094 |
| N | 1.26882  | -1.39095 | 1.34421  |
| N | 0.83935  | -0.50773 | 2.10630  |
| C | -0.08898 | 0.50728  | 1.72573  |
| C | 0.11288  | 1.77278  | 2.29424  |
| C | -1.25485 | 0.26239  | 0.99134  |
| C | -0.78462 | 2.80354  | 2.06139  |
| H | 0.97438  | 1.92719  | 2.93437  |
| C | -2.18058 | 1.28120  | 0.79709  |
| H | -1.45939 | -0.72880 | 0.60476  |
| C | -1.93932 | 2.55704  | 1.31512  |
| H | -0.63846 | 3.78354  | 2.50039  |
| H | -3.10188 | 1.07974  | 0.25535  |
| O | -2.80528 | 3.59974  | 1.12793  |
| H | -3.68004 | 3.27185  | 0.88751  |
| H | 0.92479  | -2.71029 | -4.48041 |

## 5.16 $F_{OC}$ -0.0100 au OH-AB-OH Trans Structure $S_0$ State

$$E_h = -723.3993$$

Cartesian Coordinates:

|   |          |          |          |
|---|----------|----------|----------|
| O | 0.41091  | -0.47755 | -5.89912 |
| C | 0.39739  | -0.46191 | -4.50125 |
| C | 1.12967  | -1.31246 | -2.36728 |
| C | 0.32730  | -0.38055 | -1.69534 |
| C | -0.44280 | 0.51386  | -2.46473 |
| C | -0.40816 | 0.47364  | -3.85374 |
| C | 1.16588  | -1.35445 | -3.75837 |
| H | 1.72194  | -2.00038 | -1.77412 |
| H | -1.06367 | 1.23495  | -1.94679 |
| H | -1.00295 | 1.16444  | -4.44454 |
| H | 1.79703  | -2.08749 | -4.26065 |
| N | 0.36781  | -0.42767 | -0.28928 |
| N | -0.36213 | 0.42103  | 0.30777  |
| C | -0.32302 | 0.37550  | 1.69617  |
| C | -1.13523 | 1.32007  | 2.36182  |
| C | 0.44875  | -0.52209 | 2.46947  |
| C | -1.18459 | 1.37748  | 3.73715  |
| H | -1.72453 | 2.00543  | 1.76225  |
| C | 0.40505  | -0.47129 | 3.84670  |
| H | 1.07505  | -1.25051 | 1.97062  |
| C | -0.41302 | 0.48016  | 4.49753  |
| H | -1.80288 | 2.09655  | 4.26103  |
| H | 0.99864  | -1.16169 | 4.43892  |
| O | -0.50821 | 0.59084  | 5.82291  |
| H | 0.03665  | -0.04300 | 6.31112  |
| H | 1.01449  | -1.17835 | -6.17121 |

## 5.17 $F_{OC}$ -0.0100 au OH-AB-OH Rotation TS Structure $S_0$ State

$$E_h = -723.3162$$

Cartesian Coordinates:

|   |          |          |          |
|---|----------|----------|----------|
| O | 1.53102  | -1.54193 | -4.75427 |
| C | 1.36658  | -1.46291 | -3.35901 |
| C | 1.01519  | -2.53280 | -1.21963 |
| C | 1.06229  | -1.27257 | -0.54933 |
| C | 1.23757  | -0.10987 | -1.35877 |
| C | 1.38881  | -0.22098 | -2.73990 |
| C | 1.16156  | -2.61688 | -2.58904 |
| H | 0.88242  | -3.42628 | -0.61983 |
| H | 1.26975  | 0.86309  | -0.88523 |
| H | 1.54780  | 0.67049  | -3.34060 |
| H | 1.12537  | -3.59398 | -3.07044 |
| N | 0.93621  | -1.24960 | 0.78705  |
| N | 1.08756  | -0.13959 | 1.45234  |
| C | -0.06733 | 0.53310  | 1.72105  |
| C | 0.08252  | 1.74918  | 2.44819  |
| C | -1.36980 | 0.13147  | 1.31356  |
| C | -0.99812 | 2.55439  | 2.71442  |
| H | 1.07422  | 2.01305  | 2.79716  |
| C | -2.45305 | 0.93167  | 1.59595  |
| H | -1.48927 | -0.81199 | 0.79677  |
| C | -2.27762 | 2.14266  | 2.30076  |
| H | -0.90223 | 3.47233  | 3.28202  |
| H | -3.45261 | 0.63010  | 1.29307  |
| O | -3.30210 | 2.96274  | 2.58895  |
| H | -4.15834 | 2.52840  | 2.47702  |
| H | 1.87334  | -2.42209 | -4.94768 |

## 5.18 $F_{OC}$ -0.0100 au OH-AB-OH Rotation Inversion TS Structure $S_0$ State

$$E_h = -723.3090$$

Cartesian Coordinates:

|   |          |          |          |
|---|----------|----------|----------|
| O | 1.30909  | -1.47845 | -5.20756 |
| C | 1.24819  | -1.42702 | -3.82018 |
| C | 1.81824  | -2.28936 | -1.64547 |
| C | 1.09491  | -1.26031 | -1.05124 |
| C | 0.44240  | -0.31400 | -1.84522 |
| C | 0.51654  | -0.39490 | -3.23176 |
| C | 1.89730  | -2.37622 | -3.03224 |
| H | 2.31175  | -3.01102 | -1.00229 |
| H | -0.11316 | 0.48430  | -1.36278 |
| H | 0.02108  | 0.33476  | -3.86503 |
| H | 2.46810  | -3.17944 | -3.49684 |
| N | 1.06561  | -1.29509 | 0.41579  |
| N | 0.42728  | -0.43456 | 0.99433  |
| C | -0.37194 | 0.44527  | 1.64011  |
| C | 0.10406  | 1.73312  | 1.97602  |
| C | -1.63379 | 0.03600  | 2.12655  |
| C | -0.67636 | 2.58194  | 2.74674  |
| H | 1.10468  | 2.02922  | 1.68236  |
| C | -2.41965 | 0.92805  | 2.84830  |
| H | -1.97922 | -0.97507 | 1.94628  |
| C | -1.94903 | 2.20151  | 3.17579  |
| H | -0.29138 | 3.54786  | 3.05366  |
| H | -3.39553 | 0.60304  | 3.19789  |
| O | -2.67763 | 3.12043  | 3.87825  |
| H | -3.28842 | 2.69925  | 4.49660  |
| H | 1.87559  | -2.22079 | -5.44885 |



## 5.19 $F_{OC}$ -0.0100 au OH-AB-OH Inversion TS Structure $S_0$ State

$$E_h = -723.3127$$

Cartesian Coordinates:

|   |          |          |          |
|---|----------|----------|----------|
| O | 1.32903  | -1.45764 | -5.18561 |
| C | 1.25095  | -1.41041 | -3.79244 |
| C | 1.56707  | -2.41473 | -1.62693 |
| C | 1.09853  | -1.25483 | -1.00435 |
| C | 0.71837  | -0.16819 | -1.79868 |
| C | 0.80411  | -0.23804 | -3.18953 |
| C | 1.62385  | -2.50536 | -3.01255 |
| H | 1.88940  | -3.23559 | -0.99376 |
| H | 0.38606  | 0.74607  | -1.31828 |
| H | 0.54203  | 0.61378  | -3.81098 |
| H | 1.97346  | -3.42380 | -3.48454 |
| N | 1.19793  | -1.27153 | 0.44878  |
| N | 0.51038  | -0.46648 | 1.10196  |
| C | -0.28823 | 0.42835  | 1.70763  |
| C | -0.12692 | 0.64822  | 3.10782  |
| C | -1.34740 | 1.12113  | 1.05729  |
| C | -0.93494 | 1.51974  | 3.80384  |
| H | 0.65735  | 0.10230  | 3.61848  |
| C | -2.18885 | 1.96355  | 1.75958  |
| H | -1.51207 | 0.95314  | -0.00195 |
| C | -1.97959 | 2.17759  | 3.13589  |
| H | -0.80896 | 1.68687  | 4.86744  |
| H | -3.01139 | 2.46713  | 1.25648  |
| O | -2.74464 | 2.99903  | 3.87312  |
| H | -3.48903 | 3.35981  | 3.37514  |
| H | 1.72580  | -2.30448 | -5.42092 |

## 5.20 $F_{OC}$ -0.0100 au OH-AB-OH Cis Structure $S_0$ State

$$E_h = -723.3493$$

Cartesian Coordinates:

|   |          |          |          |
|---|----------|----------|----------|
| O | 1.15025  | -1.82786 | -4.25755 |
| C | 1.10442  | -1.70136 | -2.87068 |
| C | 0.73163  | -2.61949 | -0.67224 |
| C | 1.06084  | -1.39118 | -0.09134 |
| C | 1.43453  | -0.32589 | -0.92177 |
| C | 1.46586  | -0.48235 | -2.30462 |
| C | 0.72489  | -2.76628 | -2.05569 |
| H | 0.49236  | -3.45779 | -0.02685 |
| H | 1.72524  | 0.61987  | -0.47952 |
| H | 1.78175  | 0.33404  | -2.94622 |
| H | 0.45251  | -3.72540 | -2.49395 |
| N | 1.27051  | -1.37476 | 1.32933  |
| N | 0.84368  | -0.49316 | 2.09331  |
| C | -0.09137 | 0.51562  | 1.71979  |
| C | 0.11163  | 1.78208  | 2.28637  |
| C | -1.26174 | 0.26434  | 0.99414  |
| C | -0.79002 | 2.81012  | 2.05588  |
| H | 0.97185  | 1.93707  | 2.92804  |
| C | -2.19164 | 1.28030  | 0.80529  |
| H | -1.46895 | -0.73034 | 0.61787  |
| C | -1.94940 | 2.55781  | 1.31930  |
| H | -0.64787 | 3.78879  | 2.49903  |
| H | -3.11910 | 1.07586  | 0.27549  |
| O | -2.82134 | 3.59787  | 1.13063  |
| H | -3.72177 | 3.26825  | 1.02432  |
| H | 0.99073  | -2.75436 | -4.47137 |

## 5.21 $F_{OC} + 0.0025$ au OH-AB-OH Trans Structure $S_0$ State

$$E_h = -723.3790$$

Cartesian Coordinates:

|   |          |          |          |
|---|----------|----------|----------|
| O | 0.40148  | -0.46662 | -5.85125 |
| C | 0.41234  | -0.47925 | -4.49390 |
| C | 1.13536  | -1.31937 | -2.35658 |
| C | 0.32842  | -0.38168 | -1.70116 |
| C | -0.44211 | 0.51365  | -2.46740 |
| C | -0.40024 | 0.46497  | -3.84700 |
| C | 1.18178  | -1.37331 | -3.74398 |
| H | 1.72533  | -2.00493 | -1.75815 |
| H | -1.06633 | 1.23901  | -1.96129 |
| H | -0.98636 | 1.14603  | -4.45352 |
| H | 1.81153  | -2.10509 | -4.24257 |
| N | 0.36088  | -0.41940 | -0.29348 |
| N | -0.36563 | 0.42494  | 0.28803  |
| C | -0.33396 | 0.38809  | 1.70094  |
| C | -1.13985 | 1.32491  | 2.36078  |
| C | 0.43393  | -0.50456 | 2.46334  |
| C | -1.18661 | 1.37930  | 3.74770  |
| H | -1.72906 | 2.00985  | 1.76086  |
| C | 0.39059  | -0.45416 | 3.84886  |
| H | 1.05739  | -1.22934 | 1.95466  |
| C | -0.41909 | 0.48712  | 4.49497  |
| H | -1.80909 | 2.10293  | 4.26208  |
| H | 0.98855  | -1.14931 | 4.43550  |
| O | -0.49136 | 0.57121  | 5.86310  |
| H | 0.08206  | -0.09534 | 6.25954  |
| H | 0.98538  | -1.14507 | -6.21306 |

## 5.22 $F_{OC} + 0.0025$ au OH–AB–OH Rotation TS Structure $S_0$ State

$$E_h = -723.3093$$

Cartesian Coordinates:

|   |          |          |          |
|---|----------|----------|----------|
| O | 1.23788  | -1.40232 | -4.63568 |
| C | 1.25046  | -1.41047 | -3.28038 |
| C | 1.14545  | -2.54127 | -1.15115 |
| C | 1.20881  | -1.29087 | -0.47216 |
| C | 1.32337  | -0.10322 | -1.25459 |
| C | 1.32245  | -0.17012 | -2.63377 |
| C | 1.16600  | -2.59787 | -2.52597 |
| H | 1.07014  | -3.44516 | -0.55727 |
| H | 1.36900  | 0.85261  | -0.74889 |
| H | 1.36604  | 0.72793  | -3.23987 |
| H | 1.10740  | -3.55766 | -3.03296 |
| N | 1.06185  | -1.28357 | 0.86812  |
| N | 1.18183  | -0.17158 | 1.54980  |
| C | 0.01012  | 0.47537  | 1.80752  |
| C | 0.08170  | 1.69117  | 2.54618  |
| C | -1.24947 | 0.09735  | 1.26957  |
| C | -1.03018 | 2.47970  | 2.73395  |
| H | 1.04723  | 1.99151  | 2.93818  |
| C | -2.36424 | 0.90123  | 1.46300  |
| H | -1.32568 | -0.80665 | 0.68098  |
| C | -2.26669 | 2.08727  | 2.19330  |
| H | -0.97093 | 3.41711  | 3.27602  |
| H | -3.31520 | 0.61468  | 1.01910  |
| O | -3.32828 | 2.92548  | 2.39218  |
| H | -4.10520 | 2.59787  | 1.92256  |
| H | 1.17791  | -2.29732 | -4.99320 |

## 5.23 $F_{OC} + 0.0025$ au OH-AB-OH Rotation Inversion TS Structure $S_0$ State

$$E_h = -723.3120$$

Cartesian Coordinates:

|   |          |          |          |
|---|----------|----------|----------|
| O | 1.16418  | -1.38486 | -5.12895 |
| C | 1.18203  | -1.39500 | -3.77449 |
| C | 1.86415  | -2.27632 | -1.63948 |
| C | 1.11814  | -1.28893 | -0.99405 |
| C | 0.40038  | -0.34766 | -1.74799 |
| C | 0.43091  | -0.39942 | -3.12786 |
| C | 1.90064  | -2.33398 | -3.02670 |
| H | 2.41059  | -2.99408 | -1.03701 |
| H | -0.17654 | 0.41888  | -1.24200 |
| H | -0.11504 | 0.31425  | -3.73417 |
| H | 2.48210  | -3.10267 | -3.52826 |
| N | 1.13834  | -1.33724 | 0.44078  |
| N | 0.51079  | -0.48176 | 1.05277  |
| C | -0.26082 | 0.37415  | 1.72452  |
| C | 0.20376  | 1.67184  | 2.06707  |
| C | -1.57165 | 0.00918  | 2.12464  |
| C | -0.60915 | 2.54565  | 2.77480  |
| H | 1.19917  | 1.97638  | 1.76552  |
| C | -2.36539 | 0.91188  | 2.82533  |
| H | -1.95278 | -0.97345 | 1.87308  |
| C | -1.89839 | 2.18109  | 3.15667  |
| H | -0.24646 | 3.53740  | 3.02415  |
| H | -3.36808 | 0.60526  | 3.11631  |
| O | -2.65227 | 3.10174  | 3.86906  |
| H | -3.58286 | 2.85379  | 3.83073  |
| H | 1.70299  | -2.09757 | -5.49522 |

## 5.24 $F_{OC} + 0.0025$ au OH–AB–OH Inversion TS Structure $S_0$ State

$$E_h = -723.3058$$

Cartesian Coordinates:

|   |          |          |          |
|---|----------|----------|----------|
| O | 1.20008  | -1.39048 | -5.11995 |
| C | 1.21127  | -1.40071 | -3.76045 |
| C | 1.65868  | -2.41558 | -1.62027 |
| C | 1.15720  | -1.28669 | -0.96744 |
| C | 0.71366  | -0.19772 | -1.73217 |
| C | 0.74216  | -0.24830 | -3.11499 |
| C | 1.67216  | -2.48581 | -3.00815 |
| H | 2.02600  | -3.24000 | -1.01791 |
| H | 0.37286  | 0.70166  | -1.23294 |
| H | 0.41524  | 0.58970  | -3.72066 |
| H | 2.04571  | -3.37601 | -3.50777 |
| N | 1.19648  | -1.33572 | 0.47115  |
| N | 0.52467  | -0.50562 | 1.11532  |
| C | -0.25147 | 0.42105  | 1.70936  |
| C | -0.14980 | 0.61904  | 3.11391  |
| C | -1.28598 | 1.12505  | 1.03826  |
| C | -0.97212 | 1.50307  | 3.78735  |
| H | 0.61011  | 0.05732  | 3.64506  |
| C | -2.14908 | 1.97029  | 1.72110  |
| H | -1.42152 | 0.97250  | -0.02537 |
| C | -1.98224 | 2.17819  | 3.09271  |
| H | -0.87403 | 1.66231  | 4.85582  |
| H | -2.94492 | 2.48215  | 1.18446  |
| O | -2.78295 | 3.02047  | 3.81125  |
| H | -3.43634 | 3.43289  | 3.23288  |
| H | 1.54648  | -2.21741 | -5.47759 |

## 5.25 $F_{OC} + 0.0025$ au OH-AB-OH Cis Structure $S_0$ State

$$E_h = -723.3547$$

Cartesian Coordinates:

|   |          |          |          |
|---|----------|----------|----------|
| O | 0.97995  | -1.71260 | -4.19139 |
| C | 1.01491  | -1.67782 | -2.83197 |
| C | 0.91862  | -2.69701 | -0.64899 |
| C | 1.08570  | -1.44850 | -0.04184 |
| C | 1.27644  | -0.31861 | -0.85433 |
| C | 1.25121  | -0.43414 | -2.23428 |
| C | 0.84835  | -2.81217 | -2.03271 |
| H | 0.83495  | -3.57693 | -0.02018 |
| H | 1.46390  | 0.64954  | -0.40650 |
| H | 1.41484  | 0.42766  | -2.87128 |
| H | 0.69179  | -3.78570 | -2.48988 |
| N | 1.23580  | -1.45644 | 1.38086  |
| N | 0.80108  | -0.56750 | 2.14299  |
| C | -0.09278 | 0.47928  | 1.74309  |
| C | 0.11097  | 1.73607  | 2.32632  |
| C | -1.24844 | 0.26590  | 0.98198  |
| C | -0.76900 | 2.78304  | 2.09046  |
| H | 0.98196  | 1.88284  | 2.95639  |
| C | -2.15451 | 1.29978  | 0.77708  |
| H | -1.44810 | -0.70961 | 0.55556  |
| C | -1.90839 | 2.56711  | 1.31279  |
| H | -0.59783 | 3.76747  | 2.51137  |
| H | -3.05394 | 1.11931  | 0.19351  |
| O | -2.75548 | 3.62450  | 1.13003  |
| H | -3.46569 | 3.38686  | 0.52151  |
| H | 0.83316  | -2.61053 | -4.51358 |

## 5.26 $F_{OC} + 0.0050$ au OH-AB-OH Trans Structure $S_0$ State

$$E_h = -723.3828$$

Cartesian Coordinates:

|   |          |          |          |
|---|----------|----------|----------|
| O | 0.39999  | -0.46491 | -5.84215 |
| C | 0.41541  | -0.48282 | -4.49267 |
| C | 1.13718  | -1.32150 | -2.35480 |
| C | 0.32860  | -0.38187 | -1.69932 |
| C | -0.44242 | 0.51407  | -2.46776 |
| C | -0.39898 | 0.46355  | -3.84521 |
| C | 1.18560  | -1.37779 | -3.74055 |
| H | 1.72683  | -2.00672 | -1.75561 |
| H | -1.06746 | 1.24041  | -1.96454 |
| H | -0.98340 | 1.14266  | -4.45509 |
| H | 1.81510  | -2.10932 | -4.23876 |
| N | 0.36043  | -0.41886 | -0.29613 |
| N | -0.36754 | 0.42715  | 0.28574  |
| C | -0.33639 | 0.39090  | 1.69895  |
| C | -1.14150 | 1.32677  | 2.36123  |
| C | 0.43118  | -0.50134 | 2.46202  |
| C | -1.18760 | 1.38040  | 3.74949  |
| H | -1.73083 | 2.01184  | 1.76151  |
| C | 0.38797  | -0.45108 | 3.84856  |
| H | 1.05409  | -1.22544 | 1.95137  |
| C | -0.42036 | 0.48859  | 4.49522  |
| H | -1.81095 | 2.10501  | 4.26236  |
| H | 0.98690  | -1.14733 | 4.43450  |
| O | -0.48721 | 0.56638  | 5.87159  |
| H | 0.09132  | -0.10607 | 6.24950  |
| H | 0.97935  | -1.13811 | -6.22242 |



## 5.27 $F_{OC} + 0.0050$ au OH-AB-OH Rotation TS Structure $S_0$ State

$$E_h = -723.3153$$

Cartesian Coordinates:

|   |          |          |          |
|---|----------|----------|----------|
| O | 1.23181  | -1.40054 | -4.62628 |
| C | 1.24789  | -1.41424 | -3.28057 |
| C | 1.14408  | -2.54093 | -1.15046 |
| C | 1.21317  | -1.28773 | -0.47393 |
| C | 1.33210  | -0.10020 | -1.25914 |
| C | 1.32689  | -0.16913 | -2.63502 |
| C | 1.16106  | -2.60279 | -2.52348 |
| H | 1.06566  | -3.44199 | -0.55262 |
| H | 1.38280  | 0.85551  | -0.75363 |
| H | 1.37057  | 0.72493  | -3.24658 |
| H | 1.09706  | -3.56202 | -3.02983 |
| N | 1.06887  | -1.28316 | 0.86480  |
| N | 1.18783  | -0.16887 | 1.55021  |
| C | 0.01611  | 0.47429  | 1.81101  |
| C | 0.07964  | 1.69026  | 2.55178  |
| C | -1.24447 | 0.09538  | 1.27398  |
| C | -1.03767 | 2.47204  | 2.74403  |
| H | 1.04578  | 2.00237  | 2.93379  |
| C | -2.36433 | 0.89354  | 1.47392  |
| H | -1.31993 | -0.80138 | 0.67449  |
| C | -2.27360 | 2.07683  | 2.20599  |
| H | -0.97831 | 3.41448  | 3.27824  |
| H | -3.31288 | 0.60324  | 1.02706  |
| O | -3.34438 | 2.91072  | 2.41125  |
| H | -4.09040 | 2.62912  | 1.86770  |
| H | 1.16640  | -2.28854 | -5.00216 |

## 5.28 $F_{OC} + 0.0050$ au OH-AB-OH Rotation Inversion TS Structure $S_0$ State

$$E_h = -723.3189$$

Cartesian Coordinates:

|   |          |          |          |
|---|----------|----------|----------|
| O | 1.13221  | -1.36660 | -5.11538 |
| C | 1.16689  | -1.38635 | -3.76864 |
| C | 1.87523  | -2.26695 | -1.64189 |
| C | 1.12400  | -1.28779 | -0.98493 |
| C | 0.39066  | -0.34988 | -1.73202 |
| C | 0.41089  | -0.39833 | -3.11017 |
| C | 1.90196  | -2.32122 | -3.02807 |
| H | 2.43381  | -2.98169 | -1.04702 |
| H | -0.19036 | 0.41069  | -1.22200 |
| H | -0.14593 | 0.31054  | -3.71190 |
| H | 2.48647  | -3.08232 | -3.53671 |
| N | 1.15561  | -1.34174 | 0.44179  |
| N | 0.52583  | -0.49144 | 1.06359  |
| C | -0.24272 | 0.35245  | 1.74188  |
| C | 0.21261  | 1.65492  | 2.08898  |
| C | -1.55631 | -0.02015 | 2.14244  |
| C | -0.61036 | 2.52247  | 2.79419  |
| H | 1.20221  | 1.97001  | 1.77921  |
| C | -2.35296 | 0.87388  | 2.84685  |
| H | -1.93305 | -1.00164 | 1.87959  |
| C | -1.89636 | 2.14874  | 3.17536  |
| H | -0.25944 | 3.52112  | 3.03406  |
| H | -3.35338 | 0.56475  | 3.14094  |
| O | -2.67285 | 3.05307  | 3.90374  |
| H | -3.56647 | 3.06910  | 3.54215  |
| H | 1.67049  | -2.06709 | -5.50680 |

## 5.29 $F_{OC} + 0.0050$ au OH–AB–OH Inversion TS Structure $S_0$ State

$$E_h = -723.3105$$

Cartesian Coordinates:

|   |          |          |          |
|---|----------|----------|----------|
| O | 1.18980  | -1.38185 | -5.11004 |
| C | 1.20896  | -1.40184 | -3.75798 |
| C | 1.67062  | -2.41636 | -1.62036 |
| C | 1.15826  | -1.29305 | -0.96261 |
| C | 0.70444  | -0.20490 | -1.72622 |
| C | 0.73027  | -0.25326 | -3.10683 |
| C | 1.68300  | -2.48461 | -3.00745 |
| H | 2.04524  | -3.23986 | -1.02127 |
| H | 0.35822  | 0.69191  | -1.22659 |
| H | 0.39465  | 0.58133  | -3.71209 |
| H | 2.06397  | -3.36958 | -3.50974 |
| N | 1.18950  | -1.34807 | 0.46971  |
| N | 0.52240  | -0.51146 | 1.11514  |
| C | -0.24565 | 0.42055  | 1.70845  |
| C | -0.15246 | 0.61550  | 3.11471  |
| C | -1.27985 | 1.12682  | 1.03761  |
| C | -0.97567 | 1.50156  | 3.78662  |
| H | 0.60445  | 0.05110  | 3.64792  |
| C | -2.14435 | 1.97244  | 1.71957  |
| H | -1.41419 | 0.97690  | -0.02632 |
| C | -1.98176 | 2.17968  | 3.09036  |
| H | -0.87980 | 1.65919  | 4.85613  |
| H | -2.93673 | 2.48568  | 1.17895  |
| O | -2.78740 | 3.02649  | 3.80741  |
| H | -3.42244 | 3.45010  | 3.21680  |
| H | 1.53884  | -2.19880 | -5.48894 |

### 5.30 $F_{OC} + 0.0050$ au OH-AB-OH Cis Structure $S_0$ State

$$E_h = -723.3603$$

Cartesian Coordinates:

|   |          |          |          |
|---|----------|----------|----------|
| O | 0.95763  | -1.70445 | -4.18208 |
| C | 1.00284  | -1.68152 | -2.82919 |
| C | 0.95575  | -2.70943 | -0.64876 |
| C | 1.08400  | -1.45749 | -0.03621 |
| C | 1.23746  | -0.31936 | -0.84801 |
| C | 1.20729  | -0.43208 | -2.22648 |
| C | 0.87919  | -2.82417 | -2.03152 |
| H | 0.90378  | -3.59340 | -0.02209 |
| H | 1.40193  | 0.65330  | -0.40139 |
| H | 1.34273  | 0.43442  | -2.86354 |
| H | 0.75105  | -3.80033 | -2.49104 |
| N | 1.22229  | -1.47231 | 1.38493  |
| N | 0.78725  | -0.58152 | 2.14869  |
| C | -0.09607 | 0.47426  | 1.74568  |
| C | 0.10961  | 1.72812  | 2.33371  |
| C | -1.25134 | 0.27024  | 0.98023  |
| C | -0.76612 | 2.78008  | 2.09943  |
| H | 0.98401  | 1.87186  | 2.96024  |
| C | -2.15192 | 1.30865  | 0.77514  |
| H | -1.45150 | -0.70096 | 0.54440  |
| C | -1.90300 | 2.57322  | 1.31630  |
| H | -0.58721 | 3.76508  | 2.51634  |
| H | -3.04666 | 1.13510  | 0.18262  |
| O | -2.74618 | 3.63510  | 1.13557  |
| H | -3.41189 | 3.42858  | 0.46794  |
| H | 0.83456  | -2.59921 | -4.52390 |

### 5.31 $F_{OC} + 0.0075$ au OH-AB-OH Trans Structure $S_0$ State

$$E_h = -723.3893$$

Cartesian Coordinates:

|   |          |          |          |
|---|----------|----------|----------|
| O | 0.39884  | -0.46361 | -5.83346 |
| C | 0.41826  | -0.48614 | -4.49247 |
| C | 1.13892  | -1.32356 | -2.35367 |
| C | 0.32882  | -0.38209 | -1.69600 |
| C | -0.44296 | 0.51479  | -2.46812 |
| C | -0.39814 | 0.46266  | -3.84267 |
| C | 1.18924  | -1.38209 | -3.73709 |
| H | 1.72839  | -2.00859 | -1.75377 |
| H | -1.06881 | 1.24214  | -1.96754 |
| H | -0.98090 | 1.13989  | -4.45621 |
| H | 1.81865  | -2.11356 | -4.23500 |
| N | 0.36068  | -0.41911 | -0.29960 |
| N | -0.36970 | 0.42964  | 0.28444  |
| C | -0.33841 | 0.39324  | 1.69550  |
| C | -1.14296 | 1.32840  | 2.36135  |
| C | 0.42911  | -0.49889 | 2.46082  |
| C | -1.18864 | 1.38153  | 3.75106  |
| H | -1.73245 | 2.01359  | 1.76197  |
| C | 0.38571  | -0.44841 | 3.84825  |
| H | 1.05151  | -1.22235 | 1.94861  |
| C | -0.42168 | 0.49011  | 4.49500  |
| H | -1.81295 | 2.10722  | 4.26191  |
| H | 0.98538  | -1.14548 | 4.43380  |
| O | -0.48361 | 0.56218  | 5.88079  |
| H | 0.09959  | -0.11563 | 6.24127  |
| H | 0.97344  | -1.13132 | -6.23215 |

### 5.32 $F_{OC} + 0.0075$ au OH–AB–OH Rotation TS Structure $S_0$ State

$$E_h = -723.3240$$

Cartesian Coordinates:

|   |          |          |          |
|---|----------|----------|----------|
| O | 1.24362  | -1.40535 | -4.62176 |
| C | 1.25343  | -1.42187 | -3.28551 |
| C | 1.13805  | -2.54044 | -1.15309 |
| C | 1.21088  | -1.28311 | -0.47985 |
| C | 1.33810  | -0.09688 | -1.27004 |
| C | 1.33643  | -0.17049 | -2.64232 |
| C | 1.15846  | -2.61031 | -2.52380 |
| H | 1.05352  | -3.43747 | -0.54994 |
| H | 1.39290  | 0.85965  | -0.76645 |
| H | 1.38561  | 0.71830  | -3.26085 |
| H | 1.09136  | -3.56998 | -3.02806 |
| N | 1.07053  | -1.28141 | 0.85658  |
| N | 1.18996  | -0.16438 | 1.54628  |
| C | 0.01918  | 0.47566  | 1.81127  |
| C | 0.07680  | 1.69175  | 2.55452  |
| C | -1.24529 | 0.09462  | 1.28198  |
| C | -1.04579 | 2.46619  | 2.75633  |
| H | 1.04480  | 2.01673  | 2.92183  |
| C | -2.36970 | 0.88554  | 1.49457  |
| H | -1.32245 | -0.79507 | 0.67227  |
| C | -2.28336 | 2.06656  | 2.22810  |
| H | -0.98460 | 3.41385  | 3.28215  |
| H | -3.31822 | 0.59019  | 1.05079  |
| O | -3.36474 | 2.89389  | 2.44548  |
| H | -4.07332 | 2.67177  | 1.82920  |
| H | 1.17562  | -2.28674 | -5.01511 |

### 5.33 $F_{OC} + 0.0075$ au OH-AB-OH Rotation Inversion TS Structure $S_0$ State

$$E_h = -723.3287$$

Cartesian Coordinates:

|   |          |          |          |
|---|----------|----------|----------|
| O | 1.12323  | -1.34724 | -5.10638 |
| C | 1.16345  | -1.37831 | -3.76733 |
| C | 1.89547  | -2.24938 | -1.64475 |
| C | 1.12474  | -1.28657 | -0.97995 |
| C | 0.36806  | -0.36197 | -1.72513 |
| C | 0.38681  | -0.40703 | -3.10125 |
| C | 1.91957  | -2.30178 | -3.02935 |
| H | 2.47278  | -2.95261 | -1.05403 |
| H | -0.22699 | 0.38713  | -1.21451 |
| H | -0.18364 | 0.29172  | -3.70189 |
| H | 2.51828  | -3.04887 | -3.54150 |
| N | 1.17640  | -1.33403 | 0.43823  |
| N | 0.52828  | -0.49844 | 1.06706  |
| C | -0.25232 | 0.32091  | 1.74946  |
| C | 0.17278  | 1.64065  | 2.08555  |
| C | -1.55138 | -0.08493 | 2.17986  |
| C | -0.66157 | 2.48522  | 2.80339  |
| H | 1.14772  | 1.98069  | 1.75617  |
| C | -2.36367 | 0.79449  | 2.88215  |
| H | -1.90680 | -1.07568 | 1.92154  |
| C | -1.93690 | 2.08267  | 3.19845  |
| H | -0.32412 | 3.49050  | 3.04027  |
| H | -3.36018 | 0.47993  | 3.17873  |
| O | -2.77076 | 2.94553  | 3.93112  |
| H | -3.22301 | 3.54346  | 3.32293  |
| H | 1.67248  | -2.02750 | -5.51963 |

### 5.34 $F_{OC} + 0.0075$ au OH–AB–OH Inversion TS Structure $S_0$ State

$$E_h = -723.3173$$

Cartesian Coordinates:

|   |          |          |          |
|---|----------|----------|----------|
| O | 1.18436  | -1.37489 | -5.10144 |
| C | 1.20877  | -1.40386 | -3.75703 |
| C | 1.68160  | -2.41698 | -1.62100 |
| C | 1.15633  | -1.29929 | -0.95867 |
| C | 0.69246  | -0.21256 | -1.72279 |
| C | 0.71816  | -0.25924 | -3.10106 |
| C | 1.69540  | -2.48393 | -3.00683 |
| H | 2.06336  | -3.23878 | -1.02406 |
| H | 0.33889  | 0.68144  | -1.22374 |
| H | 0.37426  | 0.57132  | -3.70696 |
| H | 2.08525  | -3.36353 | -3.51090 |
| N | 1.18089  | -1.36022 | 0.46648  |
| N | 0.51840  | -0.51695 | 1.11429  |
| C | -0.24096 | 0.41944  | 1.70743  |
| C | -0.15528 | 0.61184  | 3.11579  |
| C | -1.27582 | 1.12888  | 1.03812  |
| C | -0.97852 | 1.50026  | 3.78703  |
| H | 0.59895  | 0.04473  | 3.65065  |
| C | -2.14019 | 1.97554  | 1.71996  |
| H | -1.41030 | 0.98171  | -0.02603 |
| C | -1.98077 | 2.18199  | 3.09013  |
| H | -0.88380 | 1.65619  | 4.85766  |
| H | -2.92907 | 2.49087  | 1.17598  |
| O | -2.79015 | 3.03435  | 3.80624  |
| H | -3.40763 | 3.46831  | 3.20454  |
| H | 1.53772  | -2.18100 | -5.50084 |



### 5.35 $F_{OC} + 0.0075$ au OH-AB-OH Cis Structure $S_0$ State

$$E_h = -723.3674$$

Cartesian Coordinates:

|   |          |          |          |
|---|----------|----------|----------|
| O | 0.93953  | -1.70129 | -4.17432 |
| C | 0.99311  | -1.68808 | -2.82816 |
| C | 0.99215  | -2.72053 | -0.64948 |
| C | 1.08031  | -1.46565 | -0.03165 |
| C | 1.19720  | -0.32117 | -0.84432 |
| C | 1.16413  | -0.43287 | -2.22103 |
| C | 0.91177  | -2.83685 | -2.03099 |
| H | 0.97129  | -3.60686 | -0.02416 |
| H | 1.33844  | 0.65593  | -0.39999 |
| H | 1.27247  | 0.43677  | -2.85889 |
| H | 0.81335  | -3.81537 | -2.49208 |
| N | 1.20689  | -1.48796 | 1.38698  |
| N | 0.77190  | -0.59503 | 2.15320  |
| C | -0.10006 | 0.46999  | 1.74794  |
| C | 0.10806  | 1.72074  | 2.34123  |
| C | -1.25558 | 0.27617  | 0.97874  |
| C | -0.76334 | 2.77807  | 2.10943  |
| H | 0.98611  | 1.86095  | 2.96406  |
| C | -2.15038 | 1.31950  | 0.77427  |
| H | -1.45700 | -0.69050 | 0.53359  |
| C | -1.89816 | 2.58095  | 1.32153  |
| H | -0.57625 | 3.76328  | 2.52291  |
| H | -3.04068 | 1.15345  | 0.17325  |
| O | -2.73732 | 3.64771  | 1.14329  |
| H | -3.36049 | 3.47278  | 0.42696  |
| H | 0.84203  | -2.59232 | -4.53529 |

### 5.36 $F_{OC} +0.0100$ au OH-AB-OH Trans Structure $S_0$ State

$$E_h = -723.3986$$

Cartesian Coordinates:

|   |          |          |          |
|---|----------|----------|----------|
| O | 0.39729  | -0.46185 | -5.82488 |
| C | 0.42086  | -0.48917 | -4.49220 |
| C | 1.14130  | -1.32633 | -2.35321 |
| C | 0.32942  | -0.38275 | -1.69179 |
| C | -0.44342 | 0.51539  | -2.46839 |
| C | -0.39764 | 0.46211  | -3.84004 |
| C | 1.19320  | -1.38671 | -3.73393 |
| H | 1.73067  | -2.01126 | -1.75285 |
| H | -1.06988 | 1.24348  | -1.96996 |
| H | -0.97888 | 1.13762  | -4.45694 |
| H | 1.82237  | -2.11794 | -4.23203 |
| N | 0.36166  | -0.42022 | -0.30341 |
| N | -0.37211 | 0.43243  | 0.28422  |
| C | -0.34035 | 0.39549  | 1.69052  |
| C | -1.14461 | 1.33027  | 2.36153  |
| C | 0.42722  | -0.49666 | 2.45986  |
| C | -1.18992 | 1.38297  | 3.75219  |
| H | -1.73439 | 2.01578  | 1.76271  |
| C | 0.38336  | -0.44567 | 3.84784  |
| H | 1.04946  | -1.21991 | 1.94699  |
| C | -0.42316 | 0.49181  | 4.49514  |
| H | -1.81529 | 2.10986  | 4.26099  |
| H | 0.98377  | -1.14357 | 4.43333  |
| O | -0.48021 | 0.55821  | 5.89033  |
| H | 0.10755  | -0.12482 | 6.23286  |
| H | 0.96705  | -1.12398 | -6.24188 |

### 5.37 $F_{OC} + 0.0100$ au OH-AB-OH Rotation TS Structure $S_0$ State

$$E_h = -723.3353$$

Cartesian Coordinates:

|   |          |          |          |
|---|----------|----------|----------|
| O | 1.27237  | -1.41629 | -4.62186 |
| C | 1.26648  | -1.43311 | -3.29508 |
| C | 1.12824  | -2.53973 | -1.15913 |
| C | 1.20223  | -1.27699 | -0.48997 |
| C | 1.34078  | -0.09320 | -1.28705 |
| C | 1.35009  | -0.17397 | -2.65542 |
| C | 1.15846  | -2.62027 | -2.52697 |
| H | 1.03542  | -3.43164 | -0.54953 |
| H | 1.39855  | 0.86508  | -0.78705 |
| H | 1.40977  | 0.70834  | -3.28217 |
| H | 1.09101  | -3.58136 | -3.02778 |
| N | 1.06727  | -1.27832 | 0.84375  |
| N | 1.18845  | -0.15819 | 1.53814  |
| C | 0.01927  | 0.47910  | 1.80862  |
| C | 0.07283  | 1.69530  | 2.55471  |
| C | -1.25176 | 0.09400  | 1.29413  |
| C | -1.05499 | 2.46168  | 2.77056  |
| H | 1.04351  | 2.03468  | 2.90267  |
| C | -2.38018 | 0.87577  | 1.52532  |
| H | -1.33286 | -0.78922 | 0.67549  |
| C | -2.29612 | 2.05549  | 2.25948  |
| H | -0.99071 | 3.41490  | 3.28723  |
| H | -3.33092 | 0.57378  | 1.09080  |
| O | -3.38996 | 2.87367  | 2.49385  |
| H | -4.04996 | 2.73314  | 1.80393  |
| H | 1.20451  | -2.29142 | -5.03212 |

### 5.38 $F_{OC} + 0.0100$ au OH-AB-OH Rotation Inversion TS Structure $S_0$ State

$$E_h = -723.3406$$

Cartesian Coordinates:

|   |          |          |          |
|---|----------|----------|----------|
| O | 1.11978  | -1.34351 | -5.09880 |
| C | 1.16425  | -1.38010 | -3.76709 |
| C | 1.89538  | -2.25124 | -1.64442 |
| C | 1.12348  | -1.28709 | -0.97578 |
| C | 0.36627  | -0.36118 | -1.72395 |
| C | 0.38615  | -0.40714 | -3.09799 |
| C | 1.92136  | -2.30498 | -3.02706 |
| H | 2.47272  | -2.95485 | -1.05402 |
| H | -0.22958 | 0.38903  | -1.21603 |
| H | -0.18301 | 0.29050  | -3.70107 |
| H | 2.52013  | -3.05172 | -3.53909 |
| N | 1.17678  | -1.33787 | 0.43445  |
| N | 0.52935  | -0.49976 | 1.06826  |
| C | -0.24596 | 0.31696  | 1.75158  |
| C | 0.18051  | 1.63842  | 2.09263  |
| C | -1.54990 | -0.08227 | 2.18417  |
| C | -0.65211 | 2.48505  | 2.80943  |
| H | 1.15123  | 1.98085  | 1.75323  |
| C | -2.35856 | 0.79851  | 2.88847  |
| H | -1.91390 | -1.06691 | 1.91436  |
| C | -1.92751 | 2.08505  | 3.20824  |
| H | -0.31765 | 3.49431  | 3.03451  |
| H | -3.35988 | 0.48883  | 3.17577  |
| O | -2.76487 | 2.96179  | 3.92785  |
| H | -3.26003 | 3.50544  | 3.30187  |
| H | 1.66430  | -2.01758 | -5.53029 |

### 5.39 $F_{OC} + 0.0100$ au OH–AB–OH Inversion TS Structure $S_0$ State

$$E_h = -723.3263$$

Cartesian Coordinates:

|   |          |          |          |
|---|----------|----------|----------|
| O | 1.18360  | -1.36948 | -5.09423 |
| C | 1.21073  | -1.40669 | -3.75764 |
| C | 1.69205  | -2.41734 | -1.62230 |
| C | 1.15178  | -1.30535 | -0.95565 |
| C | 0.67783  | -0.22073 | -1.72195 |
| C | 0.70569  | -0.26626 | -3.09772 |
| C | 1.70967  | -2.48366 | -3.00637 |
| H | 2.08092  | -3.23659 | -1.02637 |
| H | 0.31474  | 0.67003  | -1.22439 |
| H | 0.35361  | 0.55953  | -3.70530 |
| H | 2.10986  | -3.35768 | -3.51133 |
| N | 1.17121  | -1.37203 | 0.46150  |
| N | 0.51278  | -0.52219 | 1.11293  |
| C | -0.23775 | 0.41722  | 1.70643  |
| C | -0.15864 | 0.60771  | 3.11738  |
| C | -1.27418 | 1.13088  | 1.03991  |
| C | -0.98091 | 1.49905  | 3.78871  |
| H | 0.59327  | 0.03790  | 3.65355  |
| C | -2.13669 | 1.97943  | 1.72230  |
| H | -1.41022 | 0.98649  | -0.02432 |
| C | -1.97939 | 2.18515  | 3.09208  |
| H | -0.88621 | 1.65340  | 4.86054  |
| H | -2.92201 | 2.49760  | 1.17553  |
| O | -2.79124 | 3.04431  | 3.80765  |
| H | -3.39069 | 3.48897  | 3.19552  |
| H | 1.54248  | -2.16406 | -5.51353 |

## 5.40 $F_{OC} + 0.0100$ au OH-AB-OH Cis Structure $S_0$ State

$$E_h = -723.3761$$

Cartesian Coordinates:

|   |          |          |          |
|---|----------|----------|----------|
| O | 0.92458  | -1.70168 | -4.16769 |
| C | 0.98511  | -1.69654 | -2.82841 |
| C | 1.02686  | -2.73019 | -0.65072 |
| C | 1.07538  | -1.47305 | -0.02781 |
| C | 1.15719  | -0.32398 | -0.84254 |
| C | 1.12255  | -0.43590 | -2.21738 |
| C | 0.94452  | -2.84948 | -2.03074 |
| H | 1.03561  | -3.61740 | -0.02617 |
| H | 1.27587  | 0.65725  | -0.40128 |
| H | 1.20532  | 0.43549  | -2.85666 |
| H | 0.87581  | -3.82975 | -2.49282 |
| N | 1.19137  | -1.50275 | 1.38751  |
| N | 0.75658  | -0.60745 | 2.15695  |
| C | -0.10437 | 0.46624  | 1.75042  |
| C | 0.10629  | 1.71402  | 2.34889  |
| C | -1.26045 | 0.28289  | 0.97774  |
| C | -0.76098 | 2.77674  | 2.11998  |
| H | 0.98825  | 1.85076  | 2.96765  |
| C | -2.14954 | 1.33109  | 0.77432  |
| H | -1.46332 | -0.67915 | 0.52338  |
| C | -1.89403 | 2.58937  | 1.32789  |
| H | -0.56555 | 3.76212  | 2.52999  |
| H | -3.03544 | 1.17267  | 0.16504  |
| O | -2.72943 | 3.66099  | 1.15220  |
| H | -3.31143 | 3.51754  | 0.39497  |
| H | 0.85272  | -2.58802 | -4.54771 |

## 6 Cartesian coordinates and energies of deprotonated OH-AB-O<sup>-</sup> structures in field free conditions

### 6.1 Field Free OH-AB-O<sup>-</sup> Trans Structure $S_0$ State

$$E_h = -722.8491$$

Cartesian Coordinates:

|   |          |          |          |
|---|----------|----------|----------|
| N | 0.03222  | 0.09777  | -0.67632 |
| N | 0.03422  | 0.10218  | 0.60875  |
| C | -0.75140 | -2.27269 | -0.52984 |
| C | -1.13334 | -3.43113 | -1.19763 |
| C | -1.14597 | -3.47502 | -2.59303 |
| C | -0.77218 | -2.34670 | -3.31954 |
| H | -0.09760 | -0.30468 | -3.20596 |
| H | -0.74103 | -2.23687 | 0.55236  |
| H | -1.42533 | -4.31211 | -0.62567 |
| H | -0.78431 | -2.38776 | -4.40416 |
| C | -0.39068 | -1.18940 | -2.64965 |
| C | -0.36936 | -1.11963 | -1.24450 |
| C | 0.41190  | 1.24852  | 1.24400  |
| C | 0.40642  | 1.22685  | 2.66708  |
| C | 0.81051  | 2.46245  | 0.60576  |
| C | 0.76620  | 2.31800  | 3.41311  |
| H | 0.10201  | 0.29945  | 3.14730  |
| C | 1.17210  | 3.55952  | 1.33654  |
| H | 0.81783  | 2.48826  | -0.47883 |
| C | 1.17657  | 3.56881  | 2.79683  |
| H | 0.75654  | 2.28440  | 4.49940  |
| H | 1.47500  | 4.48200  | 0.84679  |
| O | 1.51021  | 4.57928  | 3.45929  |
| O | -1.51986 | -4.60912 | -3.29669 |
| H | -1.75061 | -5.30443 | -2.66989 |

## 6.2 Field Free OH-AB-O<sup>-</sup> Rotation TS Structure S<sub>0</sub> State

$$E_h = -722.8014$$

Cartesian Coordinates:

|   |          |          |          |
|---|----------|----------|----------|
| N | 1.55106  | -0.45182 | -0.46892 |
| N | 1.52165  | -0.47879 | 0.85010  |
| C | 0.40958  | 1.69293  | -0.71938 |
| C | -0.06188 | 2.69282  | -1.57115 |
| C | 0.13092  | 2.62040  | -2.94554 |
| C | 0.80938  | 1.51793  | -3.47543 |
| H | 1.80707  | -0.33808 | -3.07494 |
| H | 0.23506  | 1.76697  | 0.34792  |
| H | -0.59476 | 3.54255  | -1.14166 |
| H | 0.95840  | 1.46054  | -4.55035 |
| C | 1.28209  | 0.51246  | -2.65077 |
| C | 1.09989  | 0.55132  | -1.23221 |
| C | 0.49997  | -1.08216 | 1.45595  |
| C | 0.56082  | -1.18951 | 2.89094  |
| C | -0.65889 | -1.62973 | 0.79224  |
| C | -0.44636 | -1.74686 | 3.61091  |
| H | 1.44858  | -0.78672 | 3.37127  |
| C | -1.67327 | -2.18604 | 1.50278  |
| H | -0.68882 | -1.56812 | -0.28999 |
| C | -1.64355 | -2.28787 | 2.96546  |
| H | -0.40551 | -1.81145 | 4.69446  |
| H | -2.55908 | -2.57991 | 1.01185  |
| O | -2.57544 | -2.79711 | 3.61196  |
| O | -0.33558 | 3.59766  | -3.83356 |
| H | -0.78026 | 4.28271  | -3.32212 |



### 6.3 Field Free OH-AB-O<sup>-</sup> Rotation Inversion TS Structure $S_0$ State

$$E_h = -722.7823$$

Cartesian Coordinates:

|   |          |          |          |
|---|----------|----------|----------|
| N | 0.22463  | 1.23072  | -1.28034 |
| N | 0.25336  | 1.23035  | -0.01258 |
| C | -0.66908 | -1.13011 | -1.29826 |
| C | -0.98934 | -2.27220 | -2.03016 |
| C | -0.72688 | -2.32595 | -3.39859 |
| C | -0.15574 | -1.22464 | -4.03659 |
| H | 0.57694  | 0.78812  | -3.78404 |
| H | -0.88315 | -1.08402 | -0.23726 |
| H | -1.45155 | -3.12471 | -1.53193 |
| H | 0.04276  | -1.27675 | -5.10282 |
| C | 0.14543  | -0.08434 | -3.30147 |
| C | -0.08846 | -0.01702 | -1.91928 |
| C | 0.32913  | 1.22312  | 1.30142  |
| C | 0.25852  | 0.02878  | 2.11494  |
| C | 0.51406  | 2.45329  | 2.04081  |
| C | 0.36555  | 0.05443  | 3.47618  |
| H | 0.14095  | -0.92268 | 1.60298  |
| C | 0.59997  | 2.49779  | 3.40192  |
| H | 0.57580  | 3.36540  | 1.45157  |
| C | 0.53366  | 1.29514  | 4.22345  |
| H | 0.32276  | -0.86208 | 4.06008  |
| H | 0.72958  | 3.44064  | 3.92817  |
| O | 0.61578  | 1.32380  | 5.47108  |
| O | -1.02118 | -3.44086 | -4.16719 |
| H | -1.40087 | -4.12061 | -3.59850 |

## 6.4 Field Free OH-AB-O<sup>-</sup> Inversion TS Structure $S_0$ State

$$E_h = -722.7828$$

Cartesian Coordinates:

|   |          |          |          |
|---|----------|----------|----------|
| N | 0.39605  | 1.28823  | -1.25376 |
| N | 0.39620  | 1.29212  | 0.01409  |
| C | -0.71526 | -0.97806 | -1.34512 |
| C | -1.10406 | -2.07970 | -2.10608 |
| C | -0.75778 | -2.15903 | -3.45415 |
| C | -0.03579 | -1.12151 | -4.04485 |
| H | 0.87679  | 0.80689  | -3.73077 |
| H | -0.99796 | -0.91376 | -0.30136 |
| H | -1.68487 | -2.87951 | -1.64628 |
| H | 0.22656  | -1.19296 | -5.09605 |
| C | 0.33038  | -0.01853 | -3.28307 |
| C | 0.01636  | 0.07051  | -1.91806 |
| C | 0.38167  | 1.18212  | 1.32850  |
| C | 0.57057  | 2.35525  | 2.15113  |
| C | 0.22071  | -0.05632 | 2.06036  |
| C | 0.57134  | 2.31518  | 3.51546  |
| H | 0.70504  | 3.29576  | 1.62222  |
| C | 0.24810  | -0.11656 | 3.42456  |
| H | 0.10525  | -0.97195 | 1.48660  |
| C | 0.41136  | 1.07016  | 4.25601  |
| H | 0.70279  | 3.21957  | 4.10480  |
| H | 0.14105  | -1.06444 | 3.94700  |
| O | 0.41621  | 1.02085  | 5.50586  |
| O | -1.11292 | -3.23671 | -4.24932 |
| H | -1.59454 | -3.87610 | -3.71185 |

## 6.5 Field Free OH-AB-O<sup>-</sup> Cis Structure $S_0$ State

$$E_h = -722.8220$$

Cartesian Coordinates:

|   |          |          |          |
|---|----------|----------|----------|
| N | 1.43738  | -1.59385 | -0.64643 |
| N | 1.44322  | -1.59459 | 0.62977  |
| C | 0.94026  | 0.73865  | -1.32159 |
| C | 0.43294  | 1.62274  | -2.26757 |
| C | -0.28160 | 1.14659  | -3.36848 |
| C | -0.46532 | -0.22395 | -3.52656 |
| H | -0.05683 | -2.17757 | -2.72069 |
| H | 1.47959  | 1.12229  | -0.46273 |
| H | 0.59218  | 2.69315  | -2.14327 |
| H | -1.01628 | -0.58806 | -4.38812 |
| C | 0.06347  | -1.10682 | -2.58850 |
| C | 0.75689  | -0.64920 | -1.45636 |
| C | 0.59485  | -0.91434 | 1.47886  |
| C | 0.99761  | -0.93016 | 2.84644  |
| C | -0.66628 | -0.30510 | 1.19269  |
| C | 0.27337  | -0.32516 | 3.83937  |
| H | 1.93176  | -1.43922 | 3.07136  |
| C | -1.41960 | 0.27164  | 2.18084  |
| H | -1.05892 | -0.32648 | 0.18382  |
| C | -0.99238 | 0.33434  | 3.57296  |
| H | 0.61753  | -0.33712 | 4.87043  |
| H | -2.39009 | 0.70493  | 1.95147  |
| O | -1.67728 | 0.89236  | 4.46313  |
| O | -0.81222 | 1.99162  | -4.32983 |
| H | -0.67372 | 2.90520  | -4.05478 |

## 7 Cartesian coordinates and energies of deprotonated OH-AB-O<sup>-</sup> structures in $F_{NN}$ conditions

### 7.1 $F_{NN}$ -0.0025 au OH-AB-O<sup>-</sup> Trans Structure $S_0$ State

$$E_h = -722.8447$$

Cartesian Coordinates:

|   |          |          |          |
|---|----------|----------|----------|
| N | 0.03288  | 0.09971  | -0.67939 |
| N | 0.03503  | 0.10435  | 0.61138  |
| C | -0.74998 | -2.26849 | -0.53069 |
| C | -1.13186 | -3.42668 | -1.19839 |
| C | -1.14519 | -3.47255 | -2.59360 |
| C | -0.77162 | -2.34490 | -3.32048 |
| H | -0.09639 | -0.30106 | -3.20748 |
| H | -0.73967 | -2.23296 | 0.55148  |
| H | -1.42338 | -4.30629 | -0.62401 |
| H | -0.78373 | -2.38584 | -4.40584 |
| C | -0.38972 | -1.18650 | -2.65175 |
| C | -0.36714 | -1.11301 | -1.24509 |
| C | 0.41050  | 1.24401  | 1.24561  |
| C | 0.40554  | 1.22418  | 2.67276  |
| C | 0.80933  | 2.45883  | 0.60391  |
| C | 0.76489  | 2.31398  | 3.41610  |
| H | 0.10142  | 0.29799  | 3.15468  |
| C | 1.17056  | 3.55477  | 1.33173  |
| H | 0.81538  | 2.48101  | -0.48068 |
| C | 1.17556  | 3.56477  | 2.79451  |
| H | 0.75592  | 2.28298  | 4.50190  |
| H | 1.47387  | 4.47886  | 0.84517  |
| O | 1.50886  | 4.57573  | 3.44830  |
| O | -1.52139 | -4.61355 | -3.29524 |
| H | -1.74962 | -5.30142 | -2.65937 |

## 7.2 $F_{NN}$ -0.0025 au OH-AB-O<sup>-</sup> Rotation TS Structure $S_0$ State

$$E_h = -722.8008$$

Cartesian Coordinates:

|   |          |          |          |
|---|----------|----------|----------|
| N | 1.54258  | -0.45172 | -0.47305 |
| N | 1.51449  | -0.47765 | 0.85136  |
| C | 0.39936  | 1.69354  | -0.72418 |
| C | -0.06891 | 2.69252  | -1.57537 |
| C | 0.12351  | 2.62051  | -2.95112 |
| C | 0.79695  | 1.51623  | -3.48029 |
| H | 1.79033  | -0.34500 | -3.07897 |
| H | 0.23016  | 1.77292  | 0.34359  |
| H | -0.59887 | 3.54360  | -1.14446 |
| H | 0.94895  | 1.45839  | -4.55563 |
| C | 1.26610  | 0.50690  | -2.65559 |
| C | 1.08816  | 0.54568  | -1.23438 |
| C | 0.50064  | -1.08160 | 1.45937  |
| C | 0.55691  | -1.17931 | 2.89885  |
| C | -0.65336 | -1.64349 | 0.79348  |
| C | -0.44782 | -1.73790 | 3.61805  |
| H | 1.43837  | -0.76602 | 3.38112  |
| C | -1.66312 | -2.20376 | 1.50205  |
| H | -0.67784 | -1.58944 | -0.28925 |
| C | -1.63769 | -2.29471 | 2.96858  |
| H | -0.41224 | -1.79419 | 4.70174  |
| H | -2.54354 | -2.61296 | 1.01390  |
| O | -2.56638 | -2.81100 | 3.60652  |
| O | -0.34872 | 3.60557  | -3.83750 |
| H | -0.68694 | 4.33702  | -3.30901 |

### 7.3 $F_{NN}$ -0.0025 au OH-AB-O<sup>-</sup> Rotation Inversion TS Structure

#### $S_0$ State

$$E_h = -722.7761$$

Cartesian Coordinates:

|   |          |          |          |
|---|----------|----------|----------|
| N | 0.23829  | 1.23067  | -1.28559 |
| N | 0.26321  | 1.23078  | -0.01204 |
| C | -0.65643 | -1.12501 | -1.29622 |
| C | -0.98433 | -2.26635 | -2.02472 |
| C | -0.73502 | -2.32213 | -3.39501 |
| C | -0.16932 | -1.22152 | -4.03830 |
| H | 0.57108  | 0.79151  | -3.79269 |
| H | -0.85884 | -1.07974 | -0.23319 |
| H | -1.44146 | -3.11786 | -1.51960 |
| H | 0.02399  | -1.27488 | -5.10618 |
| C | 0.13996  | -0.08000 | -3.30702 |
| C | -0.08032 | -0.00843 | -1.92143 |
| C | 0.33439  | 1.22378  | 1.29615  |
| C | 0.25598  | 0.02433  | 2.11102  |
| C | 0.51932  | 2.45591  | 2.04166  |
| C | 0.35490  | 0.04618  | 3.46922  |
| H | 0.13875  | -0.92603 | 1.59680  |
| C | 0.59890  | 2.49752  | 3.39993  |
| H | 0.58502  | 3.36911  | 1.45440  |
| C | 0.52475  | 1.28927  | 4.21903  |
| H | 0.30564  | -0.86857 | 4.05459  |
| H | 0.72772  | 3.43619  | 3.93288  |
| O | 0.60182  | 1.31524  | 5.46061  |
| O | -1.04043 | -3.44378 | -4.15954 |
| H | -1.37494 | -4.13057 | -3.57114 |

## 7.4 $F_{NN}$ -0.0025 au OH-AB-O<sup>-</sup> Inversion TS Structure $S_0$ State

$$E_h = -722.7764$$

Cartesian Coordinates:

|   |          |          |          |
|---|----------|----------|----------|
| N | 0.41429  | 1.28558  | -1.25854 |
| N | 0.41076  | 1.29037  | 0.01514  |
| C | -0.69810 | -0.97574 | -1.34102 |
| C | -1.09716 | -2.07489 | -2.09922 |
| C | -0.76877 | -2.15318 | -3.45126 |
| C | -0.05392 | -1.11495 | -4.04873 |
| H | 0.86858  | 0.81206  | -3.74141 |
| H | -0.96596 | -0.91502 | -0.29351 |
| H | -1.67131 | -2.87505 | -1.63108 |
| H | 0.20048  | -1.18613 | -5.10268 |
| C | 0.32335  | -0.01273 | -3.29003 |
| C | 0.02763  | 0.07760  | -1.91947 |
| C | 0.39149  | 1.18194  | 1.32333  |
| C | 0.57840  | 2.35704  | 2.15227  |
| C | 0.22245  | -0.06121 | 2.05610  |
| C | 0.56800  | 2.31556  | 3.51317  |
| H | 0.71886  | 3.29799  | 1.62561  |
| C | 0.23686  | -0.12367 | 3.41667  |
| H | 0.11217  | -0.97647 | 1.48066  |
| C | 0.39588  | 1.06618  | 4.25069  |
| H | 0.69652  | 3.21585  | 4.10856  |
| H | 0.12341  | -1.06948 | 3.94066  |
| O | 0.38771  | 1.01554  | 5.49403  |
| O | -1.13859 | -3.23577 | -4.24308 |
| H | -1.56977 | -3.88993 | -3.68099 |

## 7.5 $F_{NN}$ -0.0025 au OH-AB-O<sup>-</sup> Cis Structure $S_0$ State

$$E_h = -722.8150$$

Cartesian Coordinates:

|   |          |          |          |
|---|----------|----------|----------|
| N | 1.42099  | -1.63632 | -0.65254 |
| N | 1.42973  | -1.64594 | 0.62959  |
| C | 0.92439  | 0.70879  | -1.28086 |
| C | 0.42636  | 1.61125  | -2.21218 |
| C | -0.26973 | 1.15834  | -3.33501 |
| C | -0.43857 | -0.20786 | -3.53136 |
| H | -0.03517 | -2.18008 | -2.76214 |
| H | 1.44127  | 1.07573  | -0.40144 |
| H | 0.57316  | 2.67947  | -2.05593 |
| H | -0.98317 | -0.55517 | -4.40460 |
| C | 0.08266  | -1.11190 | -2.60714 |
| C | 0.75542  | -0.68051 | -1.45091 |
| C | 0.59055  | -0.95698 | 1.46853  |
| C | 1.00075  | -0.92544 | 2.83741  |
| C | -0.67656 | -0.36212 | 1.16662  |
| C | 0.29164  | -0.26888 | 3.80490  |
| H | 1.93225  | -1.43131 | 3.07875  |
| C | -1.41714 | 0.26285  | 2.13040  |
| H | -1.08183 | -0.44077 | 0.16540  |
| C | -0.96808 | 0.39782  | 3.51345  |
| H | 0.64075  | -0.23669 | 4.83318  |
| H | -2.39314 | 0.68109  | 1.89701  |
| O | -1.63292 | 1.01544  | 4.37183  |
| O | -0.79557 | 2.03447  | -4.28057 |
| H | -0.76751 | 2.92662  | -3.91617 |



## 7.6 $F_{NN}$ -0.0050 au OH-AB-O<sup>-</sup> Trans Structure $S_0$ State

$$E_h = -722.8423$$

Cartesian Coordinates:

|   |          |          |          |
|---|----------|----------|----------|
| N | 0.03389  | 0.10257  | -0.68490 |
| N | 0.03599  | 0.10744  | 0.61231  |
| C | -0.74798 | -2.26311 | -0.53245 |
| C | -1.12998 | -3.42154 | -1.19810 |
| C | -1.14473 | -3.47099 | -2.59326 |
| C | -0.77184 | -2.34480 | -3.32202 |
| H | -0.09602 | -0.29890 | -3.21346 |
| H | -0.73716 | -2.22664 | 0.54965  |
| H | -1.42067 | -4.29917 | -0.62012 |
| H | -0.78452 | -2.38698 | -4.40816 |
| C | -0.38910 | -1.18399 | -2.65617 |
| C | -0.36446 | -1.10496 | -1.24798 |
| C | 0.40924  | 1.24024  | 1.24634  |
| C | 0.40431  | 1.22118  | 2.67770  |
| C | 0.80884  | 2.45676  | 0.60243  |
| C | 0.76303  | 2.30903  | 3.41964  |
| H | 0.10025  | 0.29574  | 3.16036  |
| C | 1.16946  | 3.55079  | 1.32866  |
| H | 0.81418  | 2.47631  | -0.48213 |
| C | 1.17412  | 3.56030  | 2.79410  |
| H | 0.75444  | 2.27972  | 4.50503  |
| H | 1.47356  | 4.47679  | 0.84607  |
| O | 1.50743  | 4.57118  | 3.44028  |
| O | -1.52340 | -4.61934 | -3.29167 |
| H | -1.74882 | -5.29969 | -2.64663 |

## 7.7 $F_{NN}$ -0.0050 au OH-AB-O<sup>-</sup> Rotation TS Structure $S_0$ State

$$E_h = -722.8024$$

Cartesian Coordinates:

|   |          |          |          |
|---|----------|----------|----------|
| N | 1.53256  | -0.45349 | -0.47936 |
| N | 1.50679  | -0.47872 | 0.85069  |
| C | 0.38736  | 1.69242  | -0.72967 |
| C | -0.07436 | 2.69271  | -1.57918 |
| C | 0.12120  | 2.62341  | -2.95629 |
| C | 0.79093  | 1.51824  | -3.48551 |
| H | 1.77942  | -0.34876 | -3.08461 |
| H | 0.22026  | 1.77406  | 0.33827  |
| H | -0.60109 | 3.54512  | -1.14659 |
| H | 0.94875  | 1.46256  | -4.56111 |
| C | 1.25425  | 0.50334  | -2.66175 |
| C | 1.07633  | 0.53922  | -1.23801 |
| C | 0.50008  | -1.08140 | 1.46204  |
| C | 0.55401  | -1.17128 | 2.90579  |
| C | -0.65113 | -1.65516 | 0.79577  |
| C | -0.44776 | -1.73079 | 3.62559  |
| H | 1.43068  | -0.74960 | 3.38891  |
| C | -1.65594 | -2.21852 | 1.50425  |
| H | -0.67251 | -1.60743 | -0.28731 |
| C | -1.63239 | -2.30067 | 2.97426  |
| H | -0.41521 | -1.78033 | 4.70939  |
| H | -2.53257 | -2.64063 | 1.02009  |
| O | -2.55771 | -2.82296 | 3.60540  |
| O | -0.34960 | 3.62046  | -3.83978 |
| H | -0.62126 | 4.37234  | -3.30145 |

## 7.8 $F_{NN}$ -0.0050 au OH-AB-O<sup>-</sup> Rotation Inversion TS Structure

### $S_0$ State

$$E_h = -722.7728$$

Cartesian Coordinates:

|   |          |          |          |
|---|----------|----------|----------|
| N | 0.26164  | 1.22688  | -1.29161 |
| N | 0.28003  | 1.22852  | -0.01134 |
| C | -0.64042 | -1.12091 | -1.29404 |
| C | -0.98044 | -2.25967 | -2.01957 |
| C | -0.74702 | -2.31737 | -3.39237 |
| C | -0.18382 | -1.21874 | -4.04088 |
| H | 0.57094  | 0.79173  | -3.80282 |
| H | -0.82999 | -1.07675 | -0.22885 |
| H | -1.43417 | -3.10906 | -1.50733 |
| H | 0.00219  | -1.27316 | -5.11099 |
| C | 0.13850  | -0.07766 | -3.31336 |
| C | -0.06579 | -0.00161 | -1.92342 |
| C | 0.34386  | 1.22262  | 1.29129  |
| C | 0.26337  | 0.01806  | 2.10842  |
| C | 0.51964  | 2.45849  | 2.04273  |
| C | 0.35100  | 0.03809  | 3.46400  |
| H | 0.15453  | -0.93233 | 1.59230  |
| C | 0.58823  | 2.49883  | 3.39849  |
| H | 0.58561  | 3.37261  | 1.45685  |
| C | 0.51165  | 1.28527  | 4.21600  |
| H | 0.30046  | -0.87481 | 4.05149  |
| H | 0.70878  | 3.43465  | 3.93763  |
| O | 0.57925  | 1.31016  | 5.45219  |
| O | -1.06793 | -3.44463 | -4.15294 |
| H | -1.36747 | -4.13360 | -3.54829 |

## 7.9 $F_{NN}$ -0.0050 au OH-AB-O<sup>-</sup> Inversion TS Structure $S_0$ State

$$E_h = -722.7729$$

Cartesian Coordinates:

|   |          |          |          |
|---|----------|----------|----------|
| N | 0.44488  | 1.27754  | -1.26379 |
| N | 0.43455  | 1.28459  | 0.01651  |
| C | -0.67570 | -0.97490 | -1.33600 |
| C | -1.09131 | -2.06852 | -2.09191 |
| C | -0.78530 | -2.14511 | -3.44906 |
| C | -0.07470 | -1.10827 | -4.05365 |
| H | 0.86576  | 0.81321  | -3.75406 |
| H | -0.92572 | -0.91844 | -0.28416 |
| H | -1.66048 | -2.86743 | -1.61500 |
| H | 0.16844  | -1.17873 | -5.11130 |
| C | 0.32013  | -0.00938 | -3.29795 |
| C | 0.04690  | 0.08193  | -1.92054 |
| C | 0.40684  | 1.17919  | 1.31861  |
| C | 0.58084  | 2.35883  | 2.15304  |
| C | 0.23628  | -0.06904 | 2.05361  |
| C | 0.55316  | 2.31804  | 3.51053  |
| H | 0.72363  | 3.30023  | 1.62777  |
| C | 0.23314  | -0.13131 | 3.41077  |
| H | 0.14106  | -0.98550 | 1.47725  |
| C | 0.37413  | 1.06429  | 4.24625  |
| H | 0.67002  | 3.21605  | 4.11104  |
| H | 0.11921  | -1.07517 | 3.93749  |
| O | 0.34650  | 1.01443  | 5.48328  |
| O | -1.17607 | -3.23053 | -4.23775 |
| H | -1.56292 | -3.89453 | -3.65512 |

## 7.10 $F_{NN}$ -0.0050 au OH-AB-O<sup>-</sup> Cis Structure $S_0$ State

$$E_h = -722.8107$$

Cartesian Coordinates:

|   |          |          |          |
|---|----------|----------|----------|
| N | 1.39816  | -1.67500 | -0.65852 |
| N | 1.41134  | -1.69361 | 0.63012  |
| C | 0.89599  | 0.68248  | -1.23828 |
| C | 0.41272  | 1.60157  | -2.15883 |
| C | -0.25414 | 1.17097  | -3.30876 |
| C | -0.40376 | -0.19044 | -3.54297 |
| H | -0.00470 | -2.17956 | -2.80886 |
| H | 1.38410  | 1.03403  | -0.33672 |
| H | 0.54360  | 2.66684  | -1.97051 |
| H | -0.93401 | -0.52214 | -4.43195 |
| C | 0.10518  | -1.11410 | -2.62936 |
| C | 0.74737  | -0.70856 | -1.44415 |
| C | 0.58415  | -0.99661 | 1.46210  |
| C | 1.00297  | -0.92560 | 2.83101  |
| C | -0.68888 | -0.41356 | 1.14949  |
| C | 0.31212  | -0.22046 | 3.77393  |
| H | 1.92995  | -1.43248 | 3.08597  |
| C | -1.41364 | 0.25677  | 2.09013  |
| H | -1.10795 | -0.54543 | 0.15926  |
| C | -0.93879 | 0.45860  | 3.45960  |
| H | 0.66699  | -0.15013 | 4.79780  |
| H | -2.39503 | 0.66233  | 1.85750  |
| O | -1.57823 | 1.13602  | 4.28463  |
| O | -0.77283 | 2.07658  | -4.24074 |
| H | -0.85214 | 2.93338  | -3.80568 |

## 7.11 $F_{NN}$ -0.0075 au OH-AB-O<sup>-</sup> Trans Structure $S_0$ State

$$E_h = -722.8420$$

Cartesian Coordinates:

|   |          |          |          |
|---|----------|----------|----------|
| N | 0.03497  | 0.10574  | -0.69086 |
| N | 0.03689  | 0.11031  | 0.61314  |
| C | -0.74585 | -2.25711 | -0.53455 |
| C | -1.12798 | -3.41585 | -1.19751 |
| C | -1.14430 | -3.46959 | -2.59294 |
| C | -0.77215 | -2.34522 | -3.32406 |
| H | -0.09564 | -0.29709 | -3.22139 |
| H | -0.73441 | -2.21917 | 0.54749  |
| H | -1.41779 | -4.29118 | -0.61536 |
| H | -0.78557 | -2.38931 | -4.41116 |
| C | -0.38841 | -1.18146 | -2.66180 |
| C | -0.36154 | -1.09616 | -1.25175 |
| C | 0.40796  | 1.23643  | 1.24704  |
| C | 0.40307  | 1.21792  | 2.68270  |
| C | 0.80835  | 2.45487  | 0.60100  |
| C | 0.76116  | 2.30382  | 3.42352  |
| H | 0.09911  | 0.29317  | 3.16606  |
| C | 1.16830  | 3.54685  | 1.32596  |
| H | 0.81299  | 2.47201  | -0.48359 |
| C | 1.17261  | 3.55570  | 2.79430  |
| H | 0.75298  | 2.27608  | 4.50867  |
| H | 1.47317  | 4.47484  | 0.84751  |
| O | 1.50595  | 4.56648  | 3.43309  |
| O | -1.52564 | -4.62592 | -3.28731 |
| H | -1.74816 | -5.29821 | -2.63269 |

## 7.12 $F_{NN}$ -0.0075 au OH-AB-O<sup>-</sup> Rotation TS Structure $S_0$ State

$$E_h = -722.8059$$

Cartesian Coordinates:

|   |          |          |          |
|---|----------|----------|----------|
| N | 1.52041  | -0.45623 | -0.48727 |
| N | 1.49766  | -0.48054 | 0.84845  |
| C | 0.37177  | 1.68969  | -0.73666 |
| C | -0.08137 | 2.69238  | -1.58412 |
| C | 0.12131  | 2.62786  | -2.96245 |
| C | 0.78927  | 1.52276  | -3.49176 |
| H | 1.77279  | -0.35011 | -3.09135 |
| H | 0.20368  | 1.77156  | 0.33113  |
| H | -0.60599 | 3.54545  | -1.15002 |
| H | 0.95667  | 1.47163  | -4.56730 |
| C | 1.24436  | 0.50097  | -2.66939 |
| C | 1.06285  | 0.53221  | -1.24319 |
| C | 0.49784  | -1.08093 | 1.46456  |
| C | 0.55174  | -1.16406 | 2.91235  |
| C | -0.65182 | -1.66560 | 0.79959  |
| C | -0.44584 | -1.72530 | 3.63419  |
| H | 1.42444  | -0.73456 | 3.39525  |
| C | -1.65062 | -2.23248 | 1.50969  |
| H | -0.67242 | -1.62323 | -0.28377 |
| C | -1.62626 | -2.30766 | 2.98289  |
| H | -0.41427 | -1.76917 | 4.71808  |
| H | -2.52439 | -2.66639 | 1.03062  |
| O | -2.54722 | -2.83656 | 3.60867  |
| O | -0.34291 | 3.63941  | -3.84244 |
| H | -0.56057 | 4.40305  | -3.29593 |

### 7.13 $F_{NN}$ -0.0075 au OH-AB-OH Rotation Inversion TS Structure $S_0$ State

$$E_h = -722.7725$$

Cartesian Coordinates:

|   |          |          |          |
|---|----------|----------|----------|
| N | 0.29429  | 1.21995  | -1.29807 |
| N | 0.30380  | 1.22402  | -0.01074 |
| C | -0.62359 | -1.11650 | -1.29169 |
| C | -0.98116 | -2.25051 | -2.01436 |
| C | -0.76479 | -2.31088 | -3.39004 |
| C | -0.19856 | -1.21690 | -4.04365 |
| H | 0.57970  | 0.78723  | -3.81411 |
| H | -0.79992 | -1.07299 | -0.22436 |
| H | -1.43526 | -3.09574 | -1.49505 |
| H | -0.02028 | -1.27304 | -5.11624 |
| C | 0.14239  | -0.07792 | -3.32012 |
| C | -0.04530 | 0.00357  | -1.92546 |
| C | 0.35847  | 1.21983  | 1.28680  |
| C | 0.28519  | 0.00962  | 2.10619  |
| C | 0.51310  | 2.46109  | 2.04392  |
| C | 0.35812  | 0.02925  | 3.45950  |
| H | 0.19534  | -0.94173 | 1.58797  |
| C | 0.56620  | 2.50121  | 3.39746  |
| H | 0.57347  | 3.37638  | 1.45919  |
| C | 0.49503  | 1.28214  | 4.21380  |
| H | 0.31379  | -0.88213 | 4.04936  |
| H | 0.66904  | 3.43542  | 3.94245  |
| O | 0.54845  | 1.30702  | 5.44515  |
| O | -1.10705 | -3.44218 | -4.14662 |
| H | -1.37784 | -4.13059 | -3.52770 |



## 7.14 $F_{NN}$ -0.0075 au OH-AB-O<sup>-</sup> Inversion TS Structure $S_0$ State

$$E_h = -722.7725$$

Cartesian Coordinates:

|   |          |          |          |
|---|----------|----------|----------|
| N | 0.48667  | 1.26429  | -1.26914 |
| N | 0.46709  | 1.27496  | 0.01824  |
| C | -0.64890 | -0.97563 | -1.33014 |
| C | -1.08685 | -2.06055 | -2.08417 |
| C | -0.80730 | -2.13473 | -3.44734 |
| C | -0.09736 | -1.10144 | -4.05896 |
| H | 0.86919  | 0.80995  | -3.76813 |
| H | -0.87878 | -0.92432 | -0.27368 |
| H | -1.65296 | -2.85659 | -1.59825 |
| H | 0.13178  | -1.17048 | -5.12111 |
| C | 0.32124  | -0.00868 | -3.30626 |
| C | 0.07368  | 0.08341  | -1.92105 |
| C | 0.42810  | 1.17397  | 1.31454  |
| C | 0.57696  | 2.36074  | 2.15296  |
| C | 0.26434  | -0.07977 | 2.05302  |
| C | 0.52593  | 2.32243  | 3.50691  |
| H | 0.71762  | 3.30269  | 1.62815  |
| C | 0.23865  | -0.13953 | 3.40689  |
| H | 0.19530  | -0.99876 | 1.47676  |
| C | 0.34577  | 1.06432  | 4.24199  |
| H | 0.62165  | 3.22006  | 4.11118  |
| H | 0.13097  | -1.08158 | 3.93756  |
| O | 0.29068  | 1.01721  | 5.47266  |
| O | -1.22513 | -3.22037 | -4.23306 |
| H | -1.57510 | -3.89013 | -3.63371 |

### 7.15 $F_{NN}$ -0.0075 au OH-AB-O<sup>-</sup> Cis Structure $S_0$ State

$$E_h = -722.8091$$

Cartesian Coordinates:

|   |          |          |          |
|---|----------|----------|----------|
| N | 1.37070  | -1.70641 | -0.66397 |
| N | 1.38925  | -1.73228 | 0.63170  |
| C | 0.85861  | 0.66189  | -1.20034 |
| C | 0.39494  | 1.59406  | -2.11576 |
| C | -0.23496 | 1.18255  | -3.29439 |
| C | -0.36372 | -0.17444 | -3.56086 |
| H | 0.03073  | -2.17698 | -2.85485 |
| H | 1.31425  | 1.00147  | -0.27775 |
| H | 0.50864  | 2.65607  | -1.89938 |
| H | -0.87429 | -0.49355 | -4.46702 |
| C | 0.12909  | -1.11405 | -2.65317 |
| C | 0.73431  | -0.73136 | -1.43753 |
| C | 0.57686  | -1.02818 | 1.46014  |
| C | 1.00382  | -0.93144 | 2.82949  |
| C | -0.70128 | -0.45157 | 1.14245  |
| C | 0.33260  | -0.18625 | 3.75221  |
| H | 1.92417  | -1.44464 | 3.09433  |
| C | -1.40867 | 0.25614  | 2.06434  |
| H | -1.13368 | -0.62595 | 0.16422  |
| C | -0.90691 | 0.51063  | 3.41891  |
| H | 0.69260  | -0.08889 | 4.77169  |
| H | -2.39435 | 0.65393  | 1.83714  |
| O | -1.51774 | 1.24166  | 4.21243  |
| O | -0.74534 | 2.11351  | -4.21688 |
| H | -0.92909 | 2.92598  | -3.73094 |

## 7.16 $F_{NN}$ -0.0100 au OH-AB-O<sup>-</sup> Trans Structure $S_0$ State

$$E_h = -722.8439$$

Cartesian Coordinates:

|   |          |          |          |
|---|----------|----------|----------|
| N | 0.03630  | 0.10967  | -0.69894 |
| N | 0.03807  | 0.11397  | 0.61244  |
| C | -0.74338 | -2.24990 | -0.53742 |
| C | -1.12578 | -3.40942 | -1.19623 |
| C | -1.14417 | -3.46907 | -2.59224 |
| C | -0.77293 | -2.34717 | -3.32690 |
| H | -0.09565 | -0.29664 | -3.23309 |
| H | -0.73103 | -2.20947 | 0.54454  |
| H | -1.41453 | -4.28174 | -0.60879 |
| H | -0.78743 | -2.39437 | -4.41508 |
| C | -0.38786 | -1.17948 | -2.66966 |
| C | -0.35831 | -1.08637 | -1.25748 |
| C | 0.40694  | 1.23336  | 1.24705  |
| C | 0.40175  | 1.21426  | 2.68705  |
| C | 0.80829  | 2.45443  | 0.59992  |
| C | 0.75904  | 2.29771  | 3.42794  |
| H | 0.09779  | 0.28979  | 3.17031  |
| C | 1.16736  | 3.54367  | 1.32489  |
| H | 0.81255  | 2.47020  | -0.48470 |
| C | 1.17097  | 3.55061  | 2.79623  |
| H | 0.75100  | 2.27067  | 4.51293  |
| H | 1.47306  | 4.47399  | 0.85125  |
| O | 1.50419  | 4.56099  | 3.42846  |
| O | -1.52841 | -4.63417 | -3.28094 |
| H | -1.74774 | -5.29756 | -2.61601 |

## 7.17 $F_{NN}$ -0.0100 au OH-AB-O<sup>-</sup> Rotation TS Structure $S_0$ State

$$E_h = -722.8116$$

Cartesian Coordinates:

|   |          |          |          |
|---|----------|----------|----------|
| N | 1.50536  | -0.45969 | -0.49680 |
| N | 1.48614  | -0.48258 | 0.84447  |
| C | 0.35117  | 1.68516  | -0.74581 |
| C | -0.09118 | 2.69134  | -1.59099 |
| C | 0.12316  | 2.63376  | -2.97020 |
| C | 0.79170  | 1.52983  | -3.49934 |
| H | 1.77007  | -0.34897 | -3.09921 |
| H | 0.17868  | 1.76531  | 0.32146  |
| H | -0.61510 | 3.54435  | -1.15570 |
| H | 0.97345  | 1.48591  | -4.57419 |
| C | 1.23552  | 0.49961  | -2.67875 |
| C | 1.04651  | 0.52456  | -1.25030 |
| C | 0.49329  | -1.08001 | 1.46699  |
| C | 0.54982  | -1.15689 | 2.91855  |
| C | -0.65591 | -1.67535 | 0.80537  |
| C | -0.44163 | -1.72141 | 3.64427  |
| H | 1.41916  | -0.71930 | 3.39981  |
| C | -1.64698 | -2.24681 | 1.51908  |
| H | -0.67844 | -1.63733 | -0.27822 |
| C | -1.61845 | -2.31691 | 2.99527  |
| H | -0.40864 | -1.76047 | 4.72825  |
| H | -2.51874 | -2.69203 | 1.04651  |
| O | -2.53316 | -2.85412 | 3.61738  |
| O | -0.32867 | 3.66253  | -3.84603 |
| H | -0.49603 | 4.43365  | -3.29204 |

**7.18  $F_{NN}$  -0.0100 au OH-AB-O<sup>-</sup> Rotation Inversion TS Structure  $S_0$  State**

$E_h = -722.7754$

Cartesian Coordinates:

|   |          |          |          |
|---|----------|----------|----------|
| N | 0.34436  | 1.20794  | -1.30434 |
| N | 0.34065  | 1.21601  | -0.01070 |
| C | -0.60236 | -1.11186 | -1.28859 |
| C | -0.98641 | -2.23773 | -2.00832 |
| C | -0.78991 | -2.30146 | -3.38740 |
| C | -0.21095 | -1.21690 | -4.04610 |
| H | 0.60682  | 0.77350  | -3.82661 |
| H | -0.76450 | -1.06853 | -0.21906 |
| H | -1.44656 | -3.07545 | -1.48164 |
| H | -0.04128 | -1.27538 | -5.12168 |
| C | 0.15834  | -0.08353 | -3.32687 |
| C | -0.01278 | 0.00498  | -1.92751 |
| C | 0.38166  | 1.21484  | 1.28251  |
| C | 0.32761  | -0.00116 | 2.10410  |
| C | 0.49570  | 2.46355  | 2.04396  |
| C | 0.37710  | 0.02034  | 3.45571  |
| H | 0.27346  | -0.95427 | 1.58396  |
| C | 0.52359  | 2.50491  | 3.39560  |
| H | 0.54350  | 3.37982  | 1.45966  |
| C | 0.46662  | 1.28069  | 4.21167  |
| H | 0.34799  | -0.88944 | 4.04858  |
| H | 0.59392  | 3.43901  | 3.94545  |
| O | 0.49402  | 1.30721  | 5.43875  |
| O | -1.16396 | -3.43320 | -4.13956 |
| H | -1.41397 | -4.11825 | -3.50797 |

## 7.19 $F_{NN}$ -0.0100 au OH-AB-O<sup>-</sup> Inversion TS Structure $S_0$ State

$$E_h = -722.7753$$

Cartesian Coordinates:

|   |          |          |          |
|---|----------|----------|----------|
| N | 0.54413  | 1.24458  | -1.27341 |
| N | 0.51205  | 1.26054  | 0.02001  |
| C | -0.61704 | -0.97745 | -1.32263 |
| C | -1.08643 | -2.04884 | -2.07501 |
| C | -0.83854 | -2.11932 | -3.44511 |
| C | -0.12125 | -1.09480 | -4.06365 |
| H | 0.88609  | 0.79773  | -3.78259 |
| H | -0.82348 | -0.93218 | -0.26112 |
| H | -1.65341 | -2.83900 | -1.57994 |
| H | 0.09137  | -1.16205 | -5.13108 |
| C | 0.33104  | -0.01310 | -3.31384 |
| C | 0.11073  | 0.08019  | -1.92086 |
| C | 0.45802  | 1.16570  | 1.31106  |
| C | 0.56258  | 2.36255  | 2.15058  |
| C | 0.31504  | -0.09408 | 2.05399  |
| C | 0.47980  | 2.32823  | 3.50039  |
| H | 0.69357  | 3.30540  | 1.62497  |
| C | 0.25902  | -0.14904 | 3.40436  |
| H | 0.28905  | -1.01650 | 1.47934  |
| C | 0.30815  | 1.06529  | 4.23629  |
| H | 0.53992  | 3.22750  | 4.10643  |
| H | 0.16765  | -1.08944 | 3.94057  |
| O | 0.21386  | 1.02236  | 5.45959  |
| O | -1.29395 | -3.20031 | -4.22785 |
| H | -1.61472 | -3.87247 | -3.61463 |

## 7.20 $F_{NN}$ -0.0100 au OH-AB-O<sup>-</sup> Cis Structure $S_0$ State

$$E_h = -722.8103$$

Cartesian Coordinates:

|   |          |          |          |
|---|----------|----------|----------|
| N | 1.33965  | -1.72792 | -0.66916 |
| N | 1.36388  | -1.75747 | 0.63427  |
| C | 0.81359  | 0.64900  | -1.17215 |
| C | 0.37418  | 1.58923  | -2.08938 |
| C | -0.21126 | 1.19142  | -3.29692 |
| C | -0.31886 | -0.16246 | -3.58684 |
| H | 0.07020  | -2.17389 | -2.89789 |
| H | 1.23358  | 0.98172  | -0.23065 |
| H | 0.46991  | 2.64846  | -1.85141 |
| H | -0.80537 | -0.47378 | -4.51025 |
| C | 0.15413  | -1.11280 | -2.67882 |
| C | 0.71730  | -0.74763 | -1.43302 |
| C | 0.56937  | -1.04747 | 1.46270  |
| C | 1.00353  | -0.94257 | 2.83428  |
| C | -0.71307 | -0.47039 | 1.14672  |
| C | 0.35214  | -0.17034 | 3.74539  |
| H | 1.91562  | -1.46749 | 3.10336  |
| C | -1.40250 | 0.26248  | 2.05808  |
| H | -1.15787 | -0.67191 | 0.17896  |
| C | -0.87465 | 0.54903  | 3.40023  |
| H | 0.71626  | -0.06053 | 4.76193  |
| H | -2.39103 | 0.65861  | 1.84116  |
| O | -1.45594 | 1.32190  | 4.16902  |
| O | -0.71366 | 2.14195  | -4.21534 |
| H | -0.99857 | 2.90477  | -3.69807 |

## 7.21 $F_{NN} + 0.0025$ au OH-AB-O<sup>-</sup> Trans Structure $S_0$ State

$$E_h = -722.8555$$

Cartesian Coordinates:

|   |          |          |          |
|---|----------|----------|----------|
| N | 0.03134  | 0.09549  | -0.67377 |
| N | 0.03369  | 0.09992  | 0.60610  |
| C | -0.75317 | -2.27643 | -0.52893 |
| C | -1.13512 | -3.43515 | -1.19729 |
| C | -1.14682 | -3.47788 | -2.59339 |
| C | -0.77230 | -2.34876 | -3.31943 |
| H | -0.09818 | -0.30879 | -3.20493 |
| H | -0.74326 | -2.24065 | 0.55342  |
| H | -1.42786 | -4.31712 | -0.62733 |
| H | -0.78413 | -2.39007 | -4.40356 |
| C | -0.39138 | -1.19292 | -2.64842 |
| C | -0.37158 | -1.12626 | -1.24380 |
| C | 0.41357  | 1.25312  | 1.24229  |
| C | 0.40785  | 1.22943  | 2.66150  |
| C | 0.81147  | 2.46664  | 0.60761  |
| C | 0.76804  | 2.32190  | 3.41049  |
| H | 0.10335  | 0.30071  | 3.13992  |
| C | 1.17333  | 3.56464  | 1.34169  |
| H | 0.81969  | 2.49642  | -0.47699 |
| C | 1.17811  | 3.57274  | 2.79971  |
| H | 0.75776  | 2.28561  | 4.49741  |
| H | 1.47527  | 4.48576  | 0.84883  |
| O | 1.51110  | 4.58311  | 3.47099  |
| O | -1.51869 | -4.60620 | -3.29788 |
| H | -1.75201 | -5.30732 | -2.67872 |



## 7.22 $F_{NN} + 0.0025$ au OH-AB-O<sup>-</sup> Rotation TS Structure $S_0$ State

$$E_h = -722.8043$$

Cartesian Coordinates:

|   |          |          |          |
|---|----------|----------|----------|
| N | 1.55536  | -0.45259 | -0.46787 |
| N | 1.52638  | -0.48098 | 0.84639  |
| C | 0.41188  | 1.69007  | -0.71627 |
| C | -0.06107 | 2.69142  | -1.56817 |
| C | 0.13934  | 2.62263  | -2.94100 |
| C | 0.82619  | 1.52395  | -3.47179 |
| H | 1.82719  | -0.32772 | -3.07202 |
| H | 0.22795  | 1.75604  | 0.34996  |
| H | -0.60083 | 3.53765  | -1.14104 |
| H | 0.97784  | 1.47075  | -4.54587 |
| C | 1.29856  | 0.52009  | -2.64790 |
| C | 1.10699  | 0.55631  | -1.23194 |
| C | 0.49789  | -1.08327 | 1.45221  |
| C | 0.56609  | -1.20067 | 2.88269  |
| C | -0.66701 | -1.61699 | 0.79340  |
| C | -0.44198 | -1.75735 | 3.60552  |
| H | 1.46097  | -0.80856 | 3.35945  |
| C | -1.68448 | -2.16958 | 1.50865  |
| H | -0.70516 | -1.54815 | -0.28824 |
| C | -1.64768 | -2.28253 | 2.96712  |
| H | -0.39332 | -1.83064 | 4.68889  |
| H | -2.57635 | -2.54823 | 1.01671  |
| O | -2.58164 | -2.78460 | 3.62467  |
| O | -0.31670 | 3.59587  | -3.82908 |
| H | -0.85531 | 4.23123  | -3.34465 |

## 7.23 $F_{NN} + 0.0025$ au OH-AB-O<sup>-</sup> Rotation Inversion TS Structure $S_0$ State

$$E_h = -722.7914$$

Cartesian Coordinates:

|   |          |          |          |
|---|----------|----------|----------|
| N | 0.22304  | 1.22694  | -1.27635 |
| N | 0.25102  | 1.22736  | -0.01318 |
| C | -0.67677 | -1.13591 | -1.29967 |
| C | -0.99564 | -2.27643 | -2.03522 |
| C | -0.72470 | -2.32806 | -3.40298 |
| C | -0.14651 | -1.22719 | -4.03633 |
| H | 0.58519  | 0.78285  | -3.77800 |
| H | -0.89892 | -1.08989 | -0.24004 |
| H | -1.46461 | -3.12872 | -1.54340 |
| H | 0.05398  | -1.27747 | -5.10169 |
| C | 0.15229  | -0.08954 | -3.29748 |
| C | -0.09000 | -0.02652 | -1.91728 |
| C | 0.32796  | 1.22076  | 1.30667  |
| C | 0.26727  | 0.03165  | 2.11986  |
| C | 0.50669  | 2.45027  | 2.04011  |
| C | 0.37940  | 0.06270  | 3.48448  |
| H | 0.15406  | -0.92161 | 1.61036  |
| C | 0.59426  | 2.49888  | 3.40441  |
| H | 0.56316  | 3.36110  | 1.44849  |
| C | 0.53847  | 1.30215  | 4.22894  |
| H | 0.34573  | -0.85533 | 4.06749  |
| H | 0.71939  | 3.44680  | 3.92364  |
| O | 0.62210  | 1.33477  | 5.48330  |
| O | -1.01430 | -3.43459 | -4.17580 |
| H | -1.42992 | -4.10936 | -3.62673 |

## 7.24 $F_{NN} + 0.0025$ au OH-AB-O<sup>-</sup> Inversion TS Structure $S_0$ State

$$E_h = -722.7921$$

Cartesian Coordinates:

|   |          |          |          |
|---|----------|----------|----------|
| N | 0.39230  | 1.28443  | -1.24950 |
| N | 0.39220  | 1.28889  | 0.01370  |
| C | -0.72458 | -0.98372 | -1.34782 |
| C | -1.10998 | -2.08425 | -2.11276 |
| C | -0.75362 | -2.16216 | -3.45924 |
| C | -0.02487 | -1.12534 | -4.04394 |
| H | 0.88404  | 0.80130  | -3.72322 |
| H | -1.01669 | -0.91858 | -0.30639 |
| H | -1.69724 | -2.88331 | -1.66043 |
| H | 0.23980  | -1.19457 | -5.09412 |
| C | 0.33693  | -0.02460 | -3.27821 |
| C | 0.01270  | 0.06077  | -1.91610 |
| C | 0.37749  | 1.17898  | 1.33430  |
| C | 0.56133  | 2.35254  | 2.14963  |
| C | 0.22631  | -0.05402 | 2.06753  |
| C | 0.56702  | 2.31676  | 3.51751  |
| H | 0.68918  | 3.29190  | 1.61717  |
| C | 0.26218  | -0.10883 | 3.43571  |
| H | 0.11172  | -0.97180 | 1.49713  |
| C | 0.42082  | 1.07715  | 4.26291  |
| H | 0.69553  | 3.22702  | 4.09941  |
| H | 0.16406  | -1.05819 | 3.95816  |
| O | 0.43334  | 1.03190  | 5.51980  |
| O | -1.10115 | -3.23218 | -4.25869 |
| H | -1.62557 | -3.85861 | -3.74668 |

## 7.25 $F_{NN} + 0.0025$ au OH-AB-O<sup>-</sup> Cis Structure $S_0$ State

$$E_h = -722.8316$$

Cartesian Coordinates:

|   |          |          |          |
|---|----------|----------|----------|
| N | 1.44657  | -1.55129 | -0.64078 |
| N | 1.45115  | -1.54428 | 0.63005  |
| C | 0.94286  | 0.76965  | -1.35586 |
| C | 0.43214  | 1.63556  | -2.31873 |
| C | -0.28905 | 1.13710  | -3.40521 |
| C | -0.48190 | -0.23711 | -3.52928 |
| H | -0.06735 | -2.17239 | -2.68981 |
| H | 1.49692  | 1.16953  | -0.51367 |
| H | 0.59949  | 2.70732  | -2.22296 |
| H | -1.03035 | -0.61740 | -4.38485 |
| C | 0.04934  | -1.09935 | -2.57578 |
| C | 0.75163  | -0.61699 | -1.46024 |
| C | 0.59626  | -0.87266 | 1.49190  |
| C | 0.99440  | -0.93743 | 2.85582  |
| C | -0.65971 | -0.24965 | 1.22541  |
| C | 0.25919  | -0.38215 | 3.87288  |
| H | 1.92995  | -1.45211 | 3.06241  |
| C | -1.42191 | 0.28031  | 2.23720  |
| H | -1.04248 | -0.21625 | 0.21312  |
| C | -1.01036 | 0.27389  | 3.63269  |
| H | 0.60049  | -0.43907 | 4.90421  |
| H | -2.38792 | 0.72790  | 2.01597  |
| O | -1.70896 | 0.77757  | 4.55174  |
| O | -0.82094 | 1.95234  | -4.38297 |
| H | -0.57893 | 2.86886  | -4.20705 |

## 7.26 $F_{NN} + 0.0050$ au OH-AB-O<sup>-</sup> Trans Structure $S_0$ State

$$E_h = -722.8640$$

Cartesian Coordinates:

|   |          |          |          |
|---|----------|----------|----------|
| N | 0.03063  | 0.09364  | -0.67165 |
| N | 0.03294  | 0.09735  | 0.60362  |
| C | -0.75457 | -2.27953 | -0.52842 |
| C | -1.13656 | -3.43857 | -1.19637 |
| C | -1.14766 | -3.48072 | -2.59330 |
| C | -0.77270 | -2.35116 | -3.31954 |
| H | -0.09906 | -0.31299 | -3.20614 |
| H | -0.74478 | -2.24314 | 0.55404  |
| H | -1.42983 | -4.32130 | -0.62784 |
| H | -0.78458 | -2.39343 | -4.40327 |
| C | -0.39208 | -1.19599 | -2.64824 |
| C | -0.37340 | -1.13162 | -1.24412 |
| C | 0.41505  | 1.25742  | 1.24063  |
| C | 0.40898  | 1.23169  | 2.65619  |
| C | 0.81250  | 2.47062  | 0.60941  |
| C | 0.76958  | 2.32549  | 3.40823  |
| H | 0.10436  | 0.30168  | 3.13285  |
| C | 1.17460  | 3.56947  | 1.34695  |
| H | 0.82176  | 2.50430  | -0.47523 |
| C | 1.17930  | 3.57637  | 2.80291  |
| H | 0.75873  | 2.28664  | 4.49592  |
| H | 1.47581  | 4.48921  | 0.85109  |
| O | 1.51208  | 4.58661  | 3.48301  |
| O | -1.51762 | -4.60352 | -3.29833 |
| H | -1.75340 | -5.31056 | -2.68690 |

## 7.27 $F_{NN} + 0.0050$ au OH-AB-O<sup>-</sup> Rotation TS Structure $S_0$ State

$$E_h = -722.8095$$

Cartesian Coordinates:

|   |          |          |          |
|---|----------|----------|----------|
| N | 1.55541  | -0.45164 | -0.46907 |
| N | 1.52717  | -0.48079 | 0.84109  |
| C | 0.40511  | 1.68652  | -0.71663 |
| C | -0.07242 | 2.68622  | -1.56978 |
| C | 0.14300  | 2.62372  | -2.94056 |
| C | 0.84274  | 1.53074  | -3.47106 |
| H | 1.84750  | -0.31590 | -3.07003 |
| H | 0.20970  | 1.74368  | 0.34802  |
| H | -0.62713 | 3.52458  | -1.14689 |
| H | 1.00237  | 1.48451  | -4.54377 |
| C | 1.31176  | 0.52775  | -2.64750 |
| C | 1.10783  | 0.56110  | -1.23394 |
| C | 0.49389  | -1.08341 | 1.44918  |
| C | 0.57125  | -1.20947 | 2.87529  |
| C | -0.67590 | -1.60827 | 0.79769  |
| C | -0.43548 | -1.76795 | 3.60278  |
| H | 1.47246  | -0.82529 | 3.34742  |
| C | -1.69404 | -2.15977 | 1.52013  |
| H | -0.72410 | -1.53463 | -0.28335 |
| C | -1.64856 | -2.28194 | 2.97413  |
| H | -0.37731 | -1.84894 | 4.68598  |
| H | -2.59063 | -2.52733 | 1.02835  |
| O | -2.58243 | -2.77919 | 3.64505  |
| O | -0.30653 | 3.58913  | -3.82995 |
| H | -0.86453 | 4.22073  | -3.36276 |

## 7.28 $F_{NN} + 0.0050$ au OH-AB-O<sup>-</sup> Rotation Inversion TS Structure $S_0$ State

$$E_h = -722.8032$$

Cartesian Coordinates:

|   |          |          |          |
|---|----------|----------|----------|
| N | 0.24296  | 1.21640  | -1.27391 |
| N | 0.26328  | 1.21980  | -0.01402 |
| C | -0.67782 | -1.14216 | -1.30034 |
| C | -1.00467 | -2.27803 | -2.03990 |
| C | -0.73088 | -2.32788 | -3.40834 |
| C | -0.14108 | -1.23020 | -4.03780 |
| H | 0.60322  | 0.77196  | -3.77446 |
| H | -0.90420 | -1.09629 | -0.24131 |
| H | -1.48339 | -3.12781 | -1.55360 |
| H | 0.05718  | -1.27873 | -5.10326 |
| C | 0.16519  | -0.09807 | -3.29510 |
| C | -0.08002 | -0.03869 | -1.91523 |
| C | 0.33358  | 1.21563  | 1.31170  |
| C | 0.29005  | 0.03193  | 2.12600  |
| C | 0.49151  | 2.44691  | 2.03952  |
| C | 0.40297  | 0.07097  | 3.49444  |
| H | 0.19289  | -0.92468 | 1.61953  |
| C | 0.57201  | 2.50171  | 3.40752  |
| H | 0.53745  | 3.35634  | 1.44501  |
| C | 0.53632  | 1.31117  | 4.23580  |
| H | 0.38675  | -0.84833 | 4.07724  |
| H | 0.68000  | 3.45637  | 3.91940  |
| O | 0.61627  | 1.34969  | 5.49774  |
| O | -1.02457 | -3.42391 | -4.18527 |
| H | -1.48237 | -4.08850 | -3.65779 |

## 7.29 $F_{NN} + 0.0050$ au OH-AB-O<sup>-</sup> Inversion TS Structure $S_0$ State

$$E_h = -722.8042$$

Cartesian Coordinates:

|   |          |          |          |
|---|----------|----------|----------|
| N | 0.41205  | 1.27136  | -1.24605 |
| N | 0.40462  | 1.27888  | 0.01365  |
| C | -0.72442 | -0.99121 | -1.34856 |
| C | -1.11700 | -2.08610 | -2.11823 |
| C | -0.75926 | -2.16135 | -3.46573 |
| C | -0.02113 | -1.12791 | -4.04604 |
| H | 0.89740  | 0.79052  | -3.71949 |
| H | -1.01955 | -0.92655 | -0.30763 |
| H | -1.71226 | -2.88227 | -1.67186 |
| H | 0.23945  | -1.19389 | -5.09705 |
| C | 0.34727  | -0.03361 | -3.27579 |
| C | 0.02150  | 0.04719  | -1.91376 |
| C | 0.38082  | 1.17190  | 1.34011  |
| C | 0.54393  | 2.34934  | 2.14743  |
| C | 0.24708  | -0.05568 | 2.07690  |
| C | 0.54502  | 2.32080  | 3.51898  |
| H | 0.66002  | 3.28753  | 1.61036  |
| C | 0.28648  | -0.10168 | 3.44949  |
| H | 0.14608  | -0.97794 | 1.51118  |
| C | 0.42236  | 1.08675  | 4.27095  |
| H | 0.65718  | 3.23937  | 4.09225  |
| H | 0.20612  | -1.05250 | 3.97341  |
| O | 0.43623  | 1.04845  | 5.53557  |
| O | -1.10925 | -3.22032 | -4.26973 |
| H | -1.67749 | -3.82959 | -3.78448 |



### 7.30 $F_{NN} + 0.0050$ au OH-AB-O<sup>-</sup> Cis Structure $S_0$ State

$$E_h = -722.8439$$

Cartesian Coordinates:

|   |          |          |          |
|---|----------|----------|----------|
| N | 1.43793  | -1.52086 | -0.63764 |
| N | 1.44395  | -1.50646 | 0.62858  |
| C | 0.92288  | 0.79464  | -1.37608 |
| C | 0.42061  | 1.64613  | -2.35765 |
| C | -0.28683 | 1.13001  | -3.44535 |
| C | -0.47776 | -0.24752 | -3.54977 |
| H | -0.05579 | -2.16842 | -2.68763 |
| H | 1.47533  | 1.20787  | -0.53906 |
| H | 0.58910  | 2.71879  | -2.28006 |
| H | -1.00797 | -0.64048 | -4.41067 |
| C | 0.04680  | -1.09342 | -2.58022 |
| C | 0.73513  | -0.59179 | -1.46437 |
| C | 0.59051  | -0.83667 | 1.50574  |
| C | 0.99257  | -0.94317 | 2.86255  |
| C | -0.66207 | -0.20218 | 1.26433  |
| C | 0.25593  | -0.42741 | 3.90268  |
| H | 1.92880  | -1.46500 | 3.04802  |
| C | -1.42439 | 0.28985  | 2.29945  |
| H | -1.04276 | -0.12432 | 0.25352  |
| C | -1.01617 | 0.22744  | 3.69197  |
| H | 0.60149  | -0.52264 | 4.93073  |
| H | -2.38798 | 0.74913  | 2.09140  |
| O | -1.71843 | 0.68846  | 4.63823  |
| O | -0.80944 | 1.92082  | -4.44029 |
| H | -0.50092 | 2.82909  | -4.34218 |

### 7.31 $F_{NN} + 0.0075$ au OH-AB-O<sup>-</sup> Trans Structure $S_0$ State

$$E_h = -722.8744$$

Cartesian Coordinates:

|   |          |          |          |
|---|----------|----------|----------|
| N | 0.03008  | 0.09212  | -0.67125 |
| N | 0.03237  | 0.09539  | 0.60021  |
| C | -0.75563 | -2.28180 | -0.52830 |
| C | -1.13774 | -3.44139 | -1.19499 |
| C | -1.14870 | -3.48408 | -2.59294 |
| C | -0.77346 | -2.35447 | -3.32019 |
| H | -0.10032 | -0.31803 | -3.20984 |
| H | -0.74573 | -2.24427 | 0.55427  |
| H | -1.43138 | -4.32448 | -0.62707 |
| H | -0.78570 | -2.39843 | -4.40364 |
| C | -0.39296 | -1.19940 | -2.64956 |
| C | -0.37488 | -1.13602 | -1.24557 |
| C | 0.41662  | 1.26200  | 1.23834  |
| C | 0.40998  | 1.23373  | 2.65055  |
| C | 0.81389  | 2.47553  | 0.61134  |
| C | 0.77085  | 2.32844  | 3.40640  |
| H | 0.10512  | 0.30220  | 3.12490  |
| C | 1.17606  | 3.57470  | 1.35314  |
| H | 0.82444  | 2.51367  | -0.47334 |
| C | 1.18034  | 3.57962  | 2.80726  |
| H | 0.75925  | 2.28660  | 4.49497  |
| H | 1.47669  | 4.49334  | 0.85486  |
| O | 1.51284  | 4.58949  | 3.49673  |
| O | -1.51697 | -4.60204 | -3.29754 |
| H | -1.75498 | -5.31446 | -2.69324 |

### 7.32 $F_{NN} + 0.0075$ au OH-AB-O<sup>-</sup> Rotation TS Structure $S_0$ State

$$E_h = -722.8173$$

Cartesian Coordinates:

|   |          |          |          |
|---|----------|----------|----------|
| N | 1.55118  | -0.44862 | -0.47262 |
| N | 1.52328  | -0.47894 | 0.83518  |
| C | 0.39473  | 1.68626  | -0.71965 |
| C | -0.08475 | 2.68391  | -1.57452 |
| C | 0.14927  | 2.62782  | -2.94351 |
| C | 0.86050  | 1.53908  | -3.47284 |
| H | 1.86379  | -0.30505 | -3.06880 |
| H | 0.18710  | 1.73427  | 0.34309  |
| H | -0.65559 | 3.51438  | -1.15834 |
| H | 1.03022  | 1.50009  | -4.54387 |
| C | 1.32194  | 0.53560  | -2.64895 |
| C | 1.10390  | 0.56668  | -1.23743 |
| C | 0.48738  | -1.08231 | 1.44684  |
| C | 0.57495  | -1.21713 | 2.86909  |
| C | -0.68697 | -1.60314 | 0.80492  |
| C | -0.42816 | -1.78028 | 3.60250  |
| H | 1.48185  | -0.83864 | 3.33598  |
| C | -1.70293 | -2.15668 | 1.53667  |
| H | -0.74732 | -1.52684 | -0.27549 |
| C | -1.64764 | -2.28688 | 2.98597  |
| H | -0.35823 | -1.86903 | 4.68554  |
| H | -2.60279 | -2.51757 | 1.04563  |
| O | -2.57960 | -2.78210 | 3.67200  |
| O | -0.29008 | 3.58579  | -3.83410 |
| H | -0.85492 | 4.22347  | -3.38347 |

### 7.33 $F_{NN} + 0.0075$ au OH-AB-O<sup>-</sup> Rotation Inversion TS Structure $S_0$ State

$$E_h = -722.8178$$

Cartesian Coordinates:

|   |          |          |          |
|---|----------|----------|----------|
| N | 0.30952  | 1.19202  | -1.27326 |
| N | 0.30633  | 1.20332  | -0.01585 |
| C | -0.67066 | -1.14563 | -1.29995 |
| C | -1.02571 | -2.27018 | -2.04358 |
| C | -0.75500 | -2.32143 | -3.41416 |
| C | -0.13868 | -1.23611 | -4.04103 |
| H | 0.65155  | 0.74511  | -3.77355 |
| H | -0.89599 | -1.09784 | -0.24045 |
| H | -1.52493 | -3.11035 | -1.56163 |
| H | 0.05319  | -1.28511 | -5.10739 |
| C | 0.19575  | -0.11556 | -3.29456 |
| C | -0.04674 | -0.05656 | -1.91357 |
| C | 0.35217  | 1.20567  | 1.31567  |
| C | 0.34520  | 0.02778  | 2.13251  |
| C | 0.45416  | 2.44218  | 2.03814  |
| C | 0.45167  | 0.07891  | 3.50559  |
| H | 0.29038  | -0.93399 | 1.62933  |
| C | 0.50961  | 2.50534  | 3.41069  |
| H | 0.47496  | 3.35043  | 1.44057  |
| C | 0.52059  | 1.32193  | 4.24374  |
| H | 0.47431  | -0.84076 | 4.08878  |
| H | 0.57000  | 3.46880  | 3.91521  |
| O | 0.58774  | 1.36939  | 5.51451  |
| O | -1.07241 | -3.40175 | -4.19472 |
| H | -1.57438 | -4.05000 | -3.68743 |

### 7.34 $F_{NN} + 0.0075$ au OH-AB-O<sup>-</sup> Inversion TS Structure $S_0$ State

$$E_h = -722.8192$$

Cartesian Coordinates:

|   |          |          |          |
|---|----------|----------|----------|
| N | 0.48102  | 1.23868  | -1.24251 |
| N | 0.45018  | 1.25493  | 0.01428  |
| C | -0.71000 | -0.99933 | -1.34662 |
| C | -1.13040 | -2.07932 | -2.12225 |
| C | -0.78300 | -2.15182 | -3.47432 |
| C | -0.02557 | -1.13011 | -4.05211 |
| H | 0.93324  | 0.76457  | -3.71941 |
| H | -0.99825 | -0.93601 | -0.30337 |
| H | -1.74026 | -2.86638 | -1.68002 |
| H | 0.22276  | -1.19263 | -5.10605 |
| C | 0.37085  | -0.05100 | -3.27603 |
| C | 0.05472  | 0.02549  | -1.91074 |
| C | 0.39696  | 1.15754  | 1.34539  |
| C | 0.50642  | 2.34460  | 2.14215  |
| C | 0.29658  | -0.06384 | 2.08984  |
| C | 0.48414  | 2.32784  | 3.51728  |
| H | 0.59916  | 3.28164  | 1.59868  |
| C | 0.33109  | -0.09472 | 3.46764  |
| H | 0.23397  | -0.99421 | 1.53171  |
| C | 0.40798  | 1.10060  | 4.27974  |
| H | 0.55164  | 3.25859  | 4.07909  |
| H | 0.28732  | -1.04623 | 3.99587  |
| O | 0.41311  | 1.07460  | 5.55330  |
| O | -1.15564 | -3.19203 | -4.28354 |
| H | -1.76478 | -3.77999 | -3.82214 |

### 7.35 $F_{NN} + 0.0075$ au OH-AB-O<sup>-</sup> Cis Structure $S_0$ State

$$E_h = -722.8588$$

Cartesian Coordinates:

|   |          |          |          |
|---|----------|----------|----------|
| N | 1.40229  | -1.51117 | -0.63895 |
| N | 1.41323  | -1.48770 | 0.62349  |
| C | 0.87138  | 0.80780  | -1.37955 |
| C | 0.39321  | 1.65125  | -2.38102 |
| C | -0.27194 | 1.12430  | -3.49105 |
| C | -0.44570 | -0.25700 | -3.59635 |
| H | -0.01563 | -2.16920 | -2.72557 |
| H | 1.39917  | 1.23027  | -0.53118 |
| H | 0.55251  | 2.72513  | -2.30601 |
| H | -0.93575 | -0.65705 | -4.47729 |
| C | 0.05928  | -1.09288 | -2.61022 |
| C | 0.70260  | -0.57986 | -1.47183 |
| C | 0.57396  | -0.80772 | 1.51900  |
| C | 0.99311  | -0.94418 | 2.86493  |
| C | -0.67697 | -0.16372 | 1.31049  |
| C | 0.26865  | -0.45419 | 3.92946  |
| H | 1.92946  | -1.47455 | 3.02470  |
| C | -1.42676 | 0.30249  | 2.37112  |
| H | -1.06739 | -0.05428 | 0.30597  |
| C | -1.00546 | 0.20069  | 3.75486  |
| H | 0.62945  | -0.57790 | 4.95032  |
| H | -2.39028 | 0.77065  | 2.18263  |
| O | -1.69873 | 0.63250  | 4.72976  |
| O | -0.76914 | 1.89785  | -4.50456 |
| H | -0.43402 | 2.80036  | -4.44693 |

### 7.36 $F_{NN} + 0.0100$ au OH-AB-O<sup>-</sup> Trans Structure $S_0$ State

$$E_h = -722.8868$$

Cartesian Coordinates:

|   |          |          |          |
|---|----------|----------|----------|
| N | 0.02965  | 0.09087  | -0.67236 |
| N | 0.03195  | 0.09391  | 0.59597  |
| C | -0.75637 | -2.28336 | -0.52855 |
| C | -1.13872 | -3.44373 | -1.19320 |
| C | -1.14992 | -3.48797 | -2.59239 |
| C | -0.77456 | -2.35859 | -3.32137 |
| H | -0.10192 | -0.32385 | -3.21576 |
| H | -0.74617 | -2.24424 | 0.55415  |
| H | -1.43256 | -4.32683 | -0.62519 |
| H | -0.78744 | -2.40494 | -4.40463 |
| C | -0.39400 | -1.20315 | -2.65222 |
| C | -0.37608 | -1.13961 | -1.24802 |
| C | 0.41831  | 1.26690  | 1.23557  |
| C | 0.41088  | 1.23563  | 2.64471  |
| C | 0.81562  | 2.48125  | 0.61340  |
| C | 0.77189  | 2.33091  | 3.40500  |
| H | 0.10567  | 0.30241  | 3.11635  |
| C | 1.17770  | 3.58031  | 1.36017  |
| H | 0.82767  | 2.52441  | -0.47130 |
| C | 1.18129  | 3.58253  | 2.81264  |
| H | 0.75938  | 2.28575  | 4.49457  |
| H | 1.47785  | 4.49805  | 0.85987  |
| O | 1.51341  | 4.59193  | 3.51200  |
| O | -1.51670 | -4.60162 | -3.29573 |
| H | -1.75676 | -5.31904 | -2.69814 |

### 7.37 $F_{NN} + 0.0100$ au OH-AB-O<sup>-</sup> Rotation TS Structure $S_0$ State

$$E_h = -722.8279$$

Cartesian Coordinates:

|   |          |          |          |
|---|----------|----------|----------|
| N | 1.54083  | -0.44408 | -0.47975 |
| N | 1.51235  | -0.47657 | 0.82676  |
| C | 0.37922  | 1.68911  | -0.72646 |
| C | -0.09647 | 2.68598  | -1.58326 |
| C | 0.16092  | 2.63717  | -2.95033 |
| C | 0.88176  | 1.55086  | -3.47753 |
| H | 1.87631  | -0.29444 | -3.06885 |
| H | 0.15759  | 1.72812  | 0.33378  |
| H | -0.68263 | 3.50960  | -1.17557 |
| H | 1.06485  | 1.52019  | -4.54638 |
| C | 1.32945  | 0.54456  | -2.65301 |
| C | 1.09374  | 0.57284  | -1.24331 |
| C | 0.47640  | -1.08098 | 1.44489  |
| C | 0.57680  | -1.22306 | 2.86361  |
| C | -0.70195 | -1.60393 | 0.81609  |
| C | -0.41963 | -1.79363 | 3.60557  |
| H | 1.48905  | -0.84760 | 3.32362  |
| C | -1.71218 | -2.16253 | 1.56026  |
| H | -0.77698 | -1.52856 | -0.26369 |
| C | -1.64449 | -2.29815 | 3.00493  |
| H | -0.33461 | -1.88973 | 4.68824  |
| H | -2.61383 | -2.52267 | 1.07158  |
| O | -2.57163 | -2.79487 | 3.70868  |
| O | -0.26190 | 3.59042  | -3.84144 |
| H | -0.83189 | 4.23610  | -3.40861 |



**7.38**  $F_{NN}$  +0.0100 au OH-AB-O<sup>-</sup> Rotation Inversion TS Structure  $S_0$  State

$E_h = -722.8355$

Cartesian Coordinates:

|   |          |          |          |
|---|----------|----------|----------|
| N | 0.46637  | 1.13242  | -1.26975 |
| N | 0.40966  | 1.16281  | -0.01681 |
| C | -0.65251 | -1.14294 | -1.29751 |
| C | -1.07370 | -2.23999 | -2.04626 |
| C | -0.81423 | -2.29781 | -3.42110 |
| C | -0.13929 | -1.24555 | -4.04562 |
| H | 0.76460  | 0.68270  | -3.77264 |
| H | -0.86742 | -1.09028 | -0.23566 |
| H | -1.61579 | -3.05511 | -1.56815 |
| H | 0.04118  | -1.29875 | -5.11367 |
| C | 0.26324  | -0.15217 | -3.29418 |
| C | 0.02949  | -0.08829 | -1.91073 |
| C | 0.39512  | 1.18191  | 1.31796  |
| C | 0.46867  | 0.01703  | 2.14406  |
| C | 0.36717  | 2.42621  | 2.02885  |
| C | 0.55445  | 0.09345  | 3.52310  |
| H | 0.51042  | -0.95026 | 1.64977  |
| C | 0.36703  | 2.50093  | 3.40603  |
| H | 0.32781  | 3.32993  | 1.42550  |
| C | 0.48217  | 1.33644  | 4.25130  |
| H | 0.66079  | -0.81805 | 4.11127  |
| H | 0.31765  | 3.47269  | 3.89719  |
| O | 0.52043  | 1.40195  | 5.53331  |
| O | -1.19128 | -3.34862 | -4.20539 |
| H | -1.74941 | -3.96504 | -3.71730 |

### 7.39 $F_{NN} + 0.0100$ au OH-AB-O<sup>-</sup> Inversion TS Structure $S_0$ State

$$E_h = -722.8372$$

Cartesian Coordinates:

|   |          |          |          |
|---|----------|----------|----------|
| N | 0.63205  | 1.16431  | -1.23237 |
| N | 0.55106  | 1.20052  | 0.01894  |
| C | -0.68164 | -1.00567 | -1.34196 |
| C | -1.16418 | -2.05143 | -2.12681 |
| C | -0.83862 | -2.12190 | -3.48692 |
| C | -0.03678 | -1.13180 | -4.06155 |
| H | 1.02148  | 0.70396  | -3.71758 |
| H | -0.95081 | -0.94447 | -0.29312 |
| H | -1.80563 | -2.81500 | -1.68877 |
| H | 0.19216  | -1.19165 | -5.11991 |
| C | 0.42403  | -0.08689 | -3.27602 |
| C | 0.12682  | -0.01353 | -1.90506 |
| C | 0.43404  | 1.12652  | 1.35043  |
| C | 0.42428  | 2.33046  | 2.12518  |
| C | 0.40425  | -0.08273 | 2.11313  |
| C | 0.35237  | 2.33223  | 3.50255  |
| H | 0.46300  | 3.26421  | 1.56966  |
| C | 0.42124  | -0.08327 | 3.49762  |
| H | 0.42743  | -1.02511 | 1.57188  |
| C | 0.37287  | 1.12161  | 4.28826  |
| H | 0.32102  | 3.27845  | 4.04273  |
| H | 0.45299  | -1.02892 | 4.03864  |
| O | 0.35634  | 1.12047  | 5.57289  |
| O | -1.26764 | -3.12589 | -4.30396 |
| H | -1.91887 | -3.68300 | -3.86199 |

## 7.40 $F_{NN} + 0.0100$ au OH-AB-O<sup>-</sup> Cis Structure $S_0$ State

$$E_h = -722.8764$$

Cartesian Coordinates:

|   |          |          |          |
|---|----------|----------|----------|
| N | 1.32889  | -1.52879 | -0.64635 |
| N | 1.34893  | -1.49319 | 0.61330  |
| C | 0.78341  | 0.80495  | -1.36875 |
| C | 0.34837  | 1.64860  | -2.39019 |
| C | -0.24073 | 1.12014  | -3.54350 |
| C | -0.38111 | -0.26489 | -3.67092 |
| H | 0.05349  | -2.17407 | -2.80337 |
| H | 1.25965  | 1.23125  | -0.49230 |
| H | 0.48668  | 2.72401  | -2.30094 |
| H | -0.80529 | -0.66409 | -4.58565 |
| C | 0.08725  | -1.09821 | -2.66762 |
| C | 0.65005  | -0.58470 | -1.48514 |
| C | 0.54321  | -0.78555 | 1.53061  |
| C | 0.99698  | -0.93692 | 2.86108  |
| C | -0.70796 | -0.13479 | 1.36572  |
| C | 0.30138  | -0.45805 | 3.95332  |
| H | 1.93344  | -1.47598 | 2.98882  |
| C | -1.42984 | 0.31793  | 2.45625  |
| H | -1.12289 | -0.00762 | 0.37262  |
| C | -0.97600 | 0.19437  | 3.82514  |
| H | 0.69189  | -0.59773 | 4.96239  |
| H | -2.39621 | 0.79105  | 2.29547  |
| O | -1.64615 | 0.60822  | 4.83303  |
| O | -0.69157 | 1.88494  | -4.57661 |
| H | -0.36530 | 2.79106  | -4.52020 |

## 8 Cartesian coordinates and energies of deprotonated OH-AB-O<sup>-</sup> structures in $F_{OC}$ conditions

### 8.1 $F_{OC}$ -0.0025 au OH-AB-O<sup>-</sup> Trans Structure $S_0$ State

$$E_h = -722.8394$$

Cartesian Coordinates:

|   |          |          |          |
|---|----------|----------|----------|
| O | -0.24308 | -0.73366 | -5.81885 |
| C | -0.21743 | -0.65662 | -4.42569 |
| C | -0.57273 | -1.73403 | -2.30164 |
| C | -0.18950 | -0.57307 | -1.59827 |
| C | 0.18184  | 0.55271  | -2.36626 |
| C | 0.16622  | 0.50585  | -3.75606 |
| H | -0.88640 | -2.68384 | -4.21542 |
| H | -0.85982 | -2.60416 | -1.71963 |
| H | 0.47928  | 1.45414  | -1.84529 |
| H | 0.45752  | 1.38910  | -4.32686 |
| N | -0.21053 | -0.63686 | -0.20603 |
| N | 0.15429  | 0.46357  | 0.37049  |
| C | 0.16540  | 0.49788  | 1.72408  |
| C | 0.57226  | 1.72408  | 2.33381  |
| C | -0.19429 | -0.58457 | 2.59203  |
| C | 0.62320  | 1.87940  | 3.68942  |
| H | 0.84361  | 2.54035  | 1.66799  |
| C | -0.14889 | -0.44576 | 3.94720  |
| H | -0.50430 | -1.51904 | 2.13706  |
| C | 0.26387  | 0.79873  | 4.59932  |
| H | 0.93429  | 2.81690  | 4.14173  |
| H | -0.42148 | -1.26584 | 4.60645  |
| O | 0.30269  | 0.91782  | 5.83928  |
| C | -0.58820 | -1.78046 | -3.69152 |
| H | 0.03792  | 0.11928  | -6.16906 |

## 8.2 $F_{OC}$ -0.0025 au OH-AB-O<sup>-</sup> Rotation TS Structure $S_0$ State

$$E_h = -722.8000$$

Cartesian Coordinates:

|   |          |          |          |
|---|----------|----------|----------|
| N | 0.82445  | 1.47200  | -0.09610 |
| N | 0.34487  | 1.37355  | 1.13493  |
| C | -1.21228 | 0.74906  | -1.23606 |
| C | -1.87455 | 0.51443  | -2.43948 |
| C | -1.25535 | 0.74357  | -3.66357 |
| C | 0.05451  | 1.23115  | -3.67576 |
| H | 1.74776  | 1.86266  | -2.51608 |
| H | -1.71294 | 0.54579  | -0.29630 |
| H | -2.89904 | 0.13883  | -2.41075 |
| H | 0.54106  | 1.41098  | -4.63161 |
| C | 0.73091  | 1.48187  | -2.49353 |
| C | 0.13231  | 1.24479  | -1.21276 |
| C | 0.51596  | 0.23829  | 1.80082  |
| C | 0.06423  | 0.20224  | 3.17188  |
| C | 1.10999  | -0.96357 | 1.25835  |
| C | 0.13459  | -0.92726 | 3.91857  |
| H | -0.35311 | 1.12220  | 3.57168  |
| C | 1.18581  | -2.09761 | 1.99532  |
| H | 1.48243  | -0.91852 | 0.24092  |
| C | 0.69281  | -2.17004 | 3.37807  |
| H | -0.22163 | -0.95819 | 4.94374  |
| H | 1.61549  | -3.01119 | 1.59342  |
| O | 0.74850  | -3.21799 | 4.03677  |
| O | -1.89721 | 0.50554  | -4.89506 |
| H | -2.70082 | 0.00664  | -4.71131 |

### 8.3 $F_{OC}$ -0.0025 au OH-AB-O<sup>-</sup> Rotation Inversion TS Structure

#### $S_0$ State

$$E_h = -722.7745$$

Cartesian Coordinates:

|   |          |          |          |
|---|----------|----------|----------|
| N | -0.98771 | 1.42247  | -0.48080 |
| N | -0.55163 | 0.94995  | 0.61822  |
| C | -0.24527 | -0.65133 | -1.69953 |
| C | -0.04139 | -1.30630 | -2.91211 |
| C | -0.26419 | -0.64162 | -4.11661 |
| C | -0.70900 | 0.68001  | -4.10412 |
| H | -1.28621 | 2.34666  | -2.85927 |
| H | -0.08222 | -1.17058 | -0.76298 |
| H | 0.28958  | -2.34580 | -2.91712 |
| H | -0.88020 | 1.19062  | -5.04772 |
| C | -0.92618 | 1.32183  | -2.88977 |
| C | -0.68573 | 0.68085  | -1.66284 |
| C | -0.06371 | 0.49298  | 1.74474  |
| C | 0.88041  | -0.60628 | 1.83266  |
| C | -0.43140 | 1.08514  | 3.01848  |
| C | 1.39348  | -1.04589 | 3.01514  |
| H | 1.20060  | -1.06779 | 0.90194  |
| C | 0.05401  | 0.64203  | 4.21079  |
| H | -1.13587 | 1.91275  | 2.98060  |
| C | 1.01063  | -0.45926 | 4.29805  |
| H | 2.11069  | -1.86231 | 3.05273  |
| H | -0.24785 | 1.09794  | 5.15018  |
| O | 1.46741  | -0.87018 | 5.38045  |
| O | -0.06452 | -1.25852 | -5.35006 |
| H | 0.25328  | -2.15445 | -5.18887 |

## 8.4 $F_{OC}$ -0.0025 au OH-AB-O<sup>-</sup> Inversion TS Structure $S_0$ State

$$E_h = -722.7753$$

Cartesian Coordinates:

|   |          |          |          |
|---|----------|----------|----------|
| O | -0.55345 | -1.74431 | -5.12551 |
| C | -0.52106 | -1.67896 | -3.73419 |
| C | -1.17238 | -2.63086 | -1.62107 |
| C | -0.51152 | -1.61056 | -0.91671 |
| C | 0.16480  | -0.63486 | -1.66476 |
| C | 0.16542  | -0.67261 | -3.05805 |
| H | -1.72602 | -3.44480 | -3.54595 |
| H | -1.67507 | -3.39935 | -1.04043 |
| H | 0.71009  | 0.14102  | -1.14169 |
| H | 0.70987  | 0.08751  | -3.62050 |
| N | -0.50108 | -1.71613 | 0.51118  |
| N | -0.17127 | -0.67928 | 1.16939  |
| C | 0.16335  | 0.45054  | 1.75109  |
| C | 0.42492  | 0.48921  | 3.17572  |
| C | 0.27158  | 1.72948  | 1.07494  |
| C | 0.78339  | 1.62736  | 3.83422  |
| H | 0.33289  | -0.45444 | 3.70752  |
| C | 0.59833  | 2.88182  | 1.72539  |
| H | 0.04603  | 1.75853  | 0.01207  |
| C | 0.90129  | 2.91321  | 3.15394  |
| H | 0.98752  | 1.61993  | 4.90168  |
| H | 0.65459  | 3.83203  | 1.19906  |
| O | 1.23252  | 3.96266  | 3.74031  |
| C | -1.19390 | -2.66352 | -3.01085 |
| H | -0.06254 | -0.99003 | -5.47133 |

## 8.5 $F_{OC}$ -0.0025 au OH-AB-O<sup>-</sup> Cis Structure $S_0$ State

$$E_h = -722.8162$$

Cartesian Coordinates:

|   |          |          |          |
|---|----------|----------|----------|
| O | -0.52239 | -1.71229 | -4.45592 |
| C | -0.47701 | -1.70428 | -3.06409 |
| C | -1.58047 | -2.14179 | -0.96781 |
| C | -0.46401 | -1.69342 | -0.24213 |
| C | 0.66429  | -1.27852 | -0.97560 |
| C | 0.65839  | -1.29037 | -2.36505 |
| H | -2.47622 | -2.46064 | -2.90925 |
| H | -2.44497 | -2.49390 | -0.41372 |
| H | 1.54457  | -0.93568 | -0.44377 |
| H | 1.54574  | -0.96636 | -2.90866 |
| N | -0.42961 | -1.89834 | 1.15734  |
| N | -0.00911 | -1.04052 | 2.00568  |
| C | 0.20218  | 0.30390  | 1.80965  |
| C | 0.94055  | 0.95275  | 2.84407  |
| C | -0.30496 | 1.13774  | 0.76505  |
| C | 1.25725  | 2.28412  | 2.79907  |
| H | 1.26793  | 0.33082  | 3.67328  |
| C | -0.03142 | 2.47807  | 0.72848  |
| H | -0.95320 | 0.71429  | 0.00757  |
| C | 0.81295  | 3.14260  | 1.71448  |
| H | 1.84169  | 2.74644  | 3.58981  |
| H | -0.45335 | 3.10835  | -0.05081 |
| O | 1.10350  | 4.35897  | 1.63384  |
| C | -1.59752 | -2.13376 | -2.36131 |
| H | 0.27376  | -1.27958 | -4.78480 |



## 8.6 $F_{OC}$ -0.0050 au OH-AB-O<sup>-</sup> Trans Structure $S_0$ State

$$E_h = -722.8334$$

Cartesian Coordinates:

|   |          |          |          |
|---|----------|----------|----------|
| O | -0.23739 | -0.71613 | -5.82608 |
| C | -0.21681 | -0.65456 | -4.42224 |
| C | -0.57585 | -1.74289 | -2.30338 |
| C | -0.19321 | -0.58443 | -1.58727 |
| C | 0.17991  | 0.54615  | -2.35588 |
| C | 0.16565  | 0.50357  | -3.74545 |
| H | -0.88710 | -2.68465 | -4.21962 |
| H | -0.86410 | -2.61611 | -1.72636 |
| H | 0.47665  | 1.44488  | -1.82999 |
| H | 0.45848  | 1.39093  | -4.31149 |
| N | -0.21552 | -0.65221 | -0.20511 |
| N | 0.15258  | 0.45845  | 0.37403  |
| C | 0.16443  | 0.49490  | 1.71832  |
| C | 0.57329  | 1.72778  | 2.32646  |
| C | -0.19560 | -0.58922 | 2.59283  |
| C | 0.62562  | 1.88738  | 3.67724  |
| H | 0.84348  | 2.54099  | 1.65658  |
| C | -0.14901 | -0.44675 | 3.94402  |
| H | -0.50566 | -1.52441 | 2.14022  |
| C | 0.26570  | 0.80440  | 4.59097  |
| H | 0.93620  | 2.82386  | 4.13108  |
| H | -0.41972 | -1.26163 | 4.60970  |
| O | 0.30576  | 0.92748  | 5.82375  |
| C | -0.58886 | -1.78171 | -3.69360 |
| H | 0.04684  | 0.14584  | -6.15044 |

## 8.7 $F_{OC}$ -0.0050 au OH-AB-O<sup>-</sup> Rotation TS Structure $S_0$ State

$$E_h = -722.8012$$

Cartesian Coordinates:

|   |          |          |          |
|---|----------|----------|----------|
| N | 0.83026  | 1.47408  | -0.10011 |
| N | 0.35409  | 1.37565  | 1.13815  |
| C | -1.21632 | 0.76054  | -1.23143 |
| C | -1.88237 | 0.53131  | -2.43113 |
| C | -1.26275 | 0.74791  | -3.65914 |
| C | 0.05042  | 1.22461  | -3.67607 |
| H | 1.75115  | 1.85207  | -2.52093 |
| H | -1.71758 | 0.56680  | -0.28997 |
| H | -2.91212 | 0.16965  | -2.39830 |
| H | 0.53878  | 1.39592  | -4.63361 |
| C | 0.73180  | 1.47753  | -2.49595 |
| C | 0.13625  | 1.24736  | -1.20896 |
| C | 0.52624  | 0.24575  | 1.80349  |
| C | 0.06544  | 0.20273  | 3.17535  |
| C | 1.13214  | -0.95337 | 1.26042  |
| C | 0.12149  | -0.93201 | 3.91227  |
| H | -0.34816 | 1.12151  | 3.58087  |
| C | 1.19737  | -2.09072 | 1.98852  |
| H | 1.52451  | -0.89796 | 0.25105  |
| C | 0.67270  | -2.17577 | 3.36201  |
| H | -0.24126 | -0.96968 | 4.93456  |
| H | 1.64014  | -3.00065 | 1.59258  |
| O | 0.70138  | -3.23388 | 3.99898  |
| O | -1.92093 | 0.50443  | -4.89035 |
| H | -2.67392 | -0.06459 | -4.69618 |

## 8.8 $F_{OC}$ -0.0050 au OH-AB-O<sup>-</sup> Rotation Inversion TS Structure

### $S_0$ State

$$E_h = -722.7698$$

Cartesian Coordinates:

|   |          |          |          |
|---|----------|----------|----------|
| N | -0.95975 | 1.44521  | -0.49007 |
| N | -0.53256 | 0.96500  | 0.61661  |
| C | -0.23844 | -0.63764 | -1.69231 |
| C | -0.04931 | -1.30362 | -2.90045 |
| C | -0.27526 | -0.64968 | -4.10975 |
| C | -0.70888 | 0.67575  | -4.10612 |
| H | -1.26430 | 2.35969  | -2.87229 |
| H | -0.07327 | -1.14983 | -0.75243 |
| H | 0.27347  | -2.34649 | -2.89654 |
| H | -0.88206 | 1.18181  | -5.05284 |
| C | -0.91255 | 1.33152  | -2.89636 |
| C | -0.66977 | 0.70186  | -1.66087 |
| C | -0.05659 | 0.50507  | 1.73966  |
| C | 0.90264  | -0.58852 | 1.82287  |
| C | -0.44658 | 1.07583  | 3.02257  |
| C | 1.40743  | -1.03809 | 3.00100  |
| H | 1.23842  | -1.03031 | 0.88778  |
| C | 0.02886  | 0.62065  | 4.21097  |
| H | -1.16100 | 1.89482  | 2.98971  |
| C | 0.99998  | -0.47285 | 4.29012  |
| H | 2.13455  | -1.84536 | 3.03974  |
| H | -0.28764 | 1.05521  | 5.15508  |
| O | 1.45030  | -0.89427 | 5.36470  |
| O | -0.08609 | -1.28965 | -5.34211 |
| H | 0.22537  | -2.18315 | -5.15650 |

## 8.9 $F_{OC}$ -0.0050 au OH-AB-O<sup>-</sup> Inversion TS Structure $S_0$ State

$$E_h = -722.7702$$

Cartesian Coordinates:

|   |          |          |          |
|---|----------|----------|----------|
| O | -0.50459 | -1.73374 | -5.12676 |
| C | -0.50016 | -1.67661 | -3.72650 |
| C | -1.18557 | -2.63072 | -1.62499 |
| C | -0.53782 | -1.60918 | -0.90611 |
| C | 0.14892  | -0.63034 | -1.64607 |
| C | 0.17256  | -0.66982 | -3.03866 |
| H | -1.70842 | -3.44477 | -3.55735 |
| H | -1.69573 | -3.40047 | -1.05254 |
| H | 0.68341  | 0.14604  | -1.11303 |
| H | 0.72594  | 0.09222  | -3.59187 |
| N | -0.54022 | -1.71529 | 0.51369  |
| N | -0.20291 | -0.67744 | 1.17414  |
| C | 0.13841  | 0.44557  | 1.75363  |
| C | 0.43753  | 0.48525  | 3.17482  |
| C | 0.22441  | 1.72792  | 1.07329  |
| C | 0.82025  | 1.62087  | 3.81999  |
| H | 0.35550  | -0.45632 | 3.71132  |
| C | 0.57154  | 2.87762  | 1.71198  |
| H | -0.04016 | 1.75545  | 0.01908  |
| C | 0.92835  | 2.90520  | 3.13097  |
| H | 1.05360  | 1.61544  | 4.88099  |
| H | 0.60885  | 3.83084  | 1.18926  |
| O | 1.29365  | 3.95077  | 3.69574  |
| C | -1.18407 | -2.66227 | -3.01537 |
| H | -0.00494 | -0.97265 | -5.44419 |

## 8.10 $F_{OC}$ -0.0050 au OH-AB-O<sup>-</sup> Cis Structure $S_0$ State

$$E_h = -722.8122$$

Cartesian Coordinates:

|   |          |          |          |
|---|----------|----------|----------|
| O | -0.47277 | -1.66500 | -4.44600 |
| C | -0.45402 | -1.68177 | -3.04618 |
| C | -1.57735 | -2.16449 | -0.97056 |
| C | -0.48187 | -1.69713 | -0.22295 |
| C | 0.65003  | -1.25424 | -0.93870 |
| C | 0.66394  | -1.25458 | -2.32695 |
| H | -2.44083 | -2.47943 | -2.92702 |
| H | -2.44262 | -2.53715 | -0.43136 |
| H | 1.51440  | -0.89758 | -0.39053 |
| H | 1.55325  | -0.90804 | -2.85439 |
| N | -0.46242 | -1.90627 | 1.17235  |
| N | -0.04658 | -1.04653 | 2.02301  |
| C | 0.16825  | 0.29254  | 1.82639  |
| C | 0.94305  | 0.94522  | 2.83305  |
| C | -0.36221 | 1.11785  | 0.78643  |
| C | 1.29308  | 2.26561  | 2.74537  |
| H | 1.27516  | 0.33520  | 3.66876  |
| C | -0.05816 | 2.44851  | 0.71104  |
| H | -1.05536 | 0.69311  | 0.06989  |
| C | 0.84978  | 3.10601  | 1.64508  |
| H | 1.90689  | 2.73152  | 3.51080  |
| H | -0.50091 | 3.07839  | -0.05721 |
| O | 1.18913  | 4.30377  | 1.50763  |
| C | -1.57412 | -2.14292 | -2.36509 |
| H | 0.29084  | -1.15399 | -4.73747 |

## 8.11 $F_{OC}$ -0.0075 au OH-AB-O<sup>-</sup> Trans Structure $S_0$ State

$$E_h = -722.8313$$

Cartesian Coordinates:

|   |          |          |          |
|---|----------|----------|----------|
| O | -0.23283 | -0.70222 | -5.83566 |
| C | -0.21679 | -0.65442 | -4.42066 |
| C | -0.57851 | -1.75072 | -2.30499 |
| C | -0.19607 | -0.59317 | -1.57741 |
| C | 0.17856  | 0.54172  | -2.34924 |
| C | 0.16481  | 0.50073  | -3.73827 |
| H | -0.88826 | -2.68754 | -4.22173 |
| H | -0.86758 | -2.62619 | -1.73157 |
| H | 0.47479  | 1.43864  | -1.82010 |
| H | 0.45879  | 1.39134  | -4.30145 |
| N | -0.21918 | -0.66344 | -0.20585 |
| N | 0.15198  | 0.45707  | 0.37782  |
| C | 0.16393  | 0.49380  | 1.71405  |
| C | 0.57476  | 1.73251  | 2.32242  |
| C | -0.19675 | -0.59299 | 2.59365  |
| C | 0.62780  | 1.89443  | 3.66897  |
| H | 0.84432  | 2.54357  | 1.64985  |
| C | -0.14957 | -0.44859 | 3.94146  |
| H | -0.50668 | -1.52843 | 2.14229  |
| C | 0.26633  | 0.80828  | 4.58532  |
| H | 0.93800  | 2.82934  | 4.12560  |
| H | -0.41862 | -1.25934 | 4.61230  |
| O | 0.30806  | 0.93369  | 5.81169  |
| C | -0.58976 | -1.78407 | -3.69518 |
| H | 0.05419  | 0.16788  | -6.13503 |

## 8.12 $F_{OC}$ -0.0075 au OH-AB-O<sup>-</sup> Rotation TS Structure $S_0$ State

$$E_h = -722.8047$$

Cartesian Coordinates:

|   |          |          |          |
|---|----------|----------|----------|
| N | 0.83473  | 1.47607  | -0.10330 |
| N | 0.36207  | 1.37746  | 1.14213  |
| C | -1.22317 | 0.77587  | -1.22655 |
| C | -1.89244 | 0.55207  | -2.42268 |
| C | -1.27166 | 0.75615  | -3.65468 |
| C | 0.04603  | 1.21953  | -3.67571 |
| H | 1.75431  | 1.84103  | -2.52431 |
| H | -1.72539 | 0.59304  | -0.28337 |
| H | -2.92732 | 0.20499  | -2.38660 |
| H | 0.53677  | 1.38087  | -4.63497 |
| C | 0.73210  | 1.47380  | -2.49766 |
| C | 0.13845  | 1.25093  | -1.20457 |
| C | 0.53459  | 0.25191  | 1.80637  |
| C | 0.06754  | 0.20184  | 3.17984  |
| C | 1.15186  | -0.94423 | 1.26209  |
| C | 0.11111  | -0.93817 | 3.90687  |
| H | -0.34115 | 1.11937  | 3.59241  |
| C | 1.20792  | -2.08498 | 1.98148  |
| H | 1.56295  | -0.87862 | 0.26080  |
| C | 0.65346  | -2.18280 | 3.34537  |
| H | -0.25591 | -0.98246 | 4.92716  |
| H | 1.66304  | -2.99118 | 1.59092  |
| O | 0.65418  | -3.25123 | 3.95903  |
| O | -1.94356 | 0.50152  | -4.88565 |
| H | -2.63176 | -0.14356 | -4.68829 |

### 8.13 $F_{OC}$ -0.0075 au OH-AB-OH Rotation Inversion TS Structure $S_0$ State

$$E_h = -722.7683$$

Cartesian Coordinates:

|   |          |          |          |
|---|----------|----------|----------|
| N | -0.91094 | 1.47711  | -0.50287 |
| N | -0.49845 | 0.98702  | 0.61296  |
| C | -0.22333 | -0.62149 | -1.68515 |
| C | -0.06212 | -1.30227 | -2.88811 |
| C | -0.29801 | -0.66237 | -4.10298 |
| C | -0.71131 | 0.67007  | -4.10932 |
| H | -1.22662 | 2.37758  | -2.88940 |
| H | -0.05171 | -1.12552 | -0.74212 |
| H | 0.24714  | -2.35005 | -2.87425 |
| H | -0.89112 | 1.16978  | -5.05950 |
| C | -0.88847 | 1.34439  | -2.90546 |
| C | -0.63936 | 0.72832  | -1.66015 |
| C | -0.03971 | 0.52170  | 1.73385  |
| C | 0.94615  | -0.55563 | 1.81462  |
| C | -0.47023 | 1.05801  | 3.02472  |
| C | 1.43447  | -1.01869 | 2.99056  |
| H | 1.31210  | -0.96534 | 0.87591  |
| C | -0.01351 | 0.58568  | 4.21066  |
| H | -1.20103 | 1.86220  | 2.99461  |
| C | 0.98080  | -0.49147 | 4.28487  |
| H | 2.18006  | -1.80847 | 3.03304  |
| H | -0.35833 | 0.98877  | 5.15840  |
| O | 1.41369  | -0.93066 | 5.35334  |
| O | -0.13386 | -1.33091 | -5.33344 |
| H | 0.16067  | -2.22481 | -5.12264 |



## 8.14 $F_{OC}$ -0.0075 au OH-AB-O<sup>-</sup> Inversion TS Structure $S_0$ State

$$E_h = -722.7677$$

Cartesian Coordinates:

|   |          |          |          |
|---|----------|----------|----------|
| O | -0.43802 | -1.74434 | -5.13010 |
| C | -0.47138 | -1.68444 | -3.72231 |
| C | -1.20174 | -2.62786 | -1.63033 |
| C | -0.57532 | -1.59756 | -0.89968 |
| C | 0.11907  | -0.61504 | -1.63489 |
| C | 0.17516  | -0.66713 | -3.02561 |
| H | -1.67628 | -3.45940 | -3.56609 |
| H | -1.71855 | -3.39787 | -1.06425 |
| H | 0.63402  | 0.16994  | -1.09534 |
| H | 0.73523  | 0.09683  | -3.57210 |
| N | -0.59569 | -1.69963 | 0.51093  |
| N | -0.24672 | -0.66517 | 1.17692  |
| C | 0.10648  | 0.44724  | 1.75796  |
| C | 0.45418  | 0.47894  | 3.17235  |
| C | 0.16526  | 1.73692  | 1.08063  |
| C | 0.86951  | 1.60738  | 3.80591  |
| H | 0.38310  | -0.46307 | 3.70906  |
| C | 0.54106  | 2.87918  | 1.71038  |
| H | -0.14805 | 1.76872  | 0.03957  |
| C | 0.96699  | 2.89302  | 3.11355  |
| H | 1.14007  | 1.59786  | 4.85767  |
| H | 0.55646  | 3.83850  | 1.19771  |
| O | 1.37807  | 3.92914  | 3.65582  |
| C | -1.16793 | -2.66832 | -3.02015 |
| H | 0.07336  | -0.98025 | -5.42213 |

### 8.15 $F_{OC}$ -0.0075 au OH-AB-O<sup>-</sup> Cis Structure $S_0$ State

$$E_h = -722.8101$$

Cartesian Coordinates:

|   |          |          |          |
|---|----------|----------|----------|
| O | -0.42462 | -1.62101 | -4.43668 |
| C | -0.43017 | -1.66364 | -3.02935 |
| C | -1.57199 | -2.18594 | -0.97309 |
| C | -0.49719 | -1.69950 | -0.20495 |
| C | 0.63800  | -1.23166 | -0.90467 |
| C | 0.67111  | -1.22377 | -2.29139 |
| H | -2.40531 | -2.49714 | -2.94289 |
| H | -2.43761 | -2.57709 | -0.44778 |
| H | 1.48727  | -0.86259 | -0.34164 |
| H | 1.56245  | -0.85858 | -2.80366 |
| N | -0.49214 | -1.91176 | 1.18577  |
| N | -0.08141 | -1.05081 | 2.03944  |
| C | 0.13683  | 0.28321  | 1.84338  |
| C | 0.94173  | 0.93960  | 2.82551  |
| C | -0.41245 | 1.10018  | 0.80620  |
| C | 1.32233  | 2.24767  | 2.69602  |
| H | 1.27530  | 0.34232  | 3.66946  |
| C | -0.08005 | 2.41987  | 0.69270  |
| H | -1.14404 | 0.67507  | 0.12848  |
| C | 0.88350  | 3.06788  | 1.57765  |
| H | 1.96061  | 2.71718  | 3.43841  |
| H | -0.53887 | 3.04985  | -0.06626 |
| O | 1.26858  | 4.24322  | 1.38346  |
| C | -1.54956 | -2.15253 | -2.36820 |
| H | 0.28627  | -1.02141 | -4.69052 |

## 8.16 $F_{OC}$ -0.0100 au OH-AB-O<sup>-</sup> Trans Structure $S_0$ State

$$E_h = -722.8330$$

Cartesian Coordinates:

|   |          |          |          |
|---|----------|----------|----------|
| O | -0.22897 | -0.69045 | -5.84695 |
| C | -0.21712 | -0.65537 | -4.42069 |
| C | -0.58106 | -1.75809 | -2.30688 |
| C | -0.19845 | -0.60045 | -1.56844 |
| C | 0.17765  | 0.53859  | -2.34514 |
| C | 0.16391  | 0.49769  | -3.73340 |
| H | -0.88993 | -2.69187 | -4.22281 |
| H | -0.87083 | -2.63542 | -1.73639 |
| H | 0.47359  | 1.43436  | -1.81393 |
| H | 0.45890  | 1.39108  | -4.29488 |
| N | -0.22202 | -0.67219 | -0.20787 |
| N | 0.15219  | 0.45796  | 0.38168  |
| C | 0.16385  | 0.49374  | 1.71090  |
| C | 0.57638  | 1.73773  | 2.32063  |
| C | -0.19765 | -0.59608 | 2.59483  |
| C | 0.62975  | 1.90074  | 3.66354  |
| H | 0.84541  | 2.54727  | 1.64619  |
| C | -0.15016 | -0.45068 | 3.93986  |
| H | -0.50741 | -1.53150 | 2.14410  |
| C | 0.26690  | 0.81097  | 4.58179  |
| H | 0.93940  | 2.83397  | 4.12350  |
| H | -0.41787 | -1.25800 | 4.61498  |
| O | 0.30961  | 0.93817  | 5.80237  |
| C | -0.59093 | -1.78721 | -3.69676 |
| H | 0.06060  | 0.18696  | -6.12197 |

### 8.17 $F_{OC}$ -0.0100 au OH-AB-O<sup>-</sup> Rotation TS Structure $S_0$ State

$$E_h = -722.8105$$

Cartesian Coordinates:

|   |          |          |          |
|---|----------|----------|----------|
| N | 0.81303  | 1.41492  | -0.13918 |
| N | 0.32652  | 1.32435  | 1.10718  |
| C | -1.19268 | 0.58311  | -1.27600 |
| C | -1.85502 | 0.36740  | -2.47432 |
| C | -1.26739 | 0.68372  | -3.70277 |
| C | 0.02676  | 1.21280  | -3.71217 |
| H | 1.72832  | 1.83550  | -2.54819 |
| H | -1.67620 | 0.33476  | -0.33796 |
| H | -2.85915 | -0.06005 | -2.44922 |
| H | 0.48781  | 1.47172  | -4.66629 |
| C | 0.72510  | 1.41807  | -2.53189 |
| C | 0.14339  | 1.13924  | -1.23910 |
| C | 0.52442  | 0.23308  | 1.81065  |
| C | 0.03277  | 0.21562  | 3.18079  |
| C | 1.20320  | -0.95751 | 1.32316  |
| C | 0.09764  | -0.89483 | 3.94765  |
| H | -0.40964 | 1.13382  | 3.55474  |
| C | 1.28244  | -2.06764 | 2.08353  |
| H | 1.64267  | -0.90907 | 0.33279  |
| C | 0.68578  | -2.14177 | 3.43479  |
| H | -0.28426 | -0.91605 | 4.96315  |
| H | 1.78614  | -2.96836 | 1.74351  |
| O | 0.69126  | -3.19337 | 4.06995  |
| O | -1.97704 | 0.50712  | -4.93623 |
| H | -2.87711 | 0.81264  | -4.77244 |

## 8.18 $F_{OC}$ -0.0100 au OH-AB-O<sup>-</sup> Rotation Inversion TS Structure

### $S_0$ State

$$E_h = -722.7706$$

Cartesian Coordinates:

|   |          |          |          |
|---|----------|----------|----------|
| N | -0.82667 | 1.52153  | -0.51816 |
| N | -0.44192 | 1.01866  | 0.60666  |
| C | -0.19741 | -0.60462 | -1.67759 |
| C | -0.08940 | -1.30633 | -2.87376 |
| C | -0.34846 | -0.68507 | -4.09410 |
| C | -0.71302 | 0.66267  | -4.11190 |
| H | -1.14625 | 2.40536  | -2.91112 |
| H | -0.01244 | -1.10041 | -0.73255 |
| H | 0.19554  | -2.36167 | -2.84912 |
| H | -0.90325 | 1.15504  | -5.06554 |
| C | -0.83775 | 1.36259  | -2.91643 |
| C | -0.58404 | 0.75961  | -1.66116 |
| C | -0.00790 | 0.54536  | 1.72755  |
| C | 1.02713  | -0.49172 | 1.81025  |
| C | -0.51288 | 1.02136  | 3.02057  |
| C | 1.48733  | -0.97280 | 2.98660  |
| H | 1.44794  | -0.84556 | 0.87144  |
| C | -0.08628 | 0.52511  | 4.20499  |
| H | -1.27375 | 1.79658  | 2.98800  |
| C | 0.94918  | -0.51694 | 4.28058  |
| H | 2.26817  | -1.72680 | 3.03847  |
| H | -0.48253 | 0.87777  | 5.15249  |
| O | 1.34844  | -0.98585 | 5.34355  |
| O | -0.23061 | -1.38511 | -5.32033 |
| H | 0.02781  | -2.28581 | -5.08726 |

### 8.19 $F_{OC}$ -0.0100 au OH-AB-O<sup>-</sup> Inversion TS Structure $S_0$ State

$$E_h = -722.7689$$

Cartesian Coordinates:

|   |          |          |          |
|---|----------|----------|----------|
| O | -0.32679 | -1.83023 | -5.13032 |
| C | -0.41139 | -1.72695 | -3.72787 |
| C | -1.23517 | -2.60424 | -1.63673 |
| C | -0.64115 | -1.54949 | -0.91167 |
| C | 0.05971  | -0.57229 | -1.65157 |
| C | 0.17770  | -0.67062 | -3.03643 |
| H | -1.61446 | -3.50378 | -3.55934 |
| H | -1.76550 | -3.36379 | -1.06973 |
| H | 0.53316  | 0.24426  | -1.11973 |
| H | 0.73909  | 0.09080  | -3.58610 |
| N | -0.70429 | -1.62471 | 0.49462  |
| N | -0.32835 | -0.61626 | 1.17282  |
| C | 0.05921  | 0.47118  | 1.76789  |
| C | 0.49226  | 0.46023  | 3.16214  |
| C | 0.06916  | 1.77832  | 1.11691  |
| C | 0.95847  | 1.56817  | 3.79117  |
| H | 0.44102  | -0.49189 | 3.68194  |
| C | 0.49282  | 2.89864  | 1.74881  |
| H | -0.32017 | 1.83214  | 0.10275  |
| C | 1.03125  | 2.86766  | 3.11642  |
| H | 1.29088  | 1.53466  | 4.82417  |
| H | 0.47424  | 3.87354  | 1.26760  |
| O | 1.51154  | 3.87917  | 3.63753  |
| C | -1.13960 | -2.68647 | -3.02104 |
| H | 0.21469  | -1.08445 | -5.42879 |

## 8.20 $F_{OC}$ -0.0100 au OH-AB-O<sup>-</sup> Cis Structure $S_0$ State

$$E_h = -722.8100$$

Cartesian Coordinates:

|   |          |          |          |
|---|----------|----------|----------|
| O | -0.37764 | -1.57772 | -4.42764 |
| C | -0.40308 | -1.65213 | -3.01295 |
| C | -1.56395 | -2.20606 | -0.97467 |
| C | -0.50827 | -1.70293 | -0.18753 |
| C | 0.63148  | -1.21571 | -0.87287 |
| C | 0.68369  | -1.20260 | -2.25774 |
| H | -2.37038 | -2.50958 | -2.95636 |
| H | -2.43072 | -2.61172 | -0.46242 |
| H | 1.46740  | -0.83815 | -0.29587 |
| H | 1.57818  | -0.82526 | -2.75595 |
| N | -0.51761 | -1.91548 | 1.19820  |
| N | -0.11297 | -1.05306 | 2.05480  |
| C | 0.10845  | 0.27593  | 1.85913  |
| C | 0.93530  | 0.93727  | 2.82159  |
| C | -0.45397 | 1.08393  | 0.82111  |
| C | 1.34317  | 2.23215  | 2.65233  |
| H | 1.26583  | 0.35408  | 3.67626  |
| C | -0.09578 | 2.39173  | 0.67106  |
| H | -1.21655 | 0.65855  | 0.17799  |
| C | 0.91362  | 3.02947  | 1.51277  |
| H | 1.99959  | 2.70615  | 3.37547  |
| H | -0.56504 | 3.02147  | -0.08196 |
| O | 1.34089  | 4.17920  | 1.26374  |
| C | -1.52321 | -2.16161 | -2.36997 |
| H | 0.24016  | -0.86931 | -4.64314 |

## 8.21 $F_{OC} + 0.0025$ au OH-AB-O<sup>-</sup> Trans Structure $S_0$ State

$$E_h = -722.8624$$

Cartesian Coordinates:

|   |          |          |          |
|---|----------|----------|----------|
| O | -0.25731 | -0.77723 | -5.80918 |
| C | -0.22022 | -0.66527 | -4.43694 |
| C | -0.56600 | -1.71390 | -2.29738 |
| C | -0.18008 | -0.54429 | -1.62068 |
| C | 0.18755  | 0.57059  | -2.39555 |
| C | 0.16702  | 0.50867  | -3.78480 |
| H | -0.88711 | -2.68691 | -4.20083 |
| H | -0.85040 | -2.57607 | -1.70271 |
| H | 0.48751  | 1.48002  | -1.88984 |
| H | 0.45481  | 1.38160  | -4.36929 |
| N | -0.19732 | -0.59656 | -0.21315 |
| N | 0.16108  | 0.48426  | 0.36417  |
| C | 0.16900  | 0.50898  | 1.73809  |
| C | 0.57110  | 1.72038  | 2.35659  |
| C | -0.19079 | -0.57341 | 2.58982  |
| C | 0.61741  | 1.86141  | 3.72298  |
| H | 0.84532  | 2.54524  | 1.70255  |
| C | -0.14925 | -0.44661 | 3.95424  |
| H | -0.49994 | -1.50478 | 2.12649  |
| C | 0.25848  | 0.78195  | 4.62133  |
| H | 0.92885  | 2.79959  | 4.17600  |
| H | -0.42619 | -1.27957 | 4.59721  |
| O | 0.29362  | 0.88955  | 5.87751  |
| C | -0.58796 | -1.78026 | -3.68519 |
| H | 0.01655  | 0.05450  | -6.21317 |



## 8.22 $F_{OC} + 0.0025$ au OH-AB-O<sup>-</sup> Rotation TS Structure $S_0$ State

$$E_h = -722.8055$$

Cartesian Coordinates:

|   |          |          |          |
|---|----------|----------|----------|
| N | 0.80777  | 1.46746  | -0.08893 |
| N | 0.32181  | 1.37051  | 1.12964  |
| C | -1.21565 | 0.73736  | -1.24553 |
| C | -1.86614 | 0.48702  | -2.45614 |
| C | -1.24305 | 0.73613  | -3.67291 |
| C | 0.06412  | 1.23810  | -3.67475 |
| H | 1.74323  | 1.87059  | -2.50335 |
| H | -1.71697 | 0.52300  | -0.30868 |
| H | -2.87982 | 0.08536  | -2.43870 |
| H | 0.54923  | 1.42820  | -4.62766 |
| C | 0.72927  | 1.48330  | -2.48840 |
| C | 0.11877  | 1.23942  | -1.21977 |
| C | 0.49097  | 0.22359  | 1.79590  |
| C | 0.06416  | 0.20024  | 3.16778  |
| C | 1.06391  | -0.98249 | 1.25505  |
| C | 0.16843  | -0.91912 | 3.93291  |
| H | -0.35943 | 1.12151  | 3.55985  |
| C | 1.16523  | -2.11019 | 2.01099  |
| H | 1.39567  | -0.95933 | 0.22288  |
| C | 0.73752  | -2.15934 | 3.40902  |
| H | -0.17071 | -0.93675 | 4.96545  |
| H | 1.56968  | -3.02973 | 1.59648  |
| O | 0.84299  | -3.18870 | 4.10719  |
| O | -1.84663 | 0.49759  | -4.90429 |
| H | -2.73559 | 0.15549  | -4.75790 |

## 8.23 $F_{OC} + 0.0025$ au OH-AB-O<sup>-</sup> Rotation Inversion TS Structure $S_0$ State

$$E_h = -722.7931$$

Cartesian Coordinates:

|   |          |          |          |
|---|----------|----------|----------|
| N | -0.99112 | 1.40219  | -0.47394 |
| N | -0.55187 | 0.93701  | 0.61623  |
| C | -0.22547 | -0.66639 | -1.71658 |
| C | -0.02049 | -1.30755 | -2.93745 |
| C | -0.26369 | -0.63294 | -4.13470 |
| C | -0.72717 | 0.68327  | -4.10483 |
| H | -1.31803 | 2.32569  | -2.84185 |
| H | -0.04792 | -1.19513 | -0.78768 |
| H | 0.32516  | -2.34071 | -2.95868 |
| H | -0.91524 | 1.19589  | -5.04272 |
| C | -0.94293 | 1.30722  | -2.88302 |
| C | -0.68324 | 0.65446  | -1.66891 |
| C | -0.05597 | 0.47776  | 1.75276  |
| C | 0.86579  | -0.62661 | 1.85803  |
| C | -0.40873 | 1.09539  | 3.00797  |
| C | 1.37342  | -1.05478 | 3.05586  |
| H | 1.17910  | -1.11239 | 0.93789  |
| C | 0.07246  | 0.66433  | 4.21357  |
| H | -1.09640 | 1.93649  | 2.95413  |
| C | 1.00358  | -0.44751 | 4.32496  |
| H | 2.07822  | -1.88229 | 3.09750  |
| H | -0.22257 | 1.15015  | 5.14162  |
| O | 1.45203  | -0.84880 | 5.42868  |
| O | -0.07428 | -1.21576 | -5.36941 |
| H | 0.25233  | -2.11605 | -5.25728 |

## 8.24 $F_{OC} + 0.0025$ au OH-AB-O<sup>-</sup> Inversion TS Structure $S_0$ State

$$E_h = -722.7926$$

Cartesian Coordinates:

|   |          |          |          |
|---|----------|----------|----------|
| O | -0.60930 | -1.81235 | -5.13121 |
| C | -0.54709 | -1.70671 | -3.75852 |
| C | -1.14374 | -2.63375 | -1.61836 |
| C | -0.48850 | -1.59125 | -0.94631 |
| C | 0.15488  | -0.61588 | -1.71723 |
| C | 0.13140  | -0.67408 | -3.11027 |
| H | -1.71034 | -3.49096 | -3.52160 |
| H | -1.62235 | -3.40185 | -1.01737 |
| H | 0.69576  | 0.18034  | -1.21994 |
| H | 0.64864  | 0.08559  | -3.69513 |
| N | -0.46929 | -1.68487 | 0.49289  |
| N | -0.14258 | -0.65768 | 1.15481  |
| C | 0.19290  | 0.47693  | 1.74883  |
| C | 0.39799  | 0.49606  | 3.17587  |
| C | 0.34803  | 1.75594  | 1.09529  |
| C | 0.73267  | 1.62728  | 3.86665  |
| H | 0.27956  | -0.45550 | 3.68925  |
| C | 0.65648  | 2.90190  | 1.77705  |
| H | 0.18271  | 1.80179  | 0.02242  |
| C | 0.88046  | 2.92022  | 3.21546  |
| H | 0.89189  | 1.60228  | 4.94284  |
| H | 0.75126  | 3.85173  | 1.25591  |
| O | 1.17406  | 3.96474  | 3.84609  |
| C | -1.18883 | -2.69132 | -3.00508 |
| H | -0.13834 | -1.07503 | -5.53687 |

## 8.25 $F_{OC} + 0.0025$ au OH-AB-O<sup>-</sup> Cis Structure $S_0$ State

$$E_h = -722.8296$$

Cartesian Coordinates:

|   |          |          |          |
|---|----------|----------|----------|
| O | -0.61721 | -1.81894 | -4.47507 |
| C | -0.51931 | -1.75873 | -3.10096 |
| C | -1.58004 | -2.10217 | -0.96432 |
| C | -0.42801 | -1.67927 | -0.28243 |
| C | 0.68964  | -1.31658 | -1.05231 |
| C | 0.64636  | -1.36145 | -2.44271 |
| H | -2.53642 | -2.44005 | -2.87343 |
| H | -2.43954 | -2.41678 | -0.38048 |
| H | 1.59833  | -0.99542 | -0.55503 |
| H | 1.52781  | -1.08351 | -3.01814 |
| N | -0.36428 | -1.87485 | 1.12409  |
| N | 0.06440  | -1.02419 | 1.97107  |
| C | 0.27007  | 0.33172  | 1.78119  |
| C | 0.92682  | 0.96918  | 2.87269  |
| C | -0.18137 | 1.18434  | 0.72647  |
| C | 1.17659  | 2.31639  | 2.90780  |
| H | 1.23734  | 0.32523  | 3.69256  |
| C | 0.03188  | 2.53858  | 0.76298  |
| H | -0.73003 | 0.76842  | -0.10885 |
| C | 0.73980  | 3.20542  | 1.84757  |
| H | 1.69606  | 2.76948  | 3.74913  |
| H | -0.33873 | 3.17302  | -0.03829 |
| O | 0.93444  | 4.44542  | 1.87065  |
| C | -1.63645 | -2.12663 | -2.35418 |
| H | 0.20041  | -1.50003 | -4.87458 |

## 8.26 $F_{OC} + 0.0050$ au OH-AB-O<sup>-</sup> Trans Structure $S_0$ State

$$E_h = -722.8793$$

Cartesian Coordinates:

|   |          |          |          |
|---|----------|----------|----------|
| O | -0.26541 | -0.80182 | -5.80603 |
| C | -0.22223 | -0.67136 | -4.44395 |
| C | -0.56261 | -1.70303 | -2.29486 |
| C | -0.17465 | -0.52774 | -1.63124 |
| C | 0.19122  | 0.58122  | -2.41321 |
| C | 0.16737  | 0.50925  | -3.80163 |
| H | -0.88849 | -2.69014 | -4.19089 |
| H | -0.84563 | -2.56057 | -1.69299 |
| H | 0.49292  | 1.49552  | -1.91727 |
| H | 0.45334  | 1.37621  | -4.39449 |
| N | -0.18957 | -0.57311 | -0.21929 |
| N | 0.16581  | 0.49901  | 0.36130  |
| C | 0.17138  | 0.51658  | 1.74556  |
| C | 0.57082  | 1.72027  | 2.37090  |
| C | -0.18863 | -0.56727 | 2.58826  |
| C | 0.61405  | 1.85186  | 3.74286  |
| H | 0.84665  | 2.55027  | 1.72414  |
| C | -0.14965 | -0.44836 | 3.95766  |
| H | -0.49685 | -1.49635 | 2.11920  |
| C | 0.25484  | 0.77148  | 4.63388  |
| H | 0.92535  | 2.78968  | 4.19799  |
| H | -0.42872 | -1.28856 | 4.59130  |
| O | 0.28813  | 0.87186  | 5.89899  |
| C | -0.58839 | -1.78098 | -3.68090 |
| H | 0.00469  | 0.01796  | -6.23701 |

## 8.27 $F_{OC} + 0.0050$ au OH-AB-O<sup>-</sup> Rotation TS Structure $S_0$ State

$$E_h = -722.8125$$

Cartesian Coordinates:

|   |          |          |          |
|---|----------|----------|----------|
| N | 0.79690  | 1.46298  | -0.08842 |
| N | 0.30924  | 1.36636  | 1.12659  |
| C | -1.22605 | 0.73934  | -1.25209 |
| C | -1.87062 | 0.48670  | -2.46590 |
| C | -1.24153 | 0.74178  | -3.67923 |
| C | 0.06851  | 1.24180  | -3.67528 |
| H | 1.74305  | 1.86371  | -2.49562 |
| H | -1.72923 | 0.52352  | -0.31668 |
| H | -2.88170 | 0.07998  | -2.45644 |
| H | 0.55466  | 1.43282  | -4.62683 |
| C | 0.72806  | 1.47980  | -2.48674 |
| C | 0.10838  | 1.23534  | -1.22364 |
| C | 0.47754  | 0.21437  | 1.79333  |
| C | 0.06407  | 0.19665  | 3.16641  |
| C | 1.04445  | -0.99320 | 1.25614  |
| C | 0.18776  | -0.91738 | 3.94089  |
| H | -0.36419 | 1.11754  | 3.55543  |
| C | 1.16104  | -2.11708 | 2.02351  |
| H | 1.35837  | -0.98243 | 0.21817  |
| C | 0.76335  | -2.15571 | 3.42646  |
| H | -0.14320 | -0.92805 | 4.97718  |
| H | 1.55713  | -3.03821 | 1.60416  |
| O | 0.89159  | -3.17646 | 4.14394  |
| O | -1.82774 | 0.50949  | -4.90989 |
| H | -2.73107 | 0.19555  | -4.78931 |

**8.28  $F_{OC} + 0.0050$  au OH-AB-O<sup>-</sup> Rotation Inversion TS Structure  $S_0$  State**

$E_h = -722.8069$

Cartesian Coordinates:

|   |          |          |          |
|---|----------|----------|----------|
| N | -0.96376 | 1.40630  | -0.47716 |
| N | -0.53206 | 0.93913  | 0.61227  |
| C | -0.19507 | -0.66620 | -1.72712 |
| C | -0.00388 | -1.30468 | -2.95182 |
| C | -0.27561 | -0.63242 | -4.14606 |
| C | -0.75168 | 0.68011  | -4.10726 |
| H | -1.33573 | 2.31486  | -2.83602 |
| H | 0.00377  | -1.19557 | -0.80281 |
| H | 0.35263  | -2.33339 | -2.98088 |
| H | -0.96186 | 1.18897  | -5.04208 |
| C | -0.95157 | 1.30026  | -2.88232 |
| C | -0.66535 | 0.64892  | -1.67303 |
| C | -0.04178 | 0.47352  | 1.75522  |
| C | 0.86820  | -0.63408 | 1.87402  |
| C | -0.39768 | 1.09891  | 3.00147  |
| C | 1.36326  | -1.05927 | 3.08280  |
| H | 1.18687  | -1.12864 | 0.96063  |
| C | 0.06919  | 0.66857  | 4.21666  |
| H | -1.07600 | 1.94688  | 2.93663  |
| C | 0.98786  | -0.44721 | 4.34417  |
| H | 2.06261  | -1.89143 | 3.12981  |
| H | -0.23147 | 1.16530  | 5.13812  |
| O | 1.42245  | -0.84797 | 5.46151  |
| O | -0.10647 | -1.20421 | -5.38083 |
| H | 0.23011  | -2.10374 | -5.29374 |

## 8.29 $F_{OC} + 0.0050$ au OH-AB-O<sup>-</sup> Inversion TS Structure $S_0$ State

$$E_h = -722.8047$$

Cartesian Coordinates:

|   |          |          |          |
|---|----------|----------|----------|
| O | -0.61909 | -1.86815 | -5.13766 |
| C | -0.55248 | -1.73229 | -3.77508 |
| C | -1.11930 | -2.64110 | -1.61894 |
| C | -0.48745 | -1.57294 | -0.96518 |
| C | 0.12733  | -0.59225 | -1.75154 |
| C | 0.10039  | -0.67114 | -3.14360 |
| H | -1.66709 | -3.54195 | -3.50760 |
| H | -1.57699 | -3.41176 | -1.00517 |
| H | 0.64911  | 0.22664  | -1.27052 |
| H | 0.59403  | 0.09262  | -3.74203 |
| N | -0.47363 | -1.65447 | 0.47729  |
| N | -0.14328 | -0.63508 | 1.14478  |
| C | 0.19919  | 0.49809  | 1.74842  |
| C | 0.37548  | 0.50182  | 3.17621  |
| C | 0.38638  | 1.77831  | 1.11180  |
| C | 0.70823  | 1.62421  | 3.88668  |
| H | 0.23520  | -0.45387 | 3.67690  |
| C | 0.69510  | 2.91580  | 1.81338  |
| H | 0.25033  | 1.83779  | 0.03562  |
| C | 0.88318  | 2.92066  | 3.25482  |
| H | 0.84427  | 1.58555  | 4.96658  |
| H | 0.81550  | 3.86644  | 1.29910  |
| O | 1.17042  | 3.95750  | 3.90958  |
| C | -1.16689 | -2.72162 | -3.00321 |
| H | -0.16963 | -1.13523 | -5.57515 |



### 8.30 $F_{OC} +0.0050$ au OH-AB-O<sup>-</sup> Cis Structure $S_0$ State

$$E_h = -722.8390$$

Cartesian Coordinates:

|   |          |          |          |
|---|----------|----------|----------|
| O | -0.65578 | -1.88416 | -4.48439 |
| C | -0.53735 | -1.79240 | -3.12017 |
| C | -1.57841 | -2.09473 | -0.96683 |
| C | -0.41743 | -1.66635 | -0.30371 |
| C | 0.69226  | -1.31786 | -1.08964 |
| C | 0.63573  | -1.38640 | -2.47960 |
| H | -2.55458 | -2.45965 | -2.86080 |
| H | -2.43243 | -2.40042 | -0.37018 |
| H | 1.60913  | -0.99477 | -0.60853 |
| H | 1.51235  | -1.12358 | -3.06831 |
| N | -0.34316 | -1.85643 | 1.10581  |
| N | 0.09021  | -1.01240 | 1.95472  |
| C | 0.29925  | 0.34890  | 1.77069  |
| C | 0.91826  | 0.97581  | 2.88818  |
| C | -0.12196 | 1.21375  | 0.71366  |
| C | 1.14186  | 2.32721  | 2.95887  |
| H | 1.21705  | 0.32016  | 3.70378  |
| C | 0.06820  | 2.57173  | 0.78304  |
| H | -0.62390 | 0.80595  | -0.15422 |
| C | 0.71393  | 3.23128  | 1.90917  |
| H | 1.63195  | 2.77244  | 3.82266  |
| H | -0.27460 | 3.21160  | -0.02609 |
| O | 0.86975  | 4.47665  | 1.97691  |
| C | -1.64976 | -2.14043 | -2.35415 |
| H | 0.15800  | -1.59730 | -4.91551 |

### 8.31 $F_{OC} + 0.0075$ au OH-AB-O<sup>-</sup> Trans Structure $S_0$ State

$$E_h = -722.8996$$

Cartesian Coordinates:

|   |          |          |          |
|---|----------|----------|----------|
| O | -0.27451 | -0.82902 | -5.80305 |
| C | -0.22468 | -0.67858 | -4.45153 |
| C | -0.55900 | -1.69098 | -2.29180 |
| C | -0.16848 | -0.50911 | -1.64117 |
| C | 0.19559  | 0.59336  | -2.43310 |
| C | 0.16779  | 0.50956  | -3.82020 |
| H | -0.89054 | -2.69418 | -4.17876 |
| H | -0.84056 | -2.54335 | -1.68206 |
| H | 0.49944  | 1.51318  | -1.94868 |
| H | 0.45181  | 1.36973  | -4.42255 |
| N | -0.18086 | -0.54705 | -0.22737 |
| N | 0.17173  | 0.51706  | 0.35887  |
| C | 0.17430  | 0.52541  | 1.75283  |
| C | 0.57068  | 1.72101  | 2.38728  |
| C | -0.18613 | -0.56077 | 2.58628  |
| C | 0.61031  | 1.84156  | 3.76474  |
| H | 0.84803  | 2.55676  | 1.74858  |
| C | -0.15014 | -0.45113 | 3.96074  |
| H | -0.49320 | -1.48700 | 2.11021  |
| C | 0.25106  | 0.75916  | 4.64753  |
| H | 0.92102  | 2.77871  | 4.22330  |
| H | -0.43156 | -1.29913 | 4.58424  |
| O | 0.28133  | 0.85154  | 5.92220  |
| C | -0.58914 | -1.78198 | -3.67560 |
| H | -0.00855 | -0.02286 | -6.26266 |

### 8.32 $F_{OC} + 0.0075$ au OH-AB-O<sup>-</sup> Rotation TS Structure $S_0$ State

$$E_h = -722.8228$$

Cartesian Coordinates:

|   |          |          |          |
|---|----------|----------|----------|
| N | 0.78403  | 1.45137  | -0.09346 |
| N | 0.29563  | 1.35423  | 1.12041  |
| C | -1.24203 | 0.73899  | -1.26468 |
| C | -1.88170 | 0.49436  | -2.48179 |
| C | -1.24469 | 0.75851  | -3.69148 |
| C | 0.07167  | 1.24875  | -3.67978 |
| H | 1.74418  | 1.84598  | -2.48849 |
| H | -1.74824 | 0.52143  | -0.33140 |
| H | -2.89267 | 0.08888  | -2.48309 |
| H | 0.55954  | 1.44224  | -4.62945 |
| C | 0.72637  | 1.47048  | -2.48825 |
| C | 0.09597  | 1.22318  | -1.23055 |
| C | 0.46357  | 0.20008  | 1.79054  |
| C | 0.06108  | 0.19025  | 3.16483  |
| C | 1.03191  | -1.00913 | 1.26407  |
| C | 0.20678  | -0.91559 | 3.95238  |
| H | -0.37594 | 1.11003  | 3.54789  |
| C | 1.16695  | -2.12565 | 2.04792  |
| H | 1.33265  | -1.01443 | 0.22207  |
| C | 0.79439  | -2.15119 | 3.45359  |
| H | -0.11835 | -0.91644 | 4.99182  |
| H | 1.56236  | -3.04727 | 1.62845  |
| O | 0.94681  | -3.16108 | 4.19393  |
| O | -1.81664 | 0.54577  | -4.92116 |
| H | -2.72486 | 0.23549  | -4.82824 |

### 8.33 $F_{OC} + 0.0075$ au OH-AB-O<sup>-</sup> Rotation Inversion TS Structure $S_0$ State

$$E_h = -722.8236$$

Cartesian Coordinates:

|   |          |          |          |
|---|----------|----------|----------|
| N | -0.90553 | 1.42670  | -0.48655 |
| N | -0.49009 | 0.95275  | 0.60467  |
| C | -0.15538 | -0.66082 | -1.73800 |
| C | 0.00759  | -1.30289 | -2.96485 |
| C | -0.30118 | -0.63782 | -4.15644 |
| C | -0.78340 | 0.67345  | -4.11044 |
| H | -1.33899 | 2.30998  | -2.83393 |
| H | 0.07257  | -1.18692 | -0.81845 |
| H | 0.37102  | -2.32841 | -3.00062 |
| H | -1.02097 | 1.17528  | -5.04219 |
| C | -0.95245 | 1.29676  | -2.88413 |
| C | -0.63216 | 0.65160  | -1.67878 |
| C | -0.01788 | 0.47361  | 1.75549  |
| C | 0.88750  | -0.63155 | 1.88999  |
| C | -0.39439 | 1.09517  | 2.99408  |
| C | 1.36255  | -1.05617 | 3.11184  |
| H | 1.22482  | -1.12596 | 0.98334  |
| C | 0.04611  | 0.65841  | 4.22063  |
| H | -1.06823 | 1.94584  | 2.91747  |
| C | 0.96237  | -0.45251 | 4.36596  |
| H | 2.06444  | -1.88621 | 3.16555  |
| H | -0.27545 | 1.15579  | 5.13594  |
| O | 1.37679  | -0.85540 | 5.49876  |
| O | -0.16696 | -1.20574 | -5.38945 |
| H | 0.18428  | -2.10199 | -5.32774 |

### 8.34 $F_{OC} + 0.0075$ au OH-AB-O<sup>-</sup> Inversion TS Structure $S_0$ State

$$E_h = -722.8193$$

Cartesian Coordinates:

|   |          |          |          |
|---|----------|----------|----------|
| O | -0.62187 | -1.93433 | -5.14526 |
| C | -0.55650 | -1.76318 | -3.79379 |
| C | -1.08947 | -2.65072 | -1.62011 |
| C | -0.49467 | -1.54892 | -0.98654 |
| C | 0.08232  | -0.56000 | -1.79137 |
| C | 0.05621  | -0.66497 | -3.18163 |
| H | -1.60249 | -3.60717 | -3.49105 |
| H | -1.52021 | -3.42495 | -0.99162 |
| H | 0.57258  | 0.28895  | -1.32928 |
| H | 0.51793  | 0.10553  | -3.79551 |
| N | -0.49372 | -1.61421 | 0.45736  |
| N | -0.15487 | -0.60499 | 1.13284  |
| C | 0.20063  | 0.52346  | 1.74827  |
| C | 0.34329  | 0.50974  | 3.17687  |
| C | 0.43343  | 1.80322  | 1.13161  |
| C | 0.68255  | 1.61913  | 3.90918  |
| H | 0.17014  | -0.44841 | 3.66301  |
| C | 0.75100  | 2.92811  | 1.85537  |
| H | 0.33045  | 1.87839  | 0.05280  |
| C | 0.90016  | 2.91677  | 3.29923  |
| H | 0.79087  | 1.56491  | 4.99269  |
| H | 0.90695  | 3.87839  | 1.35004  |
| O | 1.19102  | 3.94210  | 3.97947  |
| C | -1.13410 | -2.76006 | -3.00107 |
| H | -0.20332 | -1.20319 | -5.61606 |

### 8.35 $F_{OC} + 0.0075$ au OH-AB-O<sup>-</sup> Cis Structure $S_0$ State

$$E_h = -722.8503$$

Cartesian Coordinates:

|   |          |          |          |
|---|----------|----------|----------|
| O | -0.68367 | -1.96274 | -4.49392 |
| C | -0.55258 | -1.83297 | -3.14044 |
| C | -1.57781 | -2.10363 | -0.97450 |
| C | -0.41791 | -1.64837 | -0.32633 |
| C | 0.68148  | -1.29916 | -1.12549 |
| C | 0.61873  | -1.39792 | -2.51421 |
| H | -2.56041 | -2.51629 | -2.85504 |
| H | -2.42333 | -2.41251 | -0.36729 |
| H | 1.59951  | -0.95841 | -0.65875 |
| H | 1.48886  | -1.13901 | -3.11328 |
| N | -0.33915 | -1.83060 | 1.08600  |
| N | 0.10037  | -0.99627 | 1.93917  |
| C | 0.32230  | 0.36937  | 1.76253  |
| C | 0.90935  | 0.98059  | 2.90371  |
| C | -0.06642 | 1.24977  | 0.70633  |
| C | 1.11724  | 2.33363  | 3.00747  |
| H | 1.19274  | 0.31152  | 3.71463  |
| C | 0.11056  | 2.60931  | 0.80668  |
| H | -0.52825 | 0.85443  | -0.18918 |
| C | 0.70350  | 3.25484  | 1.96855  |
| H | 1.58316  | 2.76716  | 3.89143  |
| H | -0.20310 | 3.25776  | -0.00730 |
| O | 0.83204  | 4.50230  | 2.07682  |
| C | -1.65785 | -2.17583 | -2.35868 |
| H | 0.11922  | -1.68838 | -4.95354 |

### 8.36 $F_{OC} + 0.0100$ au OH-AB-O<sup>-</sup> Trans Structure $S_0$ State

$$E_h = -722.9232$$

Cartesian Coordinates:

|   |          |          |          |
|---|----------|----------|----------|
| O | -0.28351 | -0.85593 | -5.80038 |
| C | -0.22724 | -0.68611 | -4.45946 |
| C | -0.55552 | -1.67918 | -2.28886 |
| C | -0.16232 | -0.49044 | -1.64985 |
| C | 0.20002  | 0.60558  | -2.45343 |
| C | 0.16819  | 0.50966  | -3.83880 |
| H | -0.89279 | -2.69859 | -4.16611 |
| H | -0.83566 | -2.52641 | -1.67138 |
| H | 0.50606  | 1.53099  | -1.98106 |
| H | 0.45027  | 1.36295  | -4.45082 |
| N | -0.17215 | -0.52084 | -0.23670 |
| N | 0.17808  | 0.53656  | 0.35688  |
| C | 0.17729  | 0.53461  | 1.75944  |
| C | 0.57070  | 1.72237  | 2.40419  |
| C | -0.18362 | -0.55436 | 2.58423  |
| C | 0.60653  | 1.83137  | 3.78683  |
| H | 0.84964  | 2.56393  | 1.77387  |
| C | -0.15073 | -0.45425 | 3.96365  |
| H | -0.48937 | -1.47756 | 2.10097  |
| C | 0.24692  | 0.74655  | 4.66101  |
| H | 0.91665  | 2.76763  | 4.24927  |
| H | -0.43436 | -1.31002 | 4.57690  |
| O | 0.27454  | 0.83064  | 5.94572  |
| C | -0.59001 | -1.78322 | -3.66992 |
| H | -0.02185 | -0.06403 | -6.28792 |

### 8.37 $F_{OC} + 0.0100$ au OH-AB-O<sup>-</sup> Rotation TS Structure $S_0$ State

$$E_h = -722.8368$$

Cartesian Coordinates:

|   |          |          |          |
|---|----------|----------|----------|
| N | 0.76963  | 1.42915  | -0.10628 |
| N | 0.28192  | 1.32962  | 1.10862  |
| C | -1.26248 | 0.73117  | -1.28587 |
| C | -1.89870 | 0.50731  | -2.50630 |
| C | -1.25300 | 0.78764  | -3.71196 |
| C | 0.07237  | 1.26097  | -3.69039 |
| H | 1.74537  | 1.81768  | -2.48420 |
| H | -1.77250 | 0.50910  | -0.35582 |
| H | -2.91158 | 0.10848  | -2.52134 |
| H | 0.56192  | 1.46173  | -4.63737 |
| C | 0.72340  | 1.45480  | -2.49505 |
| C | 0.08202  | 1.19924  | -1.24263 |
| C | 0.44956  | 0.17750  | 1.78721  |
| C | 0.05320  | 0.18003  | 3.16199  |
| C | 1.02902  | -1.03383 | 1.28203  |
| C | 0.22418  | -0.91232 | 3.96928  |
| H | -0.39866 | 1.09790  | 3.53352  |
| C | 1.18608  | -2.13689 | 2.08981  |
| H | 1.32292  | -1.06059 | 0.23820  |
| C | 0.83187  | -2.14394 | 3.49611  |
| H | -0.09882 | -0.89838 | 5.01084  |
| H | 1.59037  | -3.05821 | 1.67741  |
| O | 1.01109  | -3.13837 | 4.26533  |
| O | -1.81429 | 0.60912  | -4.94005 |
| H | -2.72614 | 0.30029  | -4.87695 |



**8.38**  $F_{OC} + 0.0100$  au OH-AB-O<sup>-</sup> Rotation Inversion TS Structure  $S_0$  State

$$E_h = -722.8435$$

Cartesian Coordinates:

|   |          |          |          |
|---|----------|----------|----------|
| N | -0.75916 | 1.48743  | -0.51013 |
| N | -0.39027 | 0.99280  | 0.58726  |
| C | -0.12373 | -0.65311 | -1.74439 |
| C | -0.02830 | -1.31604 | -2.96655 |
| C | -0.36436 | -0.65895 | -4.15849 |
| C | -0.80241 | 0.66920  | -4.11455 |
| H | -1.24812 | 2.34161  | -2.84718 |
| H | 0.12784  | -1.17380 | -0.82749 |
| H | 0.30537  | -2.35110 | -3.00264 |
| H | -1.05787 | 1.16395  | -5.04519 |
| C | -0.90084 | 1.31439  | -2.89377 |
| C | -0.55765 | 0.67539  | -1.68932 |
| C | 0.02984  | 0.48343  | 1.74909  |
| C | 0.97335  | -0.58278 | 1.90274  |
| C | -0.43642 | 1.05086  | 2.98035  |
| C | 1.41653  | -1.00724 | 3.14231  |
| H | 1.37870  | -1.03827 | 1.00333  |
| C | -0.04789 | 0.58860  | 4.21953  |
| H | -1.14007 | 1.87595  | 2.89212  |
| C | 0.92264  | -0.46643 | 4.38733  |
| H | 2.16224  | -1.79795 | 3.20575  |
| H | -0.44916 | 1.04164  | 5.12786  |
| O | 1.30689  | -0.87435 | 5.53969  |
| O | -0.30125 | -1.24051 | -5.38269 |
| H | 0.04107  | -2.14178 | -5.34280 |

### 8.39 $F_{OC} + 0.0100$ au OH-AB-O<sup>-</sup> Inversion TS Structure $S_0$ State

$$E_h = -722.8363$$

Cartesian Coordinates:

|   |          |          |          |
|---|----------|----------|----------|
| O | -0.61741 | -2.00719 | -5.15271 |
| C | -0.55645 | -1.79821 | -3.81364 |
| C | -1.04832 | -2.66286 | -1.62096 |
| C | -0.50251 | -1.52228 | -1.00961 |
| C | 0.02676  | -0.52317 | -1.83617 |
| C | 0.00314  | -0.65744 | -3.22354 |
| H | -1.51439 | -3.68216 | -3.47061 |
| H | -1.44598 | -3.44119 | -0.97605 |
| H | 0.47369  | 0.36082  | -1.39575 |
| H | 0.42367  | 0.12165  | -3.85491 |
| N | -0.51923 | -1.56818 | 0.43333  |
| N | -0.17137 | -0.56995 | 1.11906  |
| C | 0.19816  | 0.55183  | 1.74819  |
| C | 0.30250  | 0.52093  | 3.17734  |
| C | 0.48294  | 1.82937  | 1.15413  |
| C | 0.65177  | 1.61487  | 3.93292  |
| H | 0.09011  | -0.43765 | 3.64743  |
| C | 0.81290  | 2.93900  | 1.90177  |
| H | 0.41605  | 1.92021  | 0.07365  |
| C | 0.92101  | 2.91090  | 3.34710  |
| H | 0.72826  | 1.54495  | 5.01958  |
| H | 1.00948  | 3.88745  | 1.40717  |
| O | 1.22084  | 3.92244  | 4.05365  |
| C | -1.08678 | -2.80465 | -2.99752 |
| H | -0.24053 | -1.27592 | -5.65839 |

### 8.40 $F_{OC} +0.0100$ au OH-AB-O<sup>-</sup> Cis Structure $S_0$ State

$$E_h = -722.8635$$

Cartesian Coordinates:

|   |          |          |          |
|---|----------|----------|----------|
| O | -0.69695 | -2.05905 | -4.50390 |
| C | -0.56433 | -1.88313 | -3.16243 |
| C | -1.57855 | -2.13572 | -0.98864 |
| C | -0.43438 | -1.62461 | -0.35131 |
| C | 0.65077  | -1.25446 | -1.16095 |
| C | 0.59169  | -1.39156 | -2.54720 |
| H | -2.54838 | -2.62449 | -2.85704 |
| H | -2.41058 | -2.46398 | -0.37286 |
| H | 1.55987  | -0.87465 | -0.70707 |
| H | 1.45248  | -1.12067 | -3.15362 |
| N | -0.36087 | -1.79375 | 1.06362  |
| N | 0.08663  | -0.97319 | 1.92422  |
| C | 0.33656  | 0.39459  | 1.75634  |
| C | 0.89898  | 0.98342  | 2.91944  |
| C | -0.01457 | 1.29518  | 0.70462  |
| C | 1.10634  | 2.33528  | 3.05499  |
| H | 1.16049  | 0.29823  | 3.72506  |
| C | 0.16361  | 2.65388  | 0.83525  |
| H | -0.44488 | 0.91814  | -0.21440 |
| C | 0.71533  | 3.27770  | 2.02806  |
| H | 1.55463  | 2.75170  | 3.95737  |
| H | -0.11789 | 3.31471  | 0.01951  |
| O | 0.83226  | 4.52465  | 2.17423  |
| C | -1.65868 | -2.24159 | -2.36874 |
| H | 0.08897  | -1.77802 | -4.98918 |
